# Supplementary material for: Role of HDL cholesterol in anthracycline-induced subclinical cardiotoxicity: a prospective observational study in patients with diffuse large B-cell lymphoma treated with R-CHOP
Source: PubMed Central journal article supplement — BMJ Open. 2024 Feb 10;14(2):e074541. doi: 10.1136/bmjopen-2023-074541 (PMC10862278; doi:10.1136/bmjopen-2023-074541), 2024-02-10
Supplement: bmjopen-2023-074541.draft_revisions.pdf [file bmjopen-2023-074541.draft_revisions.pdf]

# BMJ Open

BMJ Open is committed to open peer review. As part of this commitment we make the peer review history of every article we publish publicly available.

When an article is published we post the peer reviewers' comments and the authors' responses online. We also post the versions of the paper that were used during peer review. These are the versions that the peer review comments apply to.

The versions of the paper that follow are the versions that were submitted during the peer review process. They are not the versions of record or the final published versions. They should not be cited or distributed as the published version of this manuscript.

BMJ Open is an open access journal and the full, final, typeset and author-corrected version of record of the manuscript is available on our site with no access controls, subscription charges or pay-per-view fees (<http://bmjopen.bmj.com>).

If you have any questions on BMJ Open's open peer review process please email [info.bmjopen@bmj.com](mailto:info.bmjopen@bmj.com)

# BMJ Open

## HDL-C as a potential protective target against anthracycline-induced subclinical cardiotoxicity in DLBCL patients - an observational prospective study

|                               |                                                                                                                                                                                                                                                                                                                                                                                                                                                                                                                                                                                                                                                                                                                                                                                                                                                                                                                                                                 |
|-------------------------------|-----------------------------------------------------------------------------------------------------------------------------------------------------------------------------------------------------------------------------------------------------------------------------------------------------------------------------------------------------------------------------------------------------------------------------------------------------------------------------------------------------------------------------------------------------------------------------------------------------------------------------------------------------------------------------------------------------------------------------------------------------------------------------------------------------------------------------------------------------------------------------------------------------------------------------------------------------------------|
| Journal:                      | <i>BMJ Open</i>                                                                                                                                                                                                                                                                                                                                                                                                                                                                                                                                                                                                                                                                                                                                                                                                                                                                                                                                                 |
| Manuscript ID                 | bmjopen-2023-074541                                                                                                                                                                                                                                                                                                                                                                                                                                                                                                                                                                                                                                                                                                                                                                                                                                                                                                                                             |
| Article Type:                 | Original research                                                                                                                                                                                                                                                                                                                                                                                                                                                                                                                                                                                                                                                                                                                                                                                                                                                                                                                                               |
| Date Submitted by the Author: | 13-Apr-2023                                                                                                                                                                                                                                                                                                                                                                                                                                                                                                                                                                                                                                                                                                                                                                                                                                                                                                                                                     |
| Complete List of Authors:     | Ou, Wenxin; The First Affiliated Hospital of Chongqing Medical University, Department of Hematology<br>Jiang, Tiantian; The First Affiliated Hospital of Chongqing Medical University, Department of Hematology<br>Zhang, Nan; The First Affiliated Hospital of Chongqing Medical University, Department of Cardiology<br>Lu, Kai; The First Affiliated Hospital of Chongqing Medical University, Department of Cardiology<br>Weng, Yue; The First Affiliated Hospital of Chongqing Medical University, Department of Hematology<br>Zhou, Xi; The First Affiliated Hospital of Chongqing Medical University, Department of Hematology<br>Wang, Dong; The First Affiliated Hospital of Chongqing Medical University, Department of Ultrasound<br>Dong, Qian; The First Affiliated Hospital of Chongqing Medical University, Department of Cardiology<br>Tang, Xiaoqiong; The First Affiliated Hospital of Chongqing Medical University, Department of Hematology |
| Keywords:                     | Lymphoma < HAEMATOLOGY, CHEMOTHERAPY, CARDIOLOGY, Echocardiography < CARDIOLOGY                                                                                                                                                                                                                                                                                                                                                                                                                                                                                                                                                                                                                                                                                                                                                                                                                                                                                 |
|                               |                                                                                                                                                                                                                                                                                                                                                                                                                                                                                                                                                                                                                                                                                                                                                                                                                                                                                                                                                                 |

SCHOLARONE™  
Manuscripts

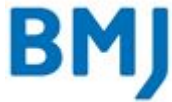

I, the Submitting Author has the right to grant and does grant on behalf of all authors of the Work (as defined in the below author licence), an exclusive licence and/or a non-exclusive licence for contributions from authors who are: i) UK Crown employees; ii) where BMJ has agreed a CC-BY licence shall apply, and/or iii) in accordance with the terms applicable for US Federal Government officers or employees acting as part of their official duties; on a worldwide, perpetual, irrevocable, royalty-free basis to BMJ Publishing Group Ltd ("BMJ") its licensees and where the relevant Journal is co-owned by BMJ to the co-owners of the Journal, to publish the Work in this journal and any other BMJ products and to exploit all rights, as set out in our [licence](#).

The Submitting Author accepts and understands that any supply made under these terms is made by BMJ to the Submitting Author unless you are acting as an employee on behalf of your employer or a postgraduate student of an affiliated institution which is paying any applicable article publishing charge ("APC") for Open Access articles. Where the Submitting Author wishes to make the Work available on an Open Access basis (and intends to pay the relevant APC), the terms of reuse of such Open Access shall be governed by a Creative Commons licence – details of these licences and which [Creative Commons](#) licence will apply to this Work are set out in our licence referred to above.

Other than as permitted in any relevant BMJ Author's Self Archiving Policies, I confirm this Work has not been accepted for publication elsewhere, is not being considered for publication elsewhere and does not duplicate material already published. I confirm all authors consent to publication of this Work and authorise the granting of this licence.

# HDL-C as a potential protective target against anthracycline-induced subclinical cardiotoxicity in DLBCL patients - an observational prospective study

Wenxin Ou<sup>1</sup>, Tiantian Jiang<sup>1</sup>, Nan Zhang<sup>2</sup>, Kai Lu<sup>2</sup>, Yue Weng<sup>1</sup>, Xi Zhou<sup>1</sup>, Dong Wang<sup>3</sup>, Qian Dong<sup>2\*</sup>, Xiaoqiong Tang<sup>1\*</sup>

<sup>1</sup> Department of Hematology, The First Affiliated Hospital of Chongqing Medical University, Chongqing, China

<sup>2</sup> Department of Cardiology, The First Affiliated Hospital of Chongqing Medical University, Chongqing, China

<sup>3</sup> Department of Ultrasound, The First Affiliated Hospital of Chongqing Medical University, Chongqing, China

\*Corresponding Author: Qian Dong and Xiaoqiong Tang contributed equally to this work and are considered as co-corresponding authors.

Qian Dong<sup>2</sup>

1 Youyi Road, Yuzhong District, Chongqing, 400016, People's Republic of China  
Email address: 203748@hospital.cqmu.edu.cn

Xiaoqiong Tang<sup>1</sup>

1 Youyi Road, Yuzhong District, Chongqing, 400016, People's Republic of China  
Email address: [txqcqmu@hospital.cqmu.edu.cn](mailto:txqcqmu@hospital.cqmu.edu.cn)

**Keywords:** cardiotoxicity; DLBCL; anthracycline; HDL-C; GLS

## ABSTRACT

**Objectives** Anthracycline-induced cardiotoxicity is a debilitating cardiac dysfunction for which there are no effective treatments, making early prevention of anthracycline-induced subclinical cardiotoxicity (AISC) crucial. High-density lipoprotein (HDL) is a cardio-protective lipoprotein, but its impact on AISC remains unclear. Our study aims to elucidate the protective capacity of HDL in AISC in patients with diffuse large B-cell lymphoma (DLBCL) treated with R-CHOP.

**Design** Observational prospective study

**Setting** An institution in China from September 2020 to September 2022.

**Participant** 70 chemotherapy-naïve patients newly diagnosed with DLBCL who were scheduled to receive the standard dose of R-CHOP chemotherapy regimen.

**Primary outcome measures** Serum biomarkers including HDL-cholesterol (HDL-C) and apoprotein A1, 2D speckle tracking echocardiography, and conventional echocardiography were

measured at baseline, at the end of the 3rd and 6th cycle of R-CHOP, and 6 and 12 months after the completion of chemotherapy.

**Results** During the follow-up period, 24 patients experienced AISC, while 10 did not. 36 patients were censored. Higher levels of HDL-C were associated with a significantly lower risk of AISC (unadjusted, HR=0.24, P=0.006; adjusted for age and sex, HR=0.28, P=0.018; adjusted for age, sex, hypertension, BMI and E, HR=0.27, P=0.017). Patients without AISC had a more stable and higher HDL-C level during the follow-up period. HDL-C levels were significantly decreased from the end of the 3rd cycle of chemotherapy to the end of the 6th cycle of chemotherapy in all patients (P=0.034), and particularly in the AISC group (P=0.003). The highest level of HDL-C was significantly higher in patients without AISC than in those with AISC (1.52±0.49 vs. 1.22±0.29, P=0.034).

**Conclusions** Our study suggests that higher levels of HDL-C may be associated with a lower risk of AISC in DLBCL patients treated with R-CHOP. HDL-C could be a cardio-protective target, but further research is needed to confirm its benefits and limitations.

**Trial registration number** ChiCTR2100054721

#### **Strengths and limitations of this study**

- This study is the first observational prospective study that investigated the association between HDL-C and AISC, providing an opportunity for investigators to develop a tool for early intervention and prevention of AISC
- The study used advanced imaging techniques (2D-STE) to assess the subclinical cardiac dysfunction in the patients, which can provide more sensitive and accurate results compared to traditional echocardiography.
- The study only included patients with DLBCL who received R-CHOP, which may limit the generalizability of the findings to patients with other types of cancer or chemotherapy regimens.
- Additional studies are necessary to fully evaluate the benefits and limitations of HDL-C as a cardio-protective strategy in anthracycline-treated cancer patients.

#### **INTRODUCTION**

The improved management of cancer has led to a significant increase in the survival rate of cancer survivors(1). However, anthracycline, one of the most effective chemotherapeutic agents used to treat various cancers, is associated with potentially life-threatening and severe cardiovascular diseases(2). Studies have shown a significant increase in mortality in cancer patients with cardiovascular disease(3, 4). As advances in cancer treatment and an aging population continue, the number of patients with both conditions is rising(5). As a result, the field of cardio-oncology has become increasingly important in recent years.

Non-Hodgkin's lymphoma (NHL) is the 7th most common cancer in the United States and the most frequent hematologic malignancy globally, accounting for about 3% of cancer cases and deaths(6). Among NHL, DLBCL is the most prevalent type, representing approximately one-third of all cases(7). The combination of cyclophosphamide, vincristine, doxorubicin, and prednisone

with rituximab (R-CHOP) is a standard first-line therapy that has substantially improved survival outcomes in DLBCL patients(8). Nonetheless, anthracycline-containing chemotherapy agents are associated with cardiotoxicity, a major long-term adverse effect that significantly affects the quality of life and survival of cancer survivors.

Anthracycline-induced cardiotoxicity (AIC) is a devastating consequence of successful cancer treatment, often leading to hypokinetic cardiomyopathy and ultimately heart failure. AIC is an irreversible form of cardiac dysfunction for which no guidelines or accepted therapies for cardioprotection currently exist(9, 10). Therefore, early prevention and detection of AIC are crucial for providing opportunities for early intervention. Anthracycline-induced subclinical cardiotoxicity (AISC) is an early stage of AIC, characterized by abnormal echocardiography index without clinical symptoms(11). Early intervention is recommended by the 2022 International Cardio-Oncology Society (IC-OS) consensus statement once AISC is detected(12). Global longitudinal peak systolic strain (GLS) measured by 2D speckle tracking echocardiography can reliably identify most early myocardial deformation variations. In our study, we used early measurement of GLS to identify AISC(13, 14).

High-density lipoprotein (HDL) is the sole lipoprotein with protective attributes among the five types of lipoproteins. Its salutary effects include antioxidant, anti-inflammatory, and anti-apoptotic properties. Numerous preclinical investigations have suggested that HDL may have direct and indirect protective effects against AIC(15-17). However, clinical data on the relationship between HDL and anthracycline-related cardiotoxicity are currently limited.

We undertook an observational prospective study to investigate the potential impact of HDL on AISC. Using 2D speckle tracking echocardiography, we identified AISC and sought to establish any correlation between HDL and AISC. Additionally, we assessed the fluctuations in HDL-cholesterol (HDL-C) levels during R-CHOP chemotherapy in chemotherapy-naïve patients recently diagnosed with DLBCL.

## **METHODS**

### **Study population**

We recruited chemotherapy-naïve patients newly diagnosed with DLBCL who were scheduled to receive the standard dose of R-CHOP chemotherapy regimen at our institution from September 1<sup>st</sup>, 2020, to September 1<sup>st</sup>, 2022. Our inclusion criteria were as follows: newly diagnosed DLBCL, age between 18 and 80 years; both sex (male and female), Eastern Cooperative Oncology Group (ECOG) performance status  $\leq 2$ , left ventricular ejection fraction (LVEF)  $\geq 50\%$ , and acceptable bone marrow, renal, and hepatic functions for chemotherapy. Conversely, our exclusion criteria were symptomatic heart failure, a history of myocardial ischemia, myocarditis, myocardial infarction, clinical or subclinical pericardial effusion, arrhythmia requiring medical intervention, a history of other cancers, under lipid-lowering treatment, and severe active infections such as syphilis, hepatitis, or human immunodeficiency virus (HIV) infection.

### **Treatment**

1  
2  
3 119 Patients received a total of 6 cycles of standard R-CHOP (cyclophosphamide at 750 mg/m<sup>2</sup> on D1,  
4 120 doxorubicin at 50 mg/m<sup>2</sup> on D1, vincristine at 1.4 [maximum 2] mg/m<sup>2</sup> on D1, and 100 mg  
5 121 prednisone on D1-5, with rituximab at 375 mg/m<sup>2</sup> on D1 in each cycle), with or without 2 cycles  
6 122 of rituximab maintenance (rituximab at 375 mg/m<sup>2</sup> on D1 in each cycle). None of the patients in  
7 123 our study received lipid-lowering treatment during the follow-up period.

### 124 **Definition of subclinical cardiotoxicity**

11 125 According to the IC-OS consensus statement, the definition of subclinical cardiotoxicity was a  
12 126 relative GLS decrease from baseline [(baseline – current GLS)/baseline GLS] of >12%, but with  
13 127 a normal left ventricular ejection fraction (LVEF)(12).

### 15 128 **Study protocol**

16 129 This is an observational prospective study. The study was registered in the Chinese Clinical Trial  
17 130 (Approval NO. ChiCTR2100054721). The study was conducted in accordance with the  
18 131 Declaration of Helsinki and approved by the ethics committee of the First Affiliated Hospital of  
19 132 Chongqing Medical University (Approval NO. 2018-016). And all participating patients provided  
20 133 written informed consent.

23 134 At baseline, the end of the 3rd cycle of R-CHOP, the end of the 6th cycle of R-CHOP, and 6 and  
24 135 12 months after chemotherapy completion, all enrolled patients underwent conventional  
25 136 echocardiography, 2D speckle tracking echocardiography, and blood sampling. Demographic data  
26 137 and clinical variables, including age, gender, body mass index (BMI), ECoG performance status,  
27 138 diabetes mellitus, hypertension, drinking history, and smoking history were collected at the time  
28 139 of enrollment. Left ventricular systolic dysfunction was measured by LVEF, fractional shortening  
29 140 (FS), left ventricular mass index (LVMI), left ventricular diastolic dimension (LVDd), E, e', E/e',  
30 141 and GLS. HDL-C, ApoA1, low-density lipoprotein cholesterol (LDL-C), cardiac troponin T  
31 142 (cTnT), high sensitivity C-reactive protein (hsCRP), N-terminal prohormone of brain natriuretic  
32 143 peptide (NT-proBNP), total cholesterol (TC) and total triglyceride (TG) were measured. We used  
33 144 the baseline HDL-C level as a surrogate marker for HDL quantity. The patients were categorized  
34 145 into two groups based on the average HDL-C value for males and females in the modified criteria  
35 146 of the National Cholesterol Educated Program Adult Treatment Panel (NCEP ATP III)(18). High  
36 147 HDL-C was defined as a serum HDL-C $\geq$ 1.16mmol/L, while low HDL-C was defined as a serum  
37 148 HDL-C<1.16mmol/L.

### 43 149 **Statistical analysis**

44 150 The study was conducted with two aims: firstly, to evaluate the relationship between HDL and  
45 151 AISC; and secondly, to conduct a preliminary exploration of the differences in HDL-C and the  
46 152 variability of HDL-C changes between patients with and without AISC during the follow-up  
47 153 period. Continuous variables were expressed as mean $\pm$  standard deviation (SD) and compared  
48 154 using the t-test. Non-normally distributed variables were presented as median (Q1- Q3) and  
49 155 compared with the Wilcoxon Mann-Whitney test. Categorical variables were expressed as n (%)  
50 156 and compared using the Chi-square or Fisher's exact test, as appropriate. Correlation analysis was  
51 157 conducted to investigate the associations of change in HDL-C with change in GLS. Multiple  
52 158 hypothesis tests were performed using the Bonferroni adjustment. The probabilities of survival

1  
2  
3 159 were calculated using Kaplan-Meier methods and compared using Log-rank tests. Cox  
4 160 proportional-hazards regression models were conducted to assess the association between  
5 161 variables and AISC. Covariates for multivariable Cox regression models included age, sex, and  
6 162 variables that had a P-value of less than 0.15 in the univariable Cox regression analysis (GLS was  
7 163 excluded as it is the factor that defines AISC). Two multivariable Cox regression models were  
8 164 constructed: the first model included age and sex; and the second model included age, sex,  
9 165 hypertension, BMI, and E. Statistical analysis and visualization were performed using IBM SPSS  
10 166 V.22.0 and GraphPad Prism 8. X-Tile software was conducted to calculate the cut-off point of  
11 167 ApoA1(19), with the optimal cut-off value (the lowest P-value under the log-rank test) being  
12 168 1.02g/L. All statistical tests were two-sided, with a P-value less than 0.05 being considered  
13 169 statically significant.

### 170 **Patient and public involvement**

171 Patients or the public were not involved in the design, or conduct, or reporting, or dissemination  
172 plans of our research.

## 173 174 **RESULTS**

### 175 **Assessment of the association between HDL-C and AISC**

#### 176 *Study population and baseline characteristics*

177 This investigation enrolled a total of 70 patients with chemotherapy-naïve DLBCL and were  
178 planned to be treated with the standard R-CHOP regimen. Based on the baseline HDL-C level, we  
179 segregated the patients into two groups: the high-level group (HDL-C  $\geq$  1.16mmol/L, n=28) and  
180 the low-level group (HDL-C < 1.16mmol/L, n=42). Patients with drinking history had a greater  
181 chance of having a high HDL-C level (P=0.034). The patients with high HDL-C showed  
182 substantially higher total cholesterol (P=0.011), lower total triglyceride (P=0.002), and higher  
183 ApoA1 (P<0.001). The baseline characteristics of the patients in both groups were well balanced  
184 (Table S1).

#### 185 186 *High HDL-C was an independent protective target of anthracycline-induced subclinical 187 cardiotoxicity*

188 The clinical endpoint was defined as the first detection of AISC, and the median survival time of  
189 the whole cohort was 16 months. The median survival time of patients with low HDL-C was 4  
190 months, while that of patients with high HDL-C was not reached. The median follow-up time of  
191 the cohort was 10 months. During the follow-up period, 24 patients experienced AISC, while 10  
192 did not. Approximately half of the patients (n=36) were censored. A flowchart detailing the  
193 patients enrolled in the study and the reasons for censored patients can be found in Figure S1.

194 The log-rank test revealed that patients with higher HDL-C were less likely to experience AISC  
195 (P=0.001, HR=0.26, 95%CI: 0.12-0.58) (Figure S2a). However, there were no significant  
196 differences in AISC occurrence between different ApoA1 levels (P=0.123, HR=0.54, 95%CI:  
197 0.20-1.45) (Figure S2b).



198 According to the results of the univariable Cox regression analysis, variables that had a P-value of  
 199 less than 0.15 including age, BMI, hypertension, GLS, E, and HDL-C group. Increasing age was  
 200 significantly associated with a decreased HR of 0.97 (95%CI 0.943-0.998, P=0.034) per 1-year  
 201 increase. BMI showed a HR of 1.09 (95% CI 0.97-1.22, P=0.139) per 1 kg/m<sup>2</sup> increase. Similarly,  
 202 hypertension had a HR of 0.22 (95% CI 0.03-1.62, P=0.136) for yes versus no. A lower GLS was  
 203 significantly associated with an increased HR of 1.46 (95% CI 1.20-1.77, P<0.001) per -1%  
 204 decrease. E velocity showed a HR of 1.03 (95% CI 1.00-1.06, P=0.075) per 1 cm/s increase. The  
 205 HDL-C group (high versus low) had a significantly lower HR of 0.24 (95% CI 0.09-0.67,  
 206 P=0.006). Further details about other variables can be found in Table S2.

207 The results of the multivariable Cox regression analysis showed that high HDL-C was significantly  
 208 associated with a lower risk of AISC after adjusting for age and sex (model 1) (HR=0.28,  
 209 95%CI:0.10=0.84, P=0.018). Similarly, after adjusting for age, sex, and variables that P<0.15 in  
 210 the univariable Cox regression analysis (excluding GLS as it defines AISC) (model 2), the same  
 211 association was observed (HR=0.27, 95%CI: 0.09-0.79, P=0.017). In contrast, ApoA1 did not  
 212 show any influence on AISC in either of the two regression models (P=0.401 and P=0.237). (Table  
 213 1)

214 Table 1. Outcomes of study participants.

|            | HR (95%CI)<br>(unadjusted) | P values     | HR (95%CI)<br>(adjusted*) | P values     | HR (95%CI)<br>(adjusted#) | P values     |
|------------|----------------------------|--------------|---------------------------|--------------|---------------------------|--------------|
| Low HDL-C  | Ref                        |              | Ref                       |              | Ref                       |              |
| High HDL-C | 0.24 (0.09-0.67)           | <b>0.006</b> | 0.28 (0.10-0.80)          | <b>0.018</b> | 0.27 (0.09- 0.79)         | <b>0.017</b> |
| Low ApoA1  | Ref                        |              | Ref                       |              | Ref                       |              |
| High ApoA1 | 0.54 (0.22-1.29)           | 0.165        | 0.66 (0.26-1.73)          | 0.401        | 0.54 (0.19-1.50)          | 0.237        |

215 The endpoint was defined as the first detection of anthracycline-induced subclinical  
 216 cardiotoxicity.

217 Low HDL-C: HDL-C<1.16mmol/L; High HDL-C: HDL-C≥1.16mmol/L. Low ApoA1:  
 218 ApoA1<1.02g/L; High ApoA1: ApoA1≥1.02g/L. \*Adjusted for age and sex. #Adjusted for age,  
 219 sex, hypertension, body mass index, E. HR, hazard ratio; HDL-C, high-density lipoprotein-  
 220 cholesterol, ApoA1, apolipoprotein A1.

## 222 Preliminary exploration of the difference of HDL-C between patients with AISC and 223 without AISC

### 224 *Study population and baseline characteristics*

225 In this analysis, we selectively included 34 of the enrolled patients who remained uncensored. The  
 226 patients who exhibited AISC at any time during the follow-up period were segregated into the  
 227 AISC group (n=24), while those who did not demonstrate AISC were classified into the NO-AISC  
 228 group (n=10). Patients within the AISC group were comparatively younger (50±12.45 vs.  
 229 59.7±9.67, P=0.035) and exhibited a higher baseline GLS [22.0 (21.0, 22.8) vs. 18.0 (17.0, 20.0),  
 230 P<0.001]. More baseline information can be seen in Table S3.

### 231 *Timeline of HDL-C level in patients with and without AISC*

232 Figure 1 displays the timeline of HDL-C levels in patients with and without AISC. In Figure 1a,  
 233 the patient population was categorized into four groups based on the time of AISC detection.

234 Among the groups, 12 patients were identified with AISC at the end of the 3rd cycle of  
235 chemotherapy, 7 patients at the end of the 6th cycle, 3 patients at 6 months after treatment  
236 completion, and 2 patients at 12 months after treatment completion. With the exception of the  
237 group in which patients detected AISC at the end of the 3rd cycle of chemotherapy, all other groups  
238 exhibited a reduction in HDL-C values from the end of the 3rd cycle of chemotherapy to the end  
239 of the 6th cycle of chemotherapy. Figure 1b portrays the HDL-C level in patients without AISC,  
240 indicating that the HDL-C level was more stable than in patients with AISC. Moreover, the overall  
241 HDL-C level was higher in patients without AISC than in patients with AISC throughout the  
242 follow-up period (Figure 2a). In Figure 2b, there was a significant decrease in GLS during the  
243 chemotherapy period (from 0-4 months), which remained stable after completion of chemotherapy  
244 (after 4 months) in patients with AISC.

245 Based on Figure 2, we observed that the fluctuations in HDL-C and GLS were most pronounced  
246 during the chemotherapy period. The fluctuations in HDL-C levels of patients with DLBCL during  
247 R-CHOP chemotherapy were presented in Figure 3. The levels of HDL-C significantly increased  
248 for all patients from baseline to the end of the 3rd cycle of chemotherapy ( $P=0.012$ ) and  
249 significantly decreased from the end of the 3rd cycle to the end of the 6th cycle of chemotherapy  
250 ( $P=0.034$ ) (Figure 3a). Patients with AISC showed a significant decrease in HDL-C levels during  
251 R-CHOP chemotherapy from the end of the 3rd cycle to the end of the 6th cycle ( $P=0.003$ ) (Figure  
252 3b). However, no significant difference was observed in HDL-C levels for patients without AISC  
253 during R-CHOP chemotherapy (Figure 3c). We conducted correlation analysis separately for the  
254 change in HDL-C and GLS from baseline to after 3 cycles of chemotherapy, from baseline to after  
255 6 cycles of chemotherapy, and from after 3 cycles to after 6 cycles of chemotherapy. However, we  
256 found no statistically significant differences in the associations between changes in HDL-C and  
257 GLS ( $P=0.965, 0.087, 0.449$ ).

#### 258 *Contrasting values of HDL-C parameters between patients with and without AISC*

259 Figure 4 presents the contrasting values between patients with AISC and those without in terms of  
260 four parameters, namely the highest and lowest levels of HDL-C during chemotherapy, the  
261 increment and decline in HDL-C values from baseline. Patients without AISC showed significantly  
262 higher values in the highest level of HDL-C ( $1.52\pm 0.49$  vs.  $1.22\pm 0.29$ ,  $P=0.034$ , Figure 4a).  
263 However, no significant differences were observed between the two groups in terms of HDL-C  
264 increment from baseline to the highest value ( $0.31\pm 0.31$  vs.  $0.22\pm 0.23$ ,  $P=0.386$ , Figure 4b). While  
265 the lowest level of HDL-C was lower in patients with AISC, the difference was not statistically  
266 significant ( $0.84\pm 0.16$  vs.  $1.03\pm 0.41$ ,  $P=0.182$ , Figure 4c). Furthermore, there were no significant  
267 differences in HDL-C decline between patients with AISC and those without ( $0.16\pm 0.20$  vs.  
268  $0.18\pm 0.26$ ,  $P=0.777$ , Figure 4d).

269

## 270 **DISCUSSION**

271 This prospective observational study investigated the relationship between HDL-C and incidence  
272 of AISC in 70 patients with DLBCL who were receiving anthracycline-containing chemotherapy.  
273 The study found that higher levels of HDL-C were associated with a lower incidence of AISC.

1  
2  
3 274 Moreover, patients without AISC had more stable and higher levels of HDL-C than those with  
4 275 AISC during the follow-up period. The results also showed that HDL-C levels were significantly  
5 276 decreased from the end of the 3rd cycle of chemotherapy to the end of the 6th cycle of  
6 277 chemotherapy in all patients, especially in the AISC group, indicating that anthracycline-  
7 278 containing chemotherapy has adverse effects on HDL-C levels. Notably, the highest level of HDL-  
8 279 C was significantly higher in patients without AISC compared to those with AISC. These findings  
9 280 suggest that HDL-C may have a protective role against AISC in DLBCL patients undergoing  
10 281 anthracycline-containing chemotherapy and maintaining a relatively high level of HDL-C may be  
11 282 more effective in managing cardio-protection than monitoring changes in HDL-C levels over time.  
12 283 The results of this study highlight the importance of early serum lipid management in these  
13 284 patients.

14 285 Lipoproteins are classified into five categories, namely chylomicron, very-low-density lipoprotein  
15 286 (VLDL), intermediate-density lipoprotein (IDL), low-density lipoprotein (LDL), and high-density  
16 287 lipoprotein (HDL), based on their size, density, and lipid composition (cholesterol and  
17 288 triglycerides)(20). Among these, HDL exhibits distinctive cytoprotective actions and triggers anti-  
18 289 oxidative, anti-inflammatory, and anti-apoptotic effects. The protective roles of HDL in  
19 290 cardiovascular disease have been controversial in recent years, and that the quality of HDL  
20 291 (cholesterol efflux capacity, antioxidant activity, anti-inflammatory activity, endothelial function,  
21 292 etc.) rather than the quantity of HDL has been proposed as the true cardioprotective effect. The  
22 293 Framingham Heart Study, as early as 1988, reported a correlation between HDL-C and  
23 294 cardiovascular mortality(21). Recent studies have challenged the HDL-C hypothesis by revealing  
24 295 that HDL-C level is not inversely correlated with cardiovascular diseases(22, 23). In our study, we  
25 296 used the baseline HDL-C level as a surrogate marker for HDL quantity, but we did not directly  
26 297 measure the quality of HDL. Measuring the level of HDL-C in serum is a commonly used method  
27 298 to assess the effect of HDL on cardiovascular health. HDL facilitates the transportation of  
28 299 cholesterol from the body's tissues back to the liver, and higher levels of HDL-C are generally  
29 300 associated with a lower risk of heart disease. Nevertheless, it's crucial to note that HDL-C levels  
30 301 may not accurately reflect the functional properties of HDL. ApoA1, the most abundant protein in  
31 302 HDL, is associated with several beneficial effects of HDL(15, 24). The function and abundance of  
32 303 ApoA1 are reported to play a dominant role in HDL quality(25). In the context of AIC, several  
33 304 studies have indicated that HDL can protect against anthracycline-induced cardiomyocyte  
34 305 apoptosis and atrophy in isolated cardiomyocytes(26, 27) and animal models(16, 27). Based on  
35 306 these earlier trials, HDL-C and ApoA1 could serve as protective factors against anthracycline-  
36 307 related cardiovascular disease. However, our study results indicate that there was no significant  
37 308 association observed between ApoA1 and AISC in patients with DLBCL who were treated with  
38 309 R-CHOP. It's possible that factors other than HDL function, such as genetics or inflammation, may  
39 310 affect ApoA1 levels. Furthermore, we must acknowledge that our study was observational in  
40 311 nature and, therefore, cannot establish causality. Additionally, other unmeasured factors may have  
41 312 contributed to the observed relationship between HDL-C levels and AISC risk.

1  
2  
3 313 As far as we know, few clinical studies have investigated the association between HDL-C and  
4 314 AISC. This study is the first clinical trial that utilizes the IC-OS consensus statement(12) to define  
5 315 subclinical cardiotoxicity, with univariate and multivariable analyses being used to identify the  
6 316 influential factors of AISC in DLBCL patients in this cohort. Kaplan-Meier methods and Log-rank  
7 317 tests reveal that patients with high HDL-C levels were less likely to develop AISC. After subjecting  
8 318 it to univariate and multivariable Cox regression methods, high HDL-C levels still showed  
9 319 statistically significant differences. These results suggest that high HDL-C could be a potentially  
10 320 independent protective factor for AISC in DLBCL patients and provide an opportunity for  
11 321 investigators to develop a tool for early intervention and prevention of AISC. Further research is  
12 322 necessary to confirm our findings.

13 323 Several studies have demonstrated that serum lipid levels are altered during anthracycline-  
14 324 containing chemotherapy in cancer patients(28, 29). Huxley et al and Averina et al have shown  
15 325 that imbalanced serum lipid distribution is a risk factor for cardiovascular disease(30, 31). As a  
16 326 result, anthracycline-containing treatment can induce dyslipidemia and facilitate the occurrence  
17 327 and development of cardiovascular diseases in cancer patients. In a study of 394 breast cancer  
18 328 patients, Xin et al found that HDL-C levels after chemotherapy were significantly lower than those  
19 329 before chemotherapy(32). Similarly, Lu et al and Hana et al found that HDL-C levels were  
20 330 significantly decreased during anthracycline-containing chemotherapy in patients with breast  
21 331 cancer(33, 34). In our study, we specifically assessed the changes in HDL-C levels over time  
22 332 during follow-up. Except for the group of patients who experienced AISC at 12 months after  
23 333 treatment completion, HDL-C levels in all other groups increased from baseline to the 3rd cycle  
24 334 of chemotherapy. This phenomenon may be due to the fact that anti-tumor drugs require  
25 335 cholesterol to cross cell membranes(35). However, HDL-C levels were significantly decreased  
26 336 from the end of the 3rd cycle of chemotherapy to the end of the 6th cycle of chemotherapy in all  
27 337 patients, especially in the AISC group, which is consistent with previous research results(32-34),  
28 338 and further confirmed that anthracycline-contained chemotherapy has adverse effects on HDL-C  
29 339 levels in DLBCL patients. The HDL-C level in patients without AISC was more stable than that  
30 340 in patients with AISC. Therefore, anthracycline-containing chemotherapy may promote the  
31 341 occurrence and development of cardiotoxicity in DLBCL patients by inducing HDL-C turbulence.  
32 342 Besides, the findings of our study indicate a significant decrease in GLS during the chemotherapy  
33 343 period in patients with AISC. This result is consistent with previous research, which has reported  
34 344 that doxorubicin dose at the range of 100-150mg/m<sup>2</sup> can cause cardiotoxicity(36). Notably, we  
35 345 also observed that GLS remained stable after completion of chemotherapy, suggesting that the  
36 346 cardiac effects of anthracycline-based chemotherapy may be dose-related. These findings have  
37 347 important implications for the monitoring and management of cardiotoxicity in patients  
38 348 undergoing anthracycline-based chemotherapy, as early detection of cardiac dysfunction during  
39 349 treatment may improve patient outcomes. We investigated the associations of change in HDL-C  
40 350 with change in GLS, no statistically significant differences were found.

41 351 The analysis of HDL-C levels should not only consider the changes over time, but also the absolute  
42 352 values. In our study, patients without AISC had significantly higher absolute highest HDL-C levels

1  
2  
3 353 than those with AISC, while the absolute lowest HDL-C levels did not differ significantly between  
4 354 the two groups. The alterations from HDL-C extremes to baseline did not exhibit any variation  
5 355 between the groups either. This suggests that the highest absolute HDL-C value was a preferable  
6 356 indicator of AISC protection than the change in HDL-C from baseline to the extremum value.  
7 357 Maintaining a relatively high level of HDL-C may be more effective in managing the cardio-  
8 358 protection of anthracycline-treated cancer patients than monitoring changes in HDL-C levels over  
9 359 time.

10 360 In our investigation, we observed that among the four patients with pre-existing hypertension, only  
11 361 one patient experienced AISC during the follow-up (Table S3). Although there was no statistically  
12 362 significant difference, it appears that patients with pre-existing hypertension were less likely to  
13 363 experience AISC. Hypertension, a common risk factor for both cancer and cardiovascular diseases,  
14 364 was also recognized as a risk factor for cardiotoxicity. Studies have reported that pre-existing  
15 365 hypertension was associated with anthracycline-and trastuzumab induced left ventricular ejection  
16 366 fraction (LVEF) decline in a retrospective study(37), and early left ventricular systolic dysfunction  
17 367 in patients with lymphoma receiving (R)-CHOP in a prospective study(38). However, in our study,  
18 368 multivariable Cox regression analysis showed that hypertension had no influence on AISC  
19 369 ( $P>0.05$ ). However, in our investigation, multivariable Cox regression analysis showed that  
20 370 hypertension did not have a significant impact on AISC ( $P>0.05$ ). We noted that all patients with  
21 371 hypertension were under a single antihypertensive drug regimen (beta-blockers or ACEI/ARB) to  
22 372 manage their blood pressure. Two meta-analyses have demonstrated that beta-blockers and ACEI  
23 373 can prevent cardiotoxicity caused by chemotherapy (39, 40). We speculate that the protective  
24 374 effects of beta-blockers and ACEI/ARB may have contributed to the result observed in our study  
25 375 regarding the relationship between hypertension and AISC.

26 376 There are several limitations to our study that must be acknowledged. Firstly, while our study  
27 377 highlights the potential importance of HDL-C in managing AISC, additional studies are necessary  
28 378 to fully evaluate the benefits and limitations of HDL-C as a cardio-protective strategy in  
29 379 anthracycline-treated cancer patients. Secondly, this is a single-center observational prospective  
30 380 study with a medium sample size. To confirm our findings, a larger sample size study conducted  
31 381 at multiple centers is needed. Thirdly, previous studies have suggested that there may be a reversed  
32 382 U-shaped relationship between HDL-C levels and cardiovascular diseases(41). Due to the small  
33 383 sample size of this study, we didn't further investigate the influence of extremely high levels of  
34 384 HDL-C on cardiotoxicity, and further clinical studies should be done to verify it. However, due to  
35 385 the small sample size of our study, we did not investigate the potential impact of extremely high  
36 386 HDL-C levels on cardiotoxicity. Further clinical studies are required to explore this issue. Besides,  
37 387 the measurement of GLS was only taken at baseline and at several points throughout the  
38 388 chemotherapy treatment and follow-up period. It is crucial to extend the duration of follow-up in  
39 389 future research to obtain a more comprehensive understanding of the long-term effects of  
40 390 anthracycline treatment on cardiovascular health.

41 391

## 42 392 **CONCLUSIONS**

393 In conclusion, our observational prospective study suggests that higher levels of HDL-C may be  
394 associated with a lower risk of AISC in patients with DLBCL treated with R-CHOP chemotherapy.  
395 HDL-C levels remained stable and consistently higher in patients without AISC compared to those  
396 with AISC. Additionally, the highest absolute HDL-C value was found to be a preferable indicator  
397 of AISC protection. These findings suggest that HDL-C may be a potential cardio-protective target  
398 for managing AISC in this patient population. However, further research is needed to confirm and  
399 expand on these findings, including determining the optimal HDL-C level for cardio-protection  
400 and the potential benefits of early serum lipid management.

401

#### 402 **ACKNOWLEDGMENTS**

403 The authors would like to thank all the nurses, other medical workers and patients' families who  
404 assisted in this study.

405

#### 406 **COMPETING INTERESTS**

407 The authors declare no conflict of interest.

408

#### 409 **FUNDING**

410 This research was funded by the Science-Health Joint Medical Scientific Research Project of  
411 Chongqing “Study of antineoplastic drugs induced early cardiotoxicity in patients with Lymphoma  
412 ” (Grant No. 2021MSXM276), the Natural Science Foundation of Chongqing “The mechanism of  
413 doxorubicin promoting atherosclerosis in lymphoma patients through NF- $\kappa$ B/miR-33 signaling  
414 pathway” (Grant No. cstc2019jcyj-msxmX0043), the Science-Health Joint Medical Scientific  
415 Research Project of Chongqing “Evaluation of cardiac function in patients with anthracycline  
416 chemotherapy by a new strain imaging technique” (Gant No. 2019ZDXM033), and the Chongqing  
417 Postgraduate Scientific Research and Innovation Project “Study on the role of high-density  
418 lipoprotein in anthracycline-induced subclinical cardiotoxicity in patients with lymphoma” (Grant  
419 No. CYS22340).

420

#### 421 **AUTHOR CONTRIBUTIONS**

422 Conceptualization, Wenxin Ou, Tiantian Jiang, Nan Zhang, Kai Lu, Yue Weng, Xi Zhou, Dong  
423 Wang, Qian Dong and Xiaoqiong Tang; Data curation, Wenxin Ou, Tiantian Jiang, Yue Weng and  
424 Xi Zhou; Formal analysis, Wenxin Ou and Tiantian Jiang; Funding acquisi-tion, Wenxin Ou, Nan  
425 Zhang, Dong Wang and Xiaoqiong Tang; Investigation, Dong Wang, Qian Dong and Xiaoqiong  
426 Tang; Methodology, Wenxin Ou, Tiantian Jiang, Nan Zhang, Kai Lu, Yue Weng, Xi Zhou, Dong  
427 Wang, Qian Dong and Xiaoqiong Tang; Resources, Dong Wang, Qian Dong and Xiaoqiong Tang;  
428 Supervision, Qian Dong and Xiaoqiong Tang; Validation, Nan Zhang and Kai Lu; Visualization,  
429 Wenxin Ou and Tiantian Jiang; Writing – original draft, Wenxin Ou; Writing – review & editing,  
430 Wenxin Ou, Tiantian Jiang, Nan Zhang, Kai Lu, Yue Weng, Xi Zhou, Dong Wang, Qian Dong  
431 and Xiaoqiong Tang. Qian Dong and Xiaoqiong Tang contributed equally to this work and are  
432 considered as co-corresponding authors.

433

434

435

436

437

438

439

433

**DATA AVAILABILITY STATEMENT**

Data are available upon reasonable request.

436

**REFERENCE**

1. Rosen MR, Myerburg RJ, Francis DP, Cole GD, Marbán E. Translating stem cell research to cardiac disease therapies: pitfalls and prospects for improvement. *J Am Coll Cardiol*. 2014;64(9):922-37.
2. Minotti G, Menna P, Salvatorelli E, Cairo G, Gianni L. Anthracyclines: molecular advances and pharmacologic developments in antitumor activity and cardiotoxicity. *Pharmacol Rev*. 2004;56(2):185-229.
3. Hasin T, Gerber Y, McNallan SM, Weston SA, Kushwaha SS, Nelson TJ, et al. Patients with heart failure have an increased risk of incident cancer. *J Am Coll Cardiol*. 2013;62(10):881-6.
4. Abdel-Qadir H, Austin PC, Lee DS, Amir E, Tu JV, Thavendiranathan P, et al. A Population-Based Study of Cardiovascular Mortality Following Early-Stage Breast Cancer. *JAMA Cardiol*. 2017;2(1):88-93.
5. Stoltzfus KC, Zhang Y, Sturgeon K, Sinoway LI, Trifiletti DM, Chinchilli VM, et al. Fatal heart disease among cancer patients. *Nat Commun*. 2020;11(1):2011.
6. Thandra KC, Barsouk A, Saginala K, Padala SA, Barsouk A, Rawla P. Epidemiology of Non-Hodgkin's Lymphoma. *Med Sci (Basel)*. 2021;9(1).
7. Teras LR, DeSantis CE, Cerhan JR, Morton LM, Jemal A, Flowers CR. 2016 US lymphoid malignancy statistics by World Health Organization subtypes. *CA Cancer J Clin*. 2016;66(6):443-59.
8. Salles G, Barrett M, Foà R, Maurer J, O'Brien S, Valente N, et al. Rituximab in B-Cell Hematologic Malignancies: A Review of 20 Years of Clinical Experience. *Adv Ther*. 2017;34(10):2232-73.
9. McGowan JV, Chung R, Maulik A, Piotrowska I, Walker JM, Yellon DM. Anthracycline Chemotherapy and Cardiotoxicity. *Cardiovasc Drugs Ther*. 2017;31(1):63-75.
10. Russell RR, Alexander J, Jain D, Poornima IG, Srivastava AV, Storozynsky E, et al. The role and clinical effectiveness of multimodality imaging in the management of cardiac complications of cancer and cancer therapy. *J Nucl Cardiol*. 2016;23(4):856-84.
11. Curigliano G, Lenihan D, Fradley M, Ganatra S, Barac A, Blaes A, et al. Management of cardiac disease in cancer patients throughout oncological treatment: ESMO consensus recommendations. *Ann Oncol*. 2020;31(2):171-90.
12. Herrmann J, Lenihan D, Armenian S, Barac A, Blaes A, Cardinale D, et al. Defining cardiovascular toxicities of cancer therapies: an International Cardio-Oncology Society (IC-OS) consensus statement. *Eur Heart J*. 2022;43(4):280-99.
13. Fallah-Rad N, Walker JR, Wassef A, Lytwyn M, Bohonis S, Fang T, et al. The utility of cardiac biomarkers, tissue velocity and strain imaging, and cardiac magnetic resonance imaging in predicting early left ventricular dysfunction in patients with human epidermal growth factor receptor II-positive breast cancer treated with adjuvant trastuzumab therapy. *J Am Coll Cardiol*. 2011;57(22):2263-70.
14. Negishi K, Negishi T, Haluska BA, Hare JL, Plana JC, Marwick TH. Use of speckle strain to assess left ventricular responses to cardiotoxic chemotherapy and cardioprotection. *Eur Heart J Cardiovasc Imaging*. 2014;15(3):324-31.
15. Kluck GEG, Durham KK, Yoo JA, Trigatti BL. High Density Lipoprotein and Its Precursor Protein Apolipoprotein A1 as Potential Therapeutics to Prevent Anthracycline Associated Cardiotoxicity. *Front Cardiovasc Med*. 2020;7:65.

- 1  
2  
3 482 16. Durham KK, Chathely KM, Mak KC, Momen A, Thomas CT, Zhao YY, et al. HDL  
4 483 protects against doxorubicin-induced cardiotoxicity in a scavenger receptor class B type 1-,  
5 484 PI3K-, and Akt-dependent manner. *Am J Physiol Heart Circ Physiol*. 2018;314(1):H31-h44.
- 6 485 17. Van Linthout S, Frias M, Singh N, De Geest B. Therapeutic potential of HDL in  
7 486 cardioprotection and tissue repair. *Handb Exp Pharmacol*. 2015;224:527-65.
- 8 487 18. Executive Summary of The Third Report of The National Cholesterol Education Program  
9 488 (NCEP) Expert Panel on Detection, Evaluation, And Treatment of High Blood Cholesterol In  
10 489 Adults (Adult Treatment Panel III). *Jama*. 2001;285(19):2486-97.
- 11 490 19. Camp RL, Dolled-Filhart M, Rimm DL. X-tile: a new bio-informatics tool for biomarker  
12 491 assessment and outcome-based cut-point optimization. *Clin Cancer Res*. 2004;10(21):7252-9.
- 13 492 20. Mahley RW, Innerarity TL, Rall SC, Jr., Weisgraber KH. Plasma lipoproteins:  
14 493 apolipoprotein structure and function. *J Lipid Res*. 1984;25(12):1277-94.
- 15 494 21. Wilson PW, Abbott RD, Castelli WP. High density lipoprotein cholesterol and mortality.  
16 495 The Framingham Heart Study. *Arteriosclerosis*. 1988;8(6):737-41.
- 17 496 22. Schwartz GG, Olsson AG, Abt M, Ballantyne CM, Barter PJ, Brumm J, et al. Effects of  
18 497 dalcetrapib in patients with a recent acute coronary syndrome. *N Engl J Med*.  
19 498 2012;367(22):2089-99.
- 20 499 23. Lincoff AM, Nicholls SJ, Riesmeyer JS, Barter PJ, Brewer HB, Fox KAA, et al.  
21 500 Evacetrapib and Cardiovascular Outcomes in High-Risk Vascular Disease. *N Engl J Med*.  
22 501 2017;376(20):1933-42.
- 23 502 24. Rader DJ. Molecular regulation of HDL metabolism and function: implications for novel  
24 503 therapies. *J Clin Invest*. 2006;116(12):3090-100.
- 25 504 25. Smith JD. Dysfunctional HDL as a diagnostic and therapeutic target. *Arterioscler Thromb*  
26 505 *Vasc Biol*. 2010;30(2):151-5.
- 27 506 26. Brinck JW, Thomas A, Brulhart-Meynet MC, Lauer E, Frej C, Dahlbäck B, et al. High-  
28 507 density lipoprotein from end-stage renal disease patients exhibits superior cardioprotection and  
29 508 increase in sphingosine-1-phosphate. *Eur J Clin Invest*. 2018;48(2).
- 30 509 27. Durham KK, Kluck G, Mak KC, Deng YD, Trigatti BL. Treatment with apolipoprotein A1  
31 510 protects mice against doxorubicin-induced cardiotoxicity in a scavenger receptor class B, type I-  
32 511 dependent manner. *Am J Physiol Heart Circ Physiol*. 2019;316(6):H1447-h57.
- 33 512 28. Bicakli DH, Varol U, Degirmenci M, Tunali D, Cakar B, Durusoy R, et al. Adjuvant  
34 513 chemotherapy may contribute to an increased risk for metabolic syndrome in patients with  
35 514 breast cancer. *J Oncol Pharm Pract*. 2016;22(1):46-53.
- 36 515 29. Rzymowska J. Effect of cytotoxic chemotherapy on serum lipid levels in breast cancer  
37 516 patients. *Pathobiology*. 1999;67(3):129-32.
- 38 517 30. Huxley R, Lewington S, Clarke R. Cholesterol, coronary heart disease and stroke: a  
39 518 review of published evidence from observational studies and randomized controlled trials.  
40 519 *Semin Vasc Med*. 2002;2(3):315-23.
- 41 520 31. Averina M, Nilssen O, Brenn T, Brox J, Arkhipovsky VL, Kalinin AG. Factors behind the  
42 521 increase in cardiovascular mortality in Russia: apolipoprotein AI and B distribution in the  
43 522 Arkhangelsk study 2000. *Clin Chem*. 2004;50(2):346-54.
- 44 523 32. Li X, Liu ZL, Wu YT, Wu H, Dai W, Arshad B, et al. Status of lipid and lipoprotein in  
45 524 female breast cancer patients at initial diagnosis and during chemotherapy. *Lipids Health Dis*.  
46 525 2018;17(1):91.
- 47 526 33. Kalábová H, Melichar B, Ungermann L, Doležal J, Krčmová L, Kašparová M, et al.  
48 527 Intima-media thickness, myocardial perfusion and laboratory risk factors of atherosclerosis in  
49 528 patients with breast cancer treated with anthracycline-based chemotherapy. *Med Oncol*.  
50 529 2011;28(4):1281-7.
- 51 530 34. Lu Q, Wu X, Zhu Y, Yang J, Wang X, Ye C, et al. Effects of Chemotherapy on Serum  
52 531 Lipids in Chinese Postoperative Breast Cancer Patients. *Cancer Manag Res*. 2020;12:8397-  
53 532 408.
- 54  
55  
56  
57  
58  
59  
60



- 1  
2  
3 533 35. Zhang L, Bennett WF, Zheng T, Ouyang PK, Ouyang X, Qiu X, et al. Effect of  
4 534 Cholesterol on Cellular Uptake of Cancer Drugs Pirarubicin and Ellipticine. *J Phys Chem B*.  
5 535 2016;120(12):3148-56.  
6 536 36. Blanco JG, Sun CL, Landier W, Chen L, Esparza-Duran D, Leisenring W, et al.  
7 537 Anthracycline-related cardiomyopathy after childhood cancer: role of polymorphisms in carbonyl  
8 538 reductase genes--a report from the Children's Oncology Group. *J Clin Oncol*. 2012;30(13):1415-  
9 539 21.  
10 540 37. Hamirani Y, Fanous I, Kramer CM, Wong A, Salerno M, Dillon P. Anthracycline- and  
11 541 trastuzumab-induced cardiotoxicity: a retrospective study. *Med Oncol*. 2016;33(7):82.  
12 542 38. Szmit S, Jurczak W, Zaucha JM, Drozd-Sokołowska J, Spychałowicz W, Joks M, et al.  
13 543 Pre-existing arterial hypertension as a risk factor for early left ventricular systolic dysfunction  
14 544 following (R)-CHOP chemotherapy in patients with lymphoma. *J Am Soc Hypertens*.  
15 545 2014;8(11):791-9.  
16 546 39. Shah P, Garris R, Abboud R, Vasudev R, Patel H, Doshi R, et al. Meta-Analysis  
17 547 Comparing Usefulness of Beta Blockers to Preserve Left Ventricular Function During  
18 548 Anthracycline Therapy. *Am J Cardiol*. 2019;124(5):789-94.  
19 549 40. Dong H, Yao L, Wang M, Wang M, Li X, Sun X, et al. Can ACEI/ARB prevent the  
20 550 cardiotoxicity caused by chemotherapy in early-stage breast cancer?-a meta-analysis of  
21 551 randomized controlled trials. *Transl Cancer Res*. 2020;9(11):7034-43.  
22 552 41. Feng M, Darabi M, Tubeuf E, Canicio A, Lhomme M, Frisdal E, et al. Free cholesterol  
23 553 transfer to high-density lipoprotein (HDL) upon triglyceride lipolysis underlies the U-shape  
24 554 relationship between HDL-cholesterol and cardiovascular disease. *Eur J Prev Cardiol*.  
25 555 2020;27(15):1606-16.  
26 556  
27 557  
28  
29

## 30 558 **FIGURE LEGENS**

31 559 **Figure 1. (a)** Timeline of high-density lipoprotein cholesterol (HDL-C) levels in patients  
32 560 detected anthracycline-induced subclinical cardiotoxicity (AISC) at four time points. 12 patients  
33 561 were detected AISC at the end of the 3rd cycle of chemotherapy. 7 patients were detected AISC  
34 562 at the end of the 6th cycle of chemotherapy. 3 patients were detected AISC at 6 months after  
35 563 treatment completion. 2 patients were detected AISC at 12 months after treatment completion.  
36 564 **(b)** Timeline of HDL-C levels of patients without AISC.

37 565 **Figure 2.** Timeline of high-density lipoprotein cholesterol (HDL-C) levels **(a)** and global  
38 566 longitudinal strain (GLS) **(b)** in patients with and without anthracycline-induced subclinical  
39 567 cardiotoxicity (AISC) during the whole follow-up period.

40 568 **Figure 3. (a)** Changes of high-density lipoprotein cholesterol (HDL-C) in all patients from  
41 569 baseline to the end of the 6th cycle of chemotherapy. **(b)** Changes of HDL-C in patients with  
42 570 anthracycline-induced subclinical cardiotoxicity (AISC). **(c)** Changes of HDL-C in patients  
43 571 without AISC.

44 572 **Figure 4.** High-density lipoprotein cholesterol (HDL-C) differences between anthracycline-  
45 573 induced subclinical cardiotoxicity (AISC) and No-AISC. **(a)** Highest level of HDL-C during  
46 574 chemotherapy. **(b)**The HDL-C value increment from baseline to the highest value. **(c)** The lowest  
47 575 level of HDL-C during chemotherapy. **(d)** The HDL-C value declined from baseline to the  
48 576 lowest.

1  
2  
3 577 **Figure S1.** Flow diagram of patients enrolled in our observational research and reasons for  
4 578 censored patients.

5  
6 579 **Figure S2.** Kaplan-Meier curves of the percentage of patients without AISC in patients stratified  
7 580 by HDL-C level (**a**) and ApoA1 level (**b**). High HDL-C: HDL-C  $\geq$  1.16mmol/L. Low HDL-C:  
8 HDL-C < 1.16mmol/L. High ApoA1: ApoA1  $\geq$  1.02g/L. Low ApoA1: ApoA1 < 1.02g/L. AISC,  
9 581 anthracycline-induced cardiotoxicity; ApoA1, apolipoprotein A1; HDL-C, high-density  
10 582 lipoprotein cholesterol; HR, hazard ratio.  
11 583  
12 584  
13 585

14  
15  
16  
17  
18  
19  
20  
21  
22  
23  
24  
25  
26  
27  
28  
29  
30  
31  
32  
33  
34  
35  
36  
37  
38  
39  
40  
41  
42  
43  
44  
45  
46  
47  
48  
49  
50  
51  
52  
53  
54  
55  
56  
57  
58  
59  
60

For peer review only

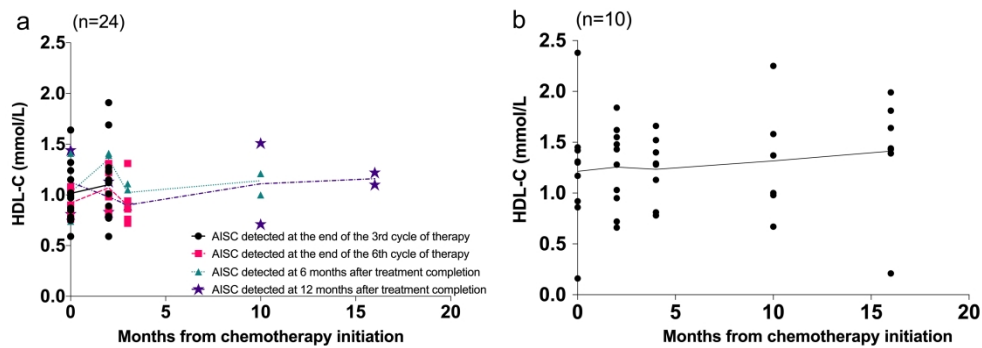

Figure 1. (a) Timeline of high-density lipoprotein cholesterol (HDL-C) levels in patients detected anthracycline-induced subclinical cardiotoxicity (AISC) at four time points. 12 patients were detected AISC at the end of the 3rd cycle of chemotherapy. 7 patients were detected AISC at the end of the 6th cycle of chemotherapy. 3 patients were detected AISC at 6 months after treatment completion. 2 patients were detected AISC at 12 months after treatment completion. (b) Timeline of HDL-C levels of patients without AISC.

420x144mm (300 x 300 DPI)

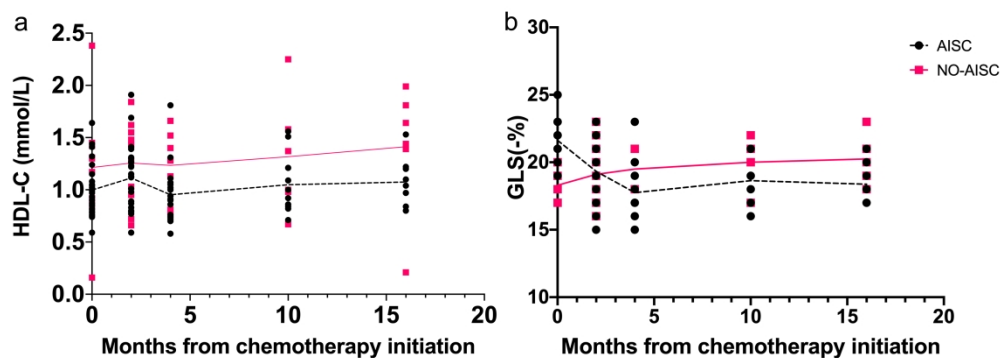

Figure 2. Timeline of high-density lipoprotein cholesterol (HDL-C) levels (a) and global longitudinal strain (GLS) (b) in patients with and without anthracycline-induced subclinical cardiotoxicity (AISC) during the whole follow-up period.

325x117mm (300 x 300 DPI)

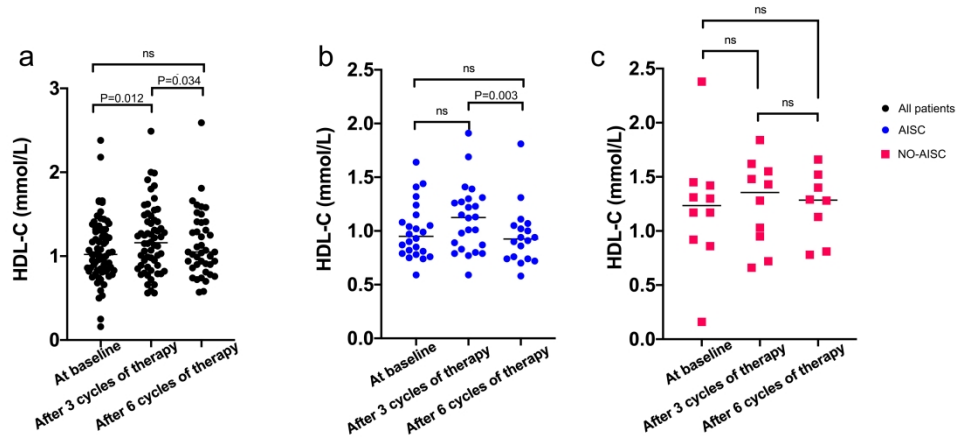

Figure 3. (a) Changes of high-density lipoprotein cholesterol (HDL-C) in all patients from baseline to the end of the 6th cycle of chemotherapy. (b) Changes of HDL-C in patients with anthracycline-induced subclinical cardiotoxicity (AISC). (c) Changes of HDL-C in patients without AISC.

365x166mm (300 x 300 DPI)

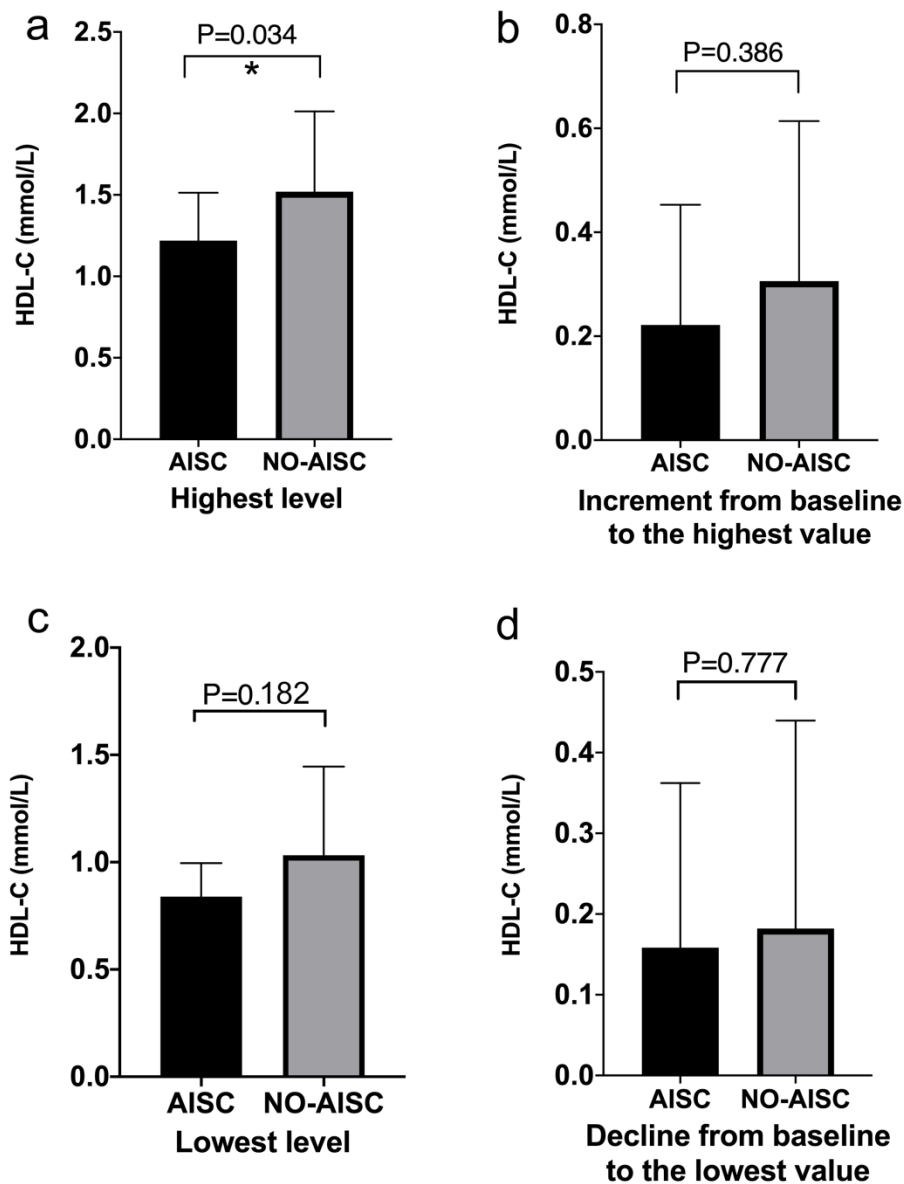

Figure 4. High-density lipoprotein cholesterol (HDL-C) differences between anthracycline-induced subclinical cardiotoxicity (AISC) and No-AISC. (a) Highest level of HDL-C during chemotherapy. (b) The HDL-C value increment from baseline to the highest value. (c) The lowest level of HDL-C during chemotherapy. (d) The HDL-C value declined from baseline to the lowest.

206x267mm (300 x 300 DPI)

1  
2  
3  
4  
5  
6  
7  
8  
9  
10  
11  
12  
13  
14  
15  
16  
17  
18  
19  
20  
21  
22  
23  
24  
25  
26  
27  
28  
29  
30  
31  
32  
33  
34  
35  
36  
37  
38  
39  
40  
41  
42  
43  
44  
45  
46  
47  
48  
49  
50  
51  
52  
53  
54  
55  
56  
57  
58  
59  
60

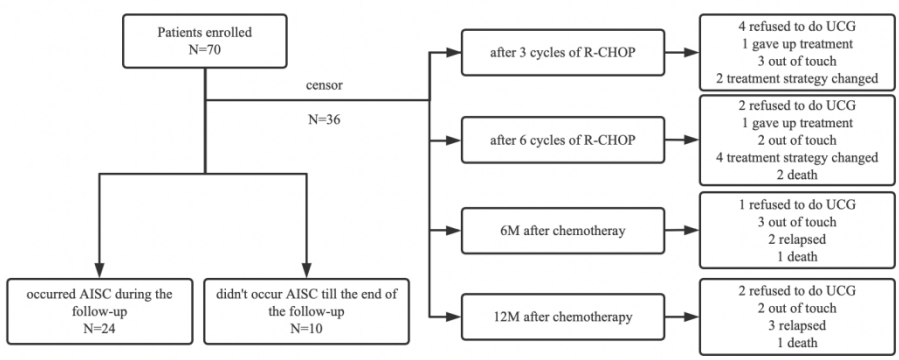

325x126mm (144 x 144 DPI)

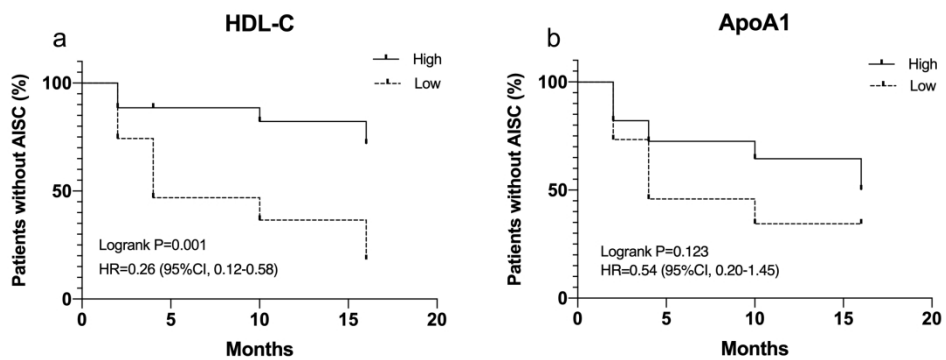

214x78mm (300 x 300 DPI)



Table S1. Baseline clinical characteristics of patients enrolled

|                            | Total cohort<br>n=70  | Low HDL-C*<br>n=42    | High HDL-C*<br>n=28   | P-value          |
|----------------------------|-----------------------|-----------------------|-----------------------|------------------|
| Age (year)                 | 55.03±14.79           | 52.48±16.11           | 58.86±11.83           | 0.077            |
| Male/Female (n)            | 34/36                 | 22/20                 | 12/16                 | 0.435            |
| BMI (kg/m <sup>2</sup> )   | 23.08±3.33            | 23.51±3.29            | 22.43±3.33            | 0.183            |
| ECoG performance status    |                       |                       |                       | 0.465            |
| 0 (%)                      | 37 (52.86)            | 22 (52.38)            | 15 (53.57)            |                  |
| 1 (%)                      | 24 (34.29%)           | 13 (30.95)            | 11 (39.28)            |                  |
| 2 (%)                      | 9 (12.85)             | 7 (16.67)             | 2 (7.14)              |                  |
| Hypertension (%)           | 9 (12.86)             | 5 (11.90)             | 4 (14.28)             | 1.000            |
| Antihypertensive treatment | 9 (12.86)             | 5 (11.90)             | 4 (14.28)             | 1.000            |
| ACEI/ARB                   | 5                     | 2                     | 3                     |                  |
| Beta-blockers              | 4                     | 3                     | 1                     |                  |
| Diabetes mellitus (%)      | 5 (7.14)              | 3 (7.14)              | 2 (7.14)              | 1.000            |
| Smoking (%)                | 21 (30.00)            | 10 (23.81)            | 11 (39.28)            | 0.166            |
| Drinking (%)               | 18 (25.71)            | 7 (16.67)             | 11 (39.28)            | <b>0.034</b>     |
| Heart rate                 | 80.67±10.61           | 81.50±11.04           | 79.43±10.02           | 0.428            |
| LVEF (%)                   | 65.5 (63.0, 67.0)     | 65.0 (63.0, 67.0)     | 66.0 (63.2, 67.8)     | 0.522            |
| FS (%)                     | 35.67±2.10            | 35.60±2.14            | 35.79±2.08            | 0.713            |
| GLS ( -% )                 | 20.0 (19.0, 22.0)     | 21.0 (19.0, 22.0)     | 20.0 (18.2, 21.0)     | 0.167            |
| LVDd (mm)                  | 46.30±3.50            | 46.93±3.44            | 45.36±3.43            | 0.065            |
| LVMi (g/m <sup>2</sup> )   | 94.72±17.55           | 96.79±18.54           | 91.62±15.76           | 0.230            |
| E (cm/s)                   | 69.12±13.12           | 69.71±12.79           | 68.23±13.80           | 0.647            |
| e'(cm/s)                   | 7.60±2.15             | 7.60±2.07             | 7.59±2.30             | 0.987            |
| E/e'                       | 9.61±2.41             | 9.66±2.30             | 9.53±2.59             | 0.832            |
| NT-proBNP (ng/L)           | 62.50 (31.25, 132.25) | 51.00 (29.00, 128.75) | 79.00 (41.75, 168.50) | 0.171            |
| cTnT ( ng/mL )             | 0.004 (0.000, 0.006)  | 0.004 (0.002, 0.007)  | 0.004 (0.000, 0.005)  | 0.509            |
| HsCRP                      | 2.61 (1.00, 15.64)    | 4.04 (1.17, 20.00)    | 1.95 (0.76, 14.51)    | 0.161            |
| TC (mmol/L)                | 4.09±0.93             | 3.86±0.97             | 4.44±0.76             | <b>0.011</b>     |
| TG (mmol/L)                | 1.40 (0.97, 1.68)     | 1.51 (1.19, 1.93)     | 1.10 (0.82, 1.50)     | <b>0.002</b>     |
| LDL (mmol/L)               | 2.55±0.77             | 2.42±0.80             | 2.75±0.69             | 0.084            |
| HDL-C (mmol/L)             | 1.08±0.38             | 0.84±0.21             | 1.44±0.28             | <b>&lt;0.001</b> |
| ApoA1 (g/L)                | 1.17±0.34             | 1.01±0.25             | 1.40±0.32             | <b>&lt;0.001</b> |

Values are expressed as mean±standard deviation, n (%), or median (Q1-Q3). Bold values indicate statistical significance.

\* Low HDL-C: HDL-C<1.16mmol/L; High HDL-C: HDL-C≥1.16mmol/L. ApoA1 values were available in 63 patients. ApoA1: apolipoprotein A1; BMI: body mass index; cTnT: cardiac troponin T; ECoG: Eastern Cooperative Oncology Group; FS: fractional shortening; GLS: global longitudinal peak systolic strain; HDL-C: high-density lipoprotein cholesterol; HsCRP: high sensitivity C-reactive protein; LVEF: left ventricular ejection fraction; LVDd: left ventricular diastolic dimension; LVMi: left ventricular mass index; LDL-C: low-density

1  
2  
3 lipoprotein cholesterol; NT-proBNP: N terminal-pro brain natriuretic peptide; TC: total cholesterol; TG: total  
4 triglyceride.  
5  
6  
7  
8  
9  
10  
11  
12  
13  
14  
15  
16  
17  
18  
19  
20  
21  
22  
23  
24  
25  
26  
27  
28  
29  
30  
31  
32  
33  
34  
35  
36  
37  
38  
39  
40  
41  
42  
43  
44  
45  
46  
47  
48  
49  
50  
51  
52  
53  
54  
55  
56  
57  
58  
59  
60

Table S2. Univariable Cox regression analysis of enrolled patients.

| Variables                    | Univariate analysis |             | P values         |
|------------------------------|---------------------|-------------|------------------|
|                              | HR                  | 95%CI       |                  |
| Age, per 1 year              | 0.97                | 0.943-0.998 | <b>0.034</b>     |
| Female vs Male               | 1.41                | 0.63-3.19   | 0.404            |
| BMI, per 1 kg/m <sup>2</sup> | 1.09                | 0.97-1.22   | 0.139            |
| ECoG, 0 or 1 vs status 2     | 0.63                | 0.30-1.32   | 0.220            |
| Hypertension, yes vs no      | 0.22                | 0.03-1.62   | 0.136            |
| Diabetes mellitus, yes vs no | 0.35                | 0.05-2.61   | 0.307            |
| Smoking, yes vs no           | 0.77                | 0.31-1.96   | 0.589            |
| Drinking, yes vs no          | 0.84                | 0.31-2.26   | 0.728            |
| Heart rate, per 1 bp         | 0.99                | 0.96-1.03   | 0.645            |
| LVEF, per 1%                 | 1.09                | 0.94-1.25   | 0.250            |
| FS, per 1%                   | 1.13                | 0.93-1.37   | 0.219            |
| GLS, per -1%                 | 1.46                | 1.20-1.77   | <b>&lt;0.001</b> |
| LVDd, per 1 mm               | 1.05                | 0.93-1.19   | 0.425            |
| LVMi, per 1 g/m <sup>2</sup> | 1.00                | 0.97-1.02   | 0.762            |
| E, per 1 cm/s                | 1.03                | 1.00-1.06   | 0.075            |
| e', per 1 cm/s               | 1.14                | 0.94-1.40   | 0.189            |
| E/e', per 1                  | 0.97                | 0.81-1.16   | 0.752            |
| NT-proBNP, per 1 ng/L        | 1.00                | 0.99-1.00   | 0.153            |
| cTnT, per lg1 ng/mL          | 1.19                | 0.83-1.72   | 0.340            |
| HsCRP, per 1                 | 1.02                | 0.97-1.07   | 0.453            |
| TC, per 1 mmol/L             | 0.78                | 0.51-1.20   | 0.259            |
| TG, per 1 mmol/L             | 0.93                | 0.55-1.58   | 0.796            |
| LDL-C, per 1 mmol/L          | 0.94                | 0.56-1.55   | 0.795            |
| HDL-C group (high vs low)    | 0.24                | 0.09-0.67   | <b>0.006</b>     |
| ApoA1 group (high vs low)    | 0.54                | 0.22-1.29   | 0.165            |

High HDL-C group: HDL-C $\geq$ 1.16mmol/L. Low HDL-C group: HDL-C<1.16mmol/L. High ApoA1 group: ApoA1 $\geq$ 1.02g/L.

ApoA1: apolipoprotein A1; BMI: body mass index; cTnT: cardiac troponin T; ECoG: Eastern Cooperative Oncology Group; FS: fractional shortening; GLS: global longitudinal peak systolic strain; HDL-C: high-density lipoprotein cholesterol; HsCRP: high sensitivity C-reactive protein; LVEF: left ventricular ejection fraction; LVDd: left ventricular diastolic dimension; LVMi: left ventricular mass index; LDL-C: low-density lipoprotein cholesterol; NT-proBNP: N terminal-pro brain natriuretic peptide; TC: total cholesterol; TG: total triglyceride.

Table S3. Baseline clinical characteristics of un-censored patients with or without AISC.

|                            | Total cohort          | NO-AISC               | AISC                  | P-value          |
|----------------------------|-----------------------|-----------------------|-----------------------|------------------|
|                            | n=34                  | n=10                  | n=24                  |                  |
| Age (year)                 | 52.85±12.37           | 59.7±9.67             | 50.0±12.45            | <b>0.035</b>     |
| Male/Female (n)            | 19/15                 | 5/5                   | 14/10                 | 0.947            |
| BMI (kg/m <sup>2</sup> )   | 24.01±3.21            | 23.67±3.83            | 24.15±3.00            | 0.698            |
| ECOG performance status    |                       |                       |                       | 1.000            |
| 0 (%)                      | 23 (67.65)            | 7 (70.00)             | 16 (66.67)            |                  |
| 1 (%)                      | 7 (20.59)             | 2 (20.00)             | 5 (20.83)             |                  |
| 2 (%)                      | 4 (11.76)             | 1 (10.00)             | 3 (12.50)             |                  |
| Hypertension (%)           | 4 (11.76)             | 3 (30.00)             | 1 (4.17)              | 0.122            |
| Antihypertensive treatment | 4 (11.76)             | 3 (30.00)             | 1 (4.17)              | 0.122            |
| ACEI/ARB                   | 3                     | 2                     | 1                     |                  |
| Beta-blockers              | 1                     | 1                     | 0                     |                  |
| Diabetes mellitus (%)      | 3 (8.82)              | 2 (20.00)             | 1 (4.17)              | 0.412            |
| Smoking (%)                | 11 (32.35)            | 5 (50.00)             | 6 (25.00)             | 0.309            |
| Drinking (%)               | 7 (20.59)             | 2 (20.00)             | 5 (20.83)             | 1.000            |
| Heart rate                 | 81.03±11.08           | 84.60±13.53           | 79.54±9.83            | 0.231            |
| LVEF (%)                   | 65.0 (63.0, 67.0)     | 64.0 (62.0, 67.3)     | 66.0 (64.0, 67.0)     | 0.270            |
| FS (%)                     | 35.74±2.12            | 35.10±2.28            | 36.0±2.04             | 0.266            |
| GLS ( -% )                 | 21.0 (19.0, 22.0)     | 18.0 (17.0, 20.0)     | 22.0 (21.0, 22.8)     | <b>&lt;0.001</b> |
| LVDd (mm)                  | 46.62±3.08            | 45.61±3.41            | 47.04±2.90            | 0.218            |
| LVMi (g/m <sup>2</sup> )   | 94.04±16.26           | 93.27±18.87           | 94.36±15.78           | 0.862            |
| E (cm/s)                   | 70.87±12.84           | 66.43±11.78           | 72.73±13.04           | 0.197            |
| e' (cm/s)                  | 7.59±1.77             | 6.90±1.88             | 7.88±1.68             | 0.144            |
| E/e'                       | 9.66±2.17             | 9.95±1.79             | 9.54±2.34             | 0.626            |
| NT-proBNP (ng/L)           | 46.00 (28.50, 109.00) | 78.50 (31.50, 133.25) | 41.00 (28.00, 122.00) | 0.308            |
| cTnT ( ng/mL )             | 0.004 (0.000, 0.007)  | 0.004 (0.000, 0.008)  | 0.004 (0.000, 0.007)  | 0.816            |
| HsCRP                      | 2.28 (0.95, 17.18)    | 1.62 (0.54, 13.79)    | 3.84 (1.21, 20.00)    | 0.216            |
| TC (mmol/L)                | 4.07±0.95             | 4.38±1.31             | 3.95±0.75             | 0.219            |
| TG (mmol/L)                | 1.40 (1.12, 1.63)     | 1.54 (1.67, 1.85)     | 1.38 (1.10, 1.56)     | 0.344            |
| LDL-C (mmol/L)             | 2.59±0.83             | 2.73±1.15             | 2.53±0.68             | 0.530            |
| HDL-C (mmol/L)             | 1.06±0.38             | 1.21±0.56             | 1.00±0.26             | 0.128            |
| HDL-C group*               |                       |                       |                       | <b>0.019</b>     |
| High (%)                   | 12 (35.29)            | 7 (70.00)             | 5 (20.83)             |                  |
| Low (%)                    | 22 (64.71)            | 3 (30.00)             | 19 (79.17)            |                  |
| ApoA1 (g/L)                | 1.19±0.34             | 1.35±0.44             | 1.12±0.26             | 0.068            |
| ApoA1 group#               |                       |                       |                       | 0.266            |
| High (%)                   | 23 (71.88)            | 9 (90.0)              | 14 (63.64)            |                  |
| Low (%)                    | 9 (28.12)             | 1 (10.0)              | 8 (36.36)             |                  |

\*High HDL-C: HDL-C $\geq$ 1.16mmol/L. Low HDL-C: HDL-C $<$ 1.16mmol/L. # High ApoA1: ApoA1 $\geq$ 1.02g/L. Low ApoA1: ApoA1 $<$ 1.02g/L. ApoA1 values were available in 32 patients.

AISC: anthracycline-induced subclinical cardiotoxicity; ApoA1: apolipoprotein A1; AST: aspartate

1  
2  
3 transaminase; ALT: alanine aminotransferase; BMI: body mass index; cTnT: cardiac troponin T; ECoG:  
4 Eastern Cooperative Oncology Group; FS: fractional shortening; GLS: global longitudinal peak systolic  
5 strain; HDL-C: high-density lipoprotein cholesterol; HsCRP: high sensitivity C-reactive protein; LVEF:  
6 left ventricular ejection fraction; LVDd: left ventricular diastolic dimension; LVMI: left ventricular mass  
7 index; LDL-C: low-density lipoprotein cholesterol; NT-proBNP: N terminal-pro brain natriuretic peptide;  
8 TC: total cholesterol; TG: total triglyceride.  
9  
10  
11  
12  
13  
14  
15  
16  
17  
18  
19  
20  
21  
22  
23  
24  
25  
26  
27  
28  
29  
30  
31  
32  
33  
34  
35  
36  
37  
38  
39  
40  
41  
42  
43  
44  
45  
46  
47  
48  
49  
50  
51  
52  
53  
54  
55  
56  
57  
58  
59  
60

For peer review only

STROBE Statement—Checklist of items that should be included in reports of *cohort studies*

|                              | Item No | Recommendation                                                                                                                                                                                                                                                                                                         | Page No |
|------------------------------|---------|------------------------------------------------------------------------------------------------------------------------------------------------------------------------------------------------------------------------------------------------------------------------------------------------------------------------|---------|
| <b>Title and abstract</b>    | 1       | (a) Indicate the study's design with a commonly used term in the title or the abstract<br>(b) Provide in the abstract an informative and balanced summary of what was done and what was found                                                                                                                          | 1       |
| <b>Introduction</b>          |         |                                                                                                                                                                                                                                                                                                                        |         |
| Background/rationale         | 2       | Explain the scientific background and rationale for the investigation being reported                                                                                                                                                                                                                                   | 2       |
| Objectives                   | 3       | State specific objectives, including any prespecified hypotheses                                                                                                                                                                                                                                                       | 2       |
| <b>Methods</b>               |         |                                                                                                                                                                                                                                                                                                                        |         |
| Study design                 | 4       | Present key elements of study design early in the paper                                                                                                                                                                                                                                                                | 3       |
| Setting                      | 5       | Describe the setting, locations, and relevant dates, including periods of recruitment, exposure, follow-up, and data collection                                                                                                                                                                                        | 3       |
| Participants                 | 6       | (a) Give the eligibility criteria, and the sources and methods of selection of participants. Describe methods of follow-up<br>(b) For matched studies, give matching criteria and number of exposed and unexposed                                                                                                      | 3       |
| Variables                    | 7       | Clearly define all outcomes, exposures, predictors, potential confounders, and effect modifiers. Give diagnostic criteria, if applicable                                                                                                                                                                               | 4       |
| Data sources/<br>measurement | 8*      | For each variable of interest, give sources of data and details of methods of assessment (measurement). Describe comparability of assessment methods if there is more than one group                                                                                                                                   | 4       |
| Bias                         | 9       | Describe any efforts to address potential sources of bias                                                                                                                                                                                                                                                              | NA      |
| Study size                   | 10      | Explain how the study size was arrived at                                                                                                                                                                                                                                                                              | 3       |
| Quantitative variables       | 11      | Explain how quantitative variables were handled in the analyses. If applicable, describe which groupings were chosen and why                                                                                                                                                                                           | 3       |
| Statistical methods          | 12      | (a) Describe all statistical methods, including those used to control for confounding<br>(b) Describe any methods used to examine subgroups and interactions<br>(c) Explain how missing data were addressed<br>(d) If applicable, explain how loss to follow-up was addressed<br>(e) Describe any sensitivity analyses | 4       |
| <b>Results</b>               |         |                                                                                                                                                                                                                                                                                                                        |         |
| Participants                 | 13*     | (a) Report numbers of individuals at each stage of study—eg numbers potentially eligible, examined for eligibility, confirmed eligible, included in the study, completing follow-up, and analysed<br>(b) Give reasons for non-participation at each stage<br>(c) Consider use of a flow diagram                        | 4       |
| Descriptive data             | 14*     | (a) Give characteristics of study participants (eg demographic, clinical, social) and information on exposures and potential confounders<br>(b) Indicate number of participants with missing data for each variable of interest<br>(c) Summarise follow-up time (eg, average and total amount)                         | 4       |
| Outcome data                 | 15*     | Report numbers of outcome events or summary measures over time                                                                                                                                                                                                                                                         | 6       |

|    |                          |    |                                                                                                                                                                                                              |        |
|----|--------------------------|----|--------------------------------------------------------------------------------------------------------------------------------------------------------------------------------------------------------------|--------|
| 1  | Main results             | 16 | (a) Give unadjusted estimates and, if applicable, confounder-adjusted estimates and their precision (eg, 95% confidence interval). Make clear which confounders were adjusted for and why they were included | 6,7    |
| 2  |                          |    |                                                                                                                                                                                                              |        |
| 3  |                          |    | (b) Report category boundaries when continuous variables were categorized                                                                                                                                    |        |
| 4  |                          |    | (c) If relevant, consider translating estimates of relative risk into absolute risk for a meaningful time period                                                                                             |        |
| 5  | Other analyses           | 17 | Report other analyses done—eg analyses of subgroups and interactions, and sensitivity analyses                                                                                                               | 7,8    |
| 6  |                          |    |                                                                                                                                                                                                              |        |
| 7  |                          |    |                                                                                                                                                                                                              |        |
| 8  |                          |    |                                                                                                                                                                                                              |        |
| 9  |                          |    |                                                                                                                                                                                                              |        |
| 10 |                          |    |                                                                                                                                                                                                              |        |
| 11 | <b>Discussion</b>        |    |                                                                                                                                                                                                              |        |
| 12 | Key results              | 18 | Summarise key results with reference to study objectives                                                                                                                                                     | 8      |
| 13 | Limitations              | 19 | Discuss limitations of the study, taking into account sources of potential bias or imprecision. Discuss both direction and magnitude of any potential bias                                                   | 10     |
| 14 |                          |    |                                                                                                                                                                                                              |        |
| 15 | Interpretation           | 20 | Give a cautious overall interpretation of results considering objectives, limitations, multiplicity of analyses, results from similar studies, and other relevant evidence                                   | 8,9,10 |
| 16 |                          |    |                                                                                                                                                                                                              |        |
| 17 | Generalisability         | 21 | Discuss the generalisability (external validity) of the study results                                                                                                                                        | 10     |
| 18 |                          |    |                                                                                                                                                                                                              |        |
| 19 |                          |    |                                                                                                                                                                                                              |        |
| 20 |                          |    |                                                                                                                                                                                                              |        |
| 21 | <b>Other information</b> |    |                                                                                                                                                                                                              |        |
| 22 | Funding                  | 22 | Give the source of funding and the role of the funders for the present study and, if applicable, for the original study on which the present article is based                                                | 11     |
| 23 |                          |    |                                                                                                                                                                                                              |        |
| 24 |                          |    |                                                                                                                                                                                                              |        |
| 25 |                          |    |                                                                                                                                                                                                              |        |

\*Give information separately for exposed and unexposed groups.

**Note:** An Explanation and Elaboration article discusses each checklist item and gives methodological background and published examples of transparent reporting. The STROBE checklist is best used in conjunction with this article (freely available on the Web sites of PLoS Medicine at <http://www.plosmedicine.org/>, Annals of Internal Medicine at <http://www.annals.org/>, and Epidemiology at <http://www.epidem.com/>). Information on the STROBE Initiative is available at <http://www.strobe-statement.org>.

# BMJ Open

## Role of HDL-C in anthracycline-induced subclinical cardiotoxicity: an observational prospective study in DLBCL patients

|                                 |                                                                                                                                                                                                                                                                                                                                                                                                                                                                                                                                                                                                                                                                                                                                                                                                                                                                                                                                                                 |
|---------------------------------|-----------------------------------------------------------------------------------------------------------------------------------------------------------------------------------------------------------------------------------------------------------------------------------------------------------------------------------------------------------------------------------------------------------------------------------------------------------------------------------------------------------------------------------------------------------------------------------------------------------------------------------------------------------------------------------------------------------------------------------------------------------------------------------------------------------------------------------------------------------------------------------------------------------------------------------------------------------------|
| Journal:                        | <i>BMJ Open</i>                                                                                                                                                                                                                                                                                                                                                                                                                                                                                                                                                                                                                                                                                                                                                                                                                                                                                                                                                 |
| Manuscript ID                   | bmjopen-2023-074541.R1                                                                                                                                                                                                                                                                                                                                                                                                                                                                                                                                                                                                                                                                                                                                                                                                                                                                                                                                          |
| Article Type:                   | Original research                                                                                                                                                                                                                                                                                                                                                                                                                                                                                                                                                                                                                                                                                                                                                                                                                                                                                                                                               |
| Date Submitted by the Author:   | 30-Oct-2023                                                                                                                                                                                                                                                                                                                                                                                                                                                                                                                                                                                                                                                                                                                                                                                                                                                                                                                                                     |
| Complete List of Authors:       | Ou, Wenxin; The First Affiliated Hospital of Chongqing Medical University, Department of Hematology<br>Jiang, Tiantian; The First Affiliated Hospital of Chongqing Medical University, Department of Hematology<br>Zhang, Nan; The First Affiliated Hospital of Chongqing Medical University, Department of Cardiology<br>Lu, Kai; The First Affiliated Hospital of Chongqing Medical University, Department of Cardiology<br>Weng, Yue; The First Affiliated Hospital of Chongqing Medical University, Department of Hematology<br>Zhou, Xi; The First Affiliated Hospital of Chongqing Medical University, Department of Hematology<br>Wang, Dong; The First Affiliated Hospital of Chongqing Medical University, Department of Ultrasound<br>Dong, Qian; The First Affiliated Hospital of Chongqing Medical University, Department of Cardiology<br>Tang, Xiaoqiong; The First Affiliated Hospital of Chongqing Medical University, Department of Hematology |
| <b>Primary Subject Heading</b>: | Oncology                                                                                                                                                                                                                                                                                                                                                                                                                                                                                                                                                                                                                                                                                                                                                                                                                                                                                                                                                        |
| Secondary Subject Heading:      | Cardiovascular medicine, Medical management                                                                                                                                                                                                                                                                                                                                                                                                                                                                                                                                                                                                                                                                                                                                                                                                                                                                                                                     |
| Keywords:                       | Lymphoma < HAEMATOLOGY, CHEMOTHERAPY, CARDIOLOGY, Echocardiography < CARDIOLOGY                                                                                                                                                                                                                                                                                                                                                                                                                                                                                                                                                                                                                                                                                                                                                                                                                                                                                 |
|                                 |                                                                                                                                                                                                                                                                                                                                                                                                                                                                                                                                                                                                                                                                                                                                                                                                                                                                                                                                                                 |

SCHOLARONE™  
Manuscripts





I, the Submitting Author has the right to grant and does grant on behalf of all authors of the Work (as defined in the below author licence), an exclusive licence and/or a non-exclusive licence for contributions from authors who are: i) UK Crown employees; ii) where BMJ has agreed a CC-BY licence shall apply, and/or iii) in accordance with the terms applicable for US Federal Government officers or employees acting as part of their official duties; on a worldwide, perpetual, irrevocable, royalty-free basis to BMJ Publishing Group Ltd ("BMJ") its licensees and where the relevant Journal is co-owned by BMJ to the co-owners of the Journal, to publish the Work in this journal and any other BMJ products and to exploit all rights, as set out in our [licence](#).

The Submitting Author accepts and understands that any supply made under these terms is made by BMJ to the Submitting Author unless you are acting as an employee on behalf of your employer or a postgraduate student of an affiliated institution which is paying any applicable article publishing charge ("APC") for Open Access articles. Where the Submitting Author wishes to make the Work available on an Open Access basis (and intends to pay the relevant APC), the terms of reuse of such Open Access shall be governed by a Creative Commons licence – details of these licences and which [Creative Commons](#) licence will apply to this Work are set out in our licence referred to above.

Other than as permitted in any relevant BMJ Author's Self Archiving Policies, I confirm this Work has not been accepted for publication elsewhere, is not being considered for publication elsewhere and does not duplicate material already published. I confirm all authors consent to publication of this Work and authorise the granting of this licence.

# 1 Role of HDL-C in anthracycline-induced subclinical 2 cardiotoxicity: an observational prospective study in 3 DLBCL patients

4 Wenxin Ou<sup>1</sup>, Tiantian Jiang<sup>1</sup>, Nan Zhang<sup>2</sup>, Kai Lu<sup>2</sup>, Yue Weng<sup>1</sup>, Xi Zhou<sup>1</sup>, Dong Wang<sup>3</sup>, Qian  
5 Dong<sup>2\*</sup>, Xiaoqiong Tang<sup>1\*</sup>

6  
7  
8 <sup>1</sup> Department of Hematology, The First Affiliated Hospital of Chongqing Medical University,  
9 Chongqing, China

10 <sup>2</sup> Department of Cardiology, The First Affiliated Hospital of Chongqing Medical University,  
11 Chongqing, China

12 <sup>3</sup> Department of Ultrasound, The First Affiliated Hospital of Chongqing Medical University,  
13 Chongqing, China

14  
15 \*Corresponding Author: Qian Dong and Xiaoqiong Tang contributed equally to this work and  
16 are considered as co-corresponding authors.

17 Qian Dong<sup>2</sup>

18 1 Youyi Road, Yuzhong District, Chongqing, 400016, People's Republic of China

19 Email address: [203748@hospital.cqmu.edu.cn](mailto:203748@hospital.cqmu.edu.cn)

20 Xiaoqiong Tang<sup>1</sup>

21 1 Youyi Road, Yuzhong District, Chongqing, 400016, People's Republic of China

22 Email address: [tlscqmu@126.com](mailto:tlscqmu@126.com)

23  
24 **Keywords:** cardiotoxicity; DLBCL; anthracycline; HDL-C; GLS

## 25 26 **ABSTRACT**

27 **Objectives** Anthracycline-induced cardiotoxicity is a debilitating cardiac dysfunction for which  
28 there are no effective treatments, making early prevention of anthracycline-induced subclinical  
29 cardiotoxicity (AISC) crucial. High-density lipoprotein cholesterol (HDL-C) plays role in cardio-  
30 protection, but its impact on AISC remains unclear. Our study aims to elucidate the protective  
31 capacity of HDL-C in AISC in patients with diffuse large B-cell lymphoma (DLBCL) treated with  
32 R-CHOP.

33 **Design** Observational prospective study

34 **Setting** An institution in China from September 2020 to September 2022.

35 **Participant** 70 chemotherapy-naïve patients newly diagnosed with DLBCL who were scheduled  
36 to receive the standard dose of R-CHOP (cyclophosphamide, vincristine, doxorubicin, prednisone,  
37 and rituximab).

38 **Primary outcome measures** Serum biomarkers including HDL-C, 2D speckle tracking  
39 echocardiography, and conventional echocardiography were measured at baseline, at the end of  
40 the 3rd and 6th cycle of R-CHOP, and 6 and 12 months after the completion of chemotherapy.

41 **Results** 24 patients experienced AISC, while 10 did not. 36 patients were lost to follow-up. Cox  
42 regression analysis showed that higher levels of HDL-C were associated with a significantly lower  
43 risk of AISC (unadjusted, hazard ratio [HR]=0.24, 95%CI: 0.09-0.67, P=0.006; adjusted,  
44 HR=0.27, 95%CI: 0.09-0.79, P=0.017). Patients without AISC had a more stable and higher HDL-  
45 C level during the follow-up period. HDL-C levels were significantly decreased from the end of  
46 the 3rd cycle of chemotherapy to the end of the 6th cycle of chemotherapy in all patients (P=0.034),  
47 and particularly in the AISC group (P=0.003). The highest level of HDL-C was significantly higher  
48 in patients without AISC than in those with AISC (1.52±0.49 vs. 1.22±0.29, P=0.034).

49 **Conclusions** Our study suggests that higher levels of HDL-C may be associated with a lower risk  
50 of AISC in DLBCL patients treated with R-CHOP. HDL-C could be a cardio-protective target, but  
51 further research is needed to confirm its benefits and limitations.

52 **Study registration number** ChiCTR2100054721

#### 54 **Strengths and limitations of this study**

- 55 ● This observational prospective study contributes to our understanding of the association  
56 between HDL-C and AISC, offering a foundation for the development of early intervention  
57 and prevention strategies.
- 58 ● The study used advanced imaging techniques (2D-STE) to assess the subclinical cardiac  
59 dysfunction in the patients, which can provide more sensitive and accurate results compared  
60 to traditional echocardiography.
- 61 ● The study only included patients with DLBCL who received R-CHOP, which may limit the  
62 generalizability of the findings to patients with other types of cancer or chemotherapy  
63 regimens.
- 64 ● The relatively small sample size in this study may potentially impact the robustness and  
65 generalizability of our findings. Additional comprehensive studies, including both clinical  
66 and basic research, are necessary to fully evaluate the benefits and limitations of HDL-C as a  
67 cardio-protective strategy in anthracycline-treated cancer patients.

#### 69 **INTRODUCTION**

70 The improved management of cancer has led to a significant increase in the survival rate of cancer  
71 survivors(1). However, anthracycline, one of the most effective chemotherapeutic agents used to  
72 treat various cancers, is associated with potentially life-threatening and severe cardiovascular  
73 diseases(2). Studies have shown a significant increase in mortality in cancer patients with  
74 cardiovascular disease(3, 4). As advances in cancer treatment and an aging population continue,  
75 the number of patients with both conditions is rising(5). As a result, the field of cardio-oncology  
76 has become increasingly important in recent years.

77 Non-Hodgkin's lymphoma (NHL) is the 7th most common cancer in the United States and the  
78 most frequent hematologic malignancy globally, accounting for about 3% of cancer cases and

79 deaths(6). Among NHL, DLBCL is the most prevalent type, representing approximately one-third  
80 of all cases(7). The combination of cyclophosphamide, vincristine, doxorubicin, and prednisone  
81 with rituximab (R-CHOP) is a standard first-line therapy that has substantially improved survival  
82 outcomes in DLBCL patients(8). Nonetheless, anthracycline-containing chemotherapy agents are  
83 associated with cardiotoxicity, a major long-term adverse effect that significantly affects the  
84 quality of life and survival of cancer survivors.

85 Anthracycline-induced cardiotoxicity (AIC) is a devastating consequence of successful cancer  
86 treatment, often leading to hypokinetic cardiomyopathy and ultimately heart failure. AIC is an  
87 irreversible form of cardiac dysfunction for which no guidelines or accepted therapies for  
88 cardioprotection currently exist(9, 10). Therefore, early prevention and detection of AIC are  
89 crucial for providing opportunities for early intervention. Anthracycline-induced subclinical  
90 cardiotoxicity (AISC) is an early stage of AIC, characterized by abnormal echocardiography index  
91 without clinical symptoms(11). Early intervention is recommended by the 2022 International  
92 Cardio-Oncology Society (IC-OS) consensus statement once AISC is detected(12). Global  
93 longitudinal peak systolic strain (GLS) measured by 2D speckle tracking echocardiography can  
94 reliably identify most early myocardial deformation variations. In our study, we used early  
95 measurement of GLS to identify AISC(13, 14).

96 High-density lipoprotein (HDL) is the sole lipoprotein with protective attributes among the five  
97 types of lipoproteins. Its salutary effects include antioxidant, anti-inflammatory, and anti-apoptotic  
98 properties. Numerous preclinical investigations have suggested that HDL may have direct and  
99 indirect protective effects against AIC(15-17). The roles of HDL-cholesterol (HDL-C) and  
100 apolipoprotein A1 (ApoA1) in providing cardiovascular protection of HDL have been the subject  
101 of recent debate. Our team recently conducted a case-control study, revealing that both HDL-C  
102 and ApoA1 serve as predictive factors in patients with DLBCL treated with 3 cycles of (R)-  
103 CHOP(18). Nonetheless, further investigation is warranted to explore the clinical data pertaining  
104 to the association between HDL and anthracycline-related cardiotoxicity.

105 We undertook an observational prospective study to investigate the potential impact of HDL-C on  
106 AISC. Using 2D speckle tracking echocardiography, we identified AISC and sought to establish  
107 any correlation between HDL-C and AISC. Additionally, we assessed the fluctuations in HDL-C  
108 levels during R-CHOP chemotherapy in chemotherapy-naïve patients recently diagnosed with  
109 DLBCL.

110

## 111 **METHODS**

### 112 **Study population**

113 We recruited chemotherapy-naïve patients newly diagnosed with DLBCL who were scheduled to  
114 receive the standard dose of R-CHOP chemotherapy regimen at our institution from September  
115 1<sup>st</sup>, 2020, to September 1<sup>st</sup>, 2022. Our inclusion criteria were as follows: newly diagnosed DLBCL,  
116 age between 18 and 80 years, Eastern Cooperative Oncology Group (ECOG) performance status  
117  $\leq 2$ , left ventricular ejection fraction (LVEF)  $\geq 50\%$ , and acceptable bone marrow, renal, and  
118 hepatic functions for chemotherapy. Conversely, our exclusion criteria were symptomatic heart

1  
2  
3 119 failure, a history of myocardial ischemia, myocarditis, myocardial infarction, clinical or subclinical  
4 120 pericardial effusion, arrhythmia requiring medical intervention, a history of other cancers, under  
5 121 lipid-lowering treatment, and severe active infections such as syphilis, hepatitis, or human  
6 122 immunodeficiency virus (HIV) infection.

### 7 123 **Treatment**

8  
9  
10 124 Patients received a total of 6 cycles of standard R-CHOP (cyclophosphamide at 750 mg/m<sup>2</sup> on D1,  
11 125 doxorubicin at 50 mg/m<sup>2</sup> on D1, vincristine at 1.4 [maximum 2] mg/m<sup>2</sup> on D1, and 100 mg  
12 126 prednisone on D1-5, with rituximab at 375 mg/m<sup>2</sup> on D1 in each cycle), with or without 2 cycles  
13 127 of rituximab maintenance (rituximab at 375 mg/m<sup>2</sup> on D1 in each cycle).

### 14 128 **Definition of subclinical cardiotoxicity**

15  
16 129 According to the IC-OS consensus statement, the definition of subclinical cardiotoxicity was a  
17 130 relative GLS decrease from baseline [(baseline – current GLS)/baseline GLS] of >12%, but with  
18 131 a normal left ventricular ejection fraction (LVEF)(12).

### 19 132 **Study protocol**

20  
21 133 We defined 'baseline' as the initial assessment conducted before the initiation of the first cycle of  
22 134 chemotherapy. At baseline, the end of the 3rd cycle of R-CHOP, the end of the 6th cycle of R-  
23 135 CHOP, and 6 and 12 months after chemotherapy completion, all enrolled patients underwent  
24 136 conventional echocardiography, 2D speckle tracking echocardiography, and blood sampling.  
25  
26 137 Every patient received electrocardiography (ECG) examination before every cycle of  
27 138 chemotherapy to ensure the safety of the treatment. Demographic data and clinical variables,  
28 139 including age, gender, body mass index (BMI), ECOG performance status, diabetes mellitus,  
29 140 hypertension, drinking history (an adult who has consumed more than 20 drinks in lifetime, with  
30 141 each drink is considered to have an average alcohol content of 12 g), and smoking history (an adult  
31 142 who has smoked at least 100 cigarettes in their lifetime) were collected at the time of enrollment.  
32 143 Left ventricular systolic dysfunction was measured by LVEF, fractional shortening (FS), left  
33 144 ventricular mass index (LVMI), left ventricular diastolic dimension (LVDD), E, e', E/e', and GLS.  
34 145 HDL-C, low-density lipoprotein cholesterol (LDL-C), cardiac troponin T (cTnT), high sensitivity  
35 146 C-reactive protein (hsCRP), N-terminal pro-hormone of brain natriuretic peptide (NT-proBNP),  
36 147 total cholesterol (TC) and total triglyceride (TG) were measured. We used the baseline HDL-C  
37 148 level as a surrogate marker for HDL quantity. The patients were categorized into two groups based  
38 149 on the average HDL-C value for males and females in the modified criteria of the National  
39 150 Cholesterol Educated Program Adult Treatment Panel (NCEP ATP III)(19). High HDL-C was  
40 151 defined as a serum HDL-C ≥ 1.16 mmol/L, while low HDL-C was defined as a serum HDL-  
41 152 C < 1.16 mmol/L. We determined the sample size using an online sample size calculator, which  
42 153 indicated a total requirement of 23 events(20).

### 43 154 **Statistical analysis**

44 155 The study was conducted with two aims: firstly, to evaluate the relationship between HDL and  
45 156 AISC; and secondly, to conduct a preliminary exploration of the differences in HDL-C and the  
46 157 variability of HDL-C changes between patients with and without AISC during the follow-up  
47 158 period. Continuous variables were expressed as mean ± standard deviation (SD) and compared

1  
2  
3 159 using the t-test. Non-normally distributed variables were presented as median (Q1- Q3) and  
4 160 compared with the Wilcoxon Mann-Whitney test. Categorical variables were expressed as n (%)  
5 161 and compared using the Chi-square or Fisher's exact test, as appropriate. Correlation analysis was  
6 162 conducted to investigate the associations of change in HDL-C with change in GLS. The  
7 163 probabilities of survival were calculated using Kaplan-Meier methods and compared using Log-  
8 164 rank tests. Cox proportional-hazards regression models were conducted to assess the association  
9 165 between variables and AISC. Covariates for multivariable Cox regression models included age,  
10 166 sex, and variables that had a P-value of less than 0.15 in the univariable Cox regression analysis  
11 167 (GLS was excluded as it is the factor that defines AISC). Two multivariable Cox regression models  
12 168 were constructed: the first model included age and sex; and the second model included age, sex,  
13 169 hypertension, BMI, and E. Statistical analysis and visualization were performed using IBM SPSS  
14 170 V.22.0 and GraphPad Prism 8. Statistical tests were two-sided, with a P-value less than 0.05 being  
15 171 considered statically significant.

### 172 **Patient and public involvement**

173 Patients or the public were not involved in the design, or conduct, or reporting, or dissemination  
174 plans of our research.

## 175 **RESULTS**

### 176 **Assessment of the association between HDL-C and AISC**

#### 177 *Study population and baseline characteristics*

178 This investigation enrolled a total of 70 patients with chemotherapy-naïve DLBCL and were  
179 planned to be treated with the standard R-CHOP regimen. Based on the baseline HDL-C level, we  
180 segregated the patients into two groups: the high-level group (HDL-C  $\geq$  1.16mmol/L, n=28) and  
181 the low-level group (HDL-C < 1.16mmol/L, n=42). Patients with drinking history had a greater  
182 chance of having a high HDL-C level (P=0.034). The patients with high HDL-C showed  
183 substantially higher total cholesterol (P=0.011), and lower total triglyceride (P=0.002). The  
184 baseline characteristics of the patients in both groups were well balanced (Table S1).

#### 185 *High HDL-C was an independent protective target of anthracycline-induced subclinical 186 cardiotoxicity*

187 The clinical endpoint was defined as the first detection of AISC, and the median survival time of  
188 the whole cohort was 16 months. The median survival time of patients with low HDL-C was 4  
189 months, while that of patients with high HDL-C was not reached. The median follow-up time of  
190 the cohort was 10 months. During the follow-up period, 24 patients experienced AISC, while 10  
191 did not. Approximately half of the patients (n=36) were lost to follow-up. A flowchart detailing  
192 the patients enrolled in the study and the reasons for lost to follow-up patients can be found in  
193 Figure S1.

194 The log-rank test revealed that patients with higher HDL-C were less likely to experience AISC  
195 (P=0.001, HR=0.26, 95%CI: 0.12-0.58) (Figure S2).

198 According to the results of the univariable Cox regression analysis, variables that had a P-value of  
 199 less than 0.15 including age, BMI, hypertension, GLS, E, and HDL-C group. Increasing age was  
 200 significantly associated with a decreased HR of 0.97 (95%CI 0.943-0.998, P=0.034) per 1-year  
 201 increase. BMI showed a HR of 1.09 (95% CI 0.97-1.22, P=0.139) per 1 kg/m<sup>2</sup> increase. Similarly,  
 202 hypertension had a HR of 0.22 (95% CI 0.03-1.62, P=0.136) for yes versus no. A lower GLS was  
 203 significantly associated with an increased HR of 1.46 (95% CI 1.20-1.77, P<0.001) per -1%  
 204 decrease. E velocity showed a HR of 1.03 (95% CI 1.00-1.06, P=0.075) per 1 cm/s increase. The  
 205 HDL-C group (high versus low) had a significantly lower HR of 0.24 (95% CI 0.09-0.67,  
 206 P=0.006). Further details about other variables can be found in Table S2.

207 The results of the multivariable Cox regression analysis showed that high HDL-C was significantly  
 208 associated with a lower risk of AISC after adjusting for age and sex (model 1) (HR=0.28,  
 209 95%CI:0.10=0.84, P=0.018). Similarly, after adjusting for age, sex, and variables that P<0.15 in  
 210 the univariable Cox regression analysis (excluding GLS as it defines AISC) (model 2), the same  
 211 association was observed (HR=0.27, 95%CI: 0.09-0.79, P=0.017). (Table 1)

212 Table 1. Outcomes of study participants.

|            | HR (95%CI)<br>(unadjusted) | P values     | HR (95%CI)<br>(adjusted*) | P values     | HR (95%CI)<br>(adjusted#) | P values     |
|------------|----------------------------|--------------|---------------------------|--------------|---------------------------|--------------|
| Low HDL-C  | Ref                        |              | Ref                       |              | Ref                       |              |
| High HDL-C | 0.24 (0.09-0.67)           | <b>0.006</b> | 0.28 (0.10-0.80)          | <b>0.018</b> | 0.27 (0.09- 0.79)         | <b>0.017</b> |

213 The endpoint was defined as the first detection of anthracycline-induced subclinical  
 214 cardiotoxicity.

215 Low HDL-C: HDL-C<1.16mmol/L; High HDL-C: HDL-C≥1.16mmol/L. \*Adjusted for age and  
 216 sex. #Adjusted for age, sex, hypertension, body mass index, E. HR, hazard ratio; HDL-C, high-  
 217 density lipoprotein-cholesterol.

## 218 Preliminary exploration of the difference of HDL-C between patients with AISC and 219 without AISC

### 220 Study population and baseline characteristics

221 In this analysis, we selectively included 34 of the enrolled patients who were not lost to follow-  
 222 up. The patients who exhibited AISC at any time during the follow-up period were segregated into  
 223 the AISC group (n=24), while those who did not demonstrate AISC were classified into the NO-  
 224 AISC group (n=10). Patients within the AISC group were comparatively younger (50±12.45 vs.  
 225 59.7±9.67, P=0.035) and exhibited a higher baseline GLS [22.0 (21.0, 22.8) vs. 18.0 (17.0, 20.0),  
 226 P<0.001]. More baseline information can be seen in Table S3.

### 227 Timeline of HDL-C level in patients with and without AISC

228 Figure 1 displays the timeline of HDL-C levels in patients with and without AISC. In Figure 1a,  
 229 the patient population was categorized into four groups based on the time of AISC detection.  
 230 Among the groups, 12 patients were identified with AISC at the end of the 3rd cycle of  
 231 chemotherapy, 7 patients at the end of the 6th cycle, 3 patients at 6 months after treatment  
 232 completion, and 2 patients at 12 months after treatment completion. With the exception of the  
 233 group in which patients detected AISC at the end of the 3rd cycle of chemotherapy, all other groups  
 234 exhibited a reduction in HDL-C values from the end of the 3rd cycle of chemotherapy to the end  
 235

of the 6th cycle of chemotherapy. Figure 1b portrays the HDL-C level in patients without AISC, indicating that the HDL-C level was more stable than in patients with AISC. Moreover, the overall HDL-C level was higher in patients without AISC than in patients with AISC throughout the follow-up period (Figure 2a). In Figure 2b, there was a significant decrease in GLS during the chemotherapy period (from 0-4 months), which remained stable after completion of chemotherapy (after 4 months) in patients with AISC.

Based on Figure 2, we observed that the fluctuations in HDL-C and GLS were most pronounced during the chemotherapy period. The fluctuations in HDL-C levels of patients with DLBCL during R-CHOP chemotherapy were presented in Figure 3. The levels of HDL-C significantly increased for all patients from baseline to the end of the 3rd cycle of chemotherapy ( $P=0.012$ ) and significantly decreased from the end of the 3rd cycle to the end of the 6th cycle of chemotherapy ( $P=0.034$ ) (Figure 3a). Patients with AISC showed a significant decrease in HDL-C levels during R-CHOP chemotherapy from the end of the 3rd cycle to the end of the 6th cycle ( $P=0.003$ ) (Figure 3b). However, no significant difference was observed in HDL-C levels for patients without AISC during R-CHOP chemotherapy (Figure 3c). We conducted correlation analysis separately for the change in HDL-C and GLS from baseline to after 3 cycles of chemotherapy, from baseline to after 6 cycles of chemotherapy, and from after 3 cycles to after 6 cycles of chemotherapy. However, we found no statistically significant differences in the associations between changes in HDL-C and GLS ( $P=0.965, 0.087, 0.449$ ).

#### *Contrasting values of HDL-C parameters between patients with and without AISC*

Figure 4 presents the contrasting values between patients with AISC and those without in terms of four parameters, namely the highest and lowest levels of HDL-C during chemotherapy, the increment and decline in HDL-C values from baseline. Patients without AISC showed significantly higher values in the highest level of HDL-C ( $1.52\pm 0.49$  vs.  $1.22\pm 0.29$ ,  $P=0.034$ , Figure 4a). However, no significant differences were observed between the two groups in terms of HDL-C increment from baseline to the highest value ( $0.31\pm 0.31$  vs.  $0.22\pm 0.23$ ,  $P=0.386$ , Figure 4b). While the lowest level of HDL-C was lower in patients with AISC, the difference was not statistically significant ( $0.84\pm 0.16$  vs.  $1.03\pm 0.41$ ,  $P=0.182$ , Figure 4c). Furthermore, there were no significant differences in HDL-C decline between patients with AISC and those without ( $0.16\pm 0.20$  vs.  $0.18\pm 0.26$ ,  $P=0.777$ , Figure 4d).

## **DISCUSSION**

This prospective observational study investigated the relationship between HDL-C and incidence of AISC in 70 patients with DLBCL who were receiving anthracycline-containing chemotherapy. The study found that higher levels of HDL-C were associated with a lower incidence of AISC. Moreover, patients without AISC had more stable and higher levels of HDL-C than those with AISC during the follow-up period. The results also showed that HDL-C levels were significantly decreased from the end of the 3rd cycle of chemotherapy to the end of the 6th cycle of chemotherapy in all patients, especially in the AISC group, indicating that anthracycline-containing chemotherapy has adverse effects on HDL-C levels. Notably, the highest level of HDL-



1  
2  
3 276 C was significantly higher in patients without AISC compared to those with AISC. These findings  
4 277 suggest that HDL-C may have a protective role against AISC in DLBCL patients undergoing  
5 278 anthracycline-containing chemotherapy and maintaining a relatively high level of HDL-C may be  
6 279 more effective in managing cardio-protection than monitoring changes in HDL-C levels over time.  
7  
8 280 The results of this study highlight the importance of early serum lipid management in these  
9 281 patients.

10  
11 282 Lipoproteins are classified into five categories, namely chylomicron, very-low-density lipoprotein  
12 283 (VLDL), intermediate-density lipoprotein (IDL), low-density lipoprotein (LDL), and high-density  
13 284 lipoprotein (HDL), based on their size, density, and lipid composition (cholesterol and  
14 285 triglycerides)(21). Among these, HDL exhibits distinctive cytoprotective actions and triggers anti-  
15 286 oxidative, anti-inflammatory, and anti-apoptotic effects. The protective roles of HDL in  
16 287 cardiovascular disease have been controversial in recent years, and that the quality of HDL  
17 288 (cholesterol efflux capacity, antioxidant activity, anti-inflammatory activity, endothelial function,  
18 289 etc.) rather than the quantity of HDL has been proposed as the true cardioprotective effect. The  
19 290 Framingham Heart Study, as early as 1988, reported a correlation between HDL-C and  
20 291 cardiovascular mortality(22). Recent studies have challenged the HDL-C hypothesis by revealing  
21 292 that HDL-C level is not inversely correlated with cardiovascular diseases(23, 24). In our study, we  
22 293 used the baseline HDL-C level as a surrogate marker for HDL quantity, but we did not directly  
23 294 measure the quality of HDL. Measuring the level of HDL-C in serum is a commonly used method  
24 295 to assess the effect of HDL on cardiovascular health. HDL facilitates the transportation of  
25 296 cholesterol from the body's tissues back to the liver, and higher levels of HDL-C are generally  
26 297 associated with a lower risk of heart disease. Nevertheless, it's crucial to note that HDL-C levels  
27 298 may not accurately reflect the functional properties of HDL. ApoA1, the most abundant protein in  
28 299 HDL, is associated with several beneficial effects of HDL(15, 25). The function and abundance of  
29 300 ApoA1 are reported to play a dominant role in HDL quality(26). In the context of AIC, several  
30 301 studies have indicated that HDL can protect against anthracycline-induced cardiomyocyte  
31 302 apoptosis and atrophy in isolated cardiomyocytes(27, 28) and animal models(16, 28). Our recent  
32 303 case-control study, revealing that both HDL-C and ApoA1 serve as predictive factors in patients  
33 304 treated with 3 cycles of anthracycline-contained chemotherapy(18). Based on these earlier trials,  
34 305 HDL-C and ApoA1 could serve as protective factors against anthracycline-related cardiovascular  
35 306 disease. However, our study didn't focus on the investigation of the impact of ApoA1 on AISC.  
36 307 Even when ApoA1 was included in the Cox regression model, no significant association with  
37 308 AISC in patients with DLBCL treated with R-CHOP was observed ( $P>0.05$ , data not shown),  
38 309 probably due to the number of events in our study was insufficient to support a robust ApoA1  
39 310 analysis. Therefore, the role of ApoA1, the most abundant protein in HDL, in the context of AISC,  
40 311 warrants further investigation in future research.

41  
42  
43  
44  
45  
46  
47  
48  
49  
50  
51 312 As far as we know, few clinical studies have investigated the association between HDL-C and  
52 313 AISC. This study is the first clinical research that utilizes the IC-OS consensus statement(12) to  
53 314 define subclinical cardiotoxicity, with univariate and multivariable analyses being used to identify  
54 315 the influential factors of AISC in DLBCL patients in this cohort. Kaplan-Meier methods and Log-

1  
2  
3 316 rank tests reveal that patients with high HDL-C levels were less likely to develop AISC. After  
4 317 subjecting it to univariate and multivariable Cox regression methods, high HDL-C levels still  
5 318 showed statistically significant differences. These results suggest that high HDL-C could be a  
6 319 potentially independent protective factor for AISC in DLBCL patients and provide an opportunity  
7 320 for investigators to develop a tool for early intervention and prevention of AISC. Further research  
8 321 is necessary to confirm our findings.

9  
10 322 Several studies have demonstrated that serum lipid levels are altered during anthracycline-  
11 323 containing chemotherapy in cancer patients(29, 30). Huxley et al and Averina et al have shown  
12 324 that imbalanced serum lipid distribution is a risk factor for cardiovascular disease(31, 32). As a  
13 325 result, anthracycline-containing treatment can induce dyslipidemia and facilitate the occurrence  
14 326 and development of cardiovascular diseases in cancer patients. In a study of 394 breast cancer  
15 327 patients, Xin et al found that HDL-C levels after chemotherapy were significantly lower than those  
16 328 before chemotherapy(33). Similarly, Lu et al and Hana et al found that HDL-C levels were  
17 329 significantly decreased during anthracycline-containing chemotherapy in patients with breast  
18 330 cancer(34, 35). In our study, we specifically assessed the changes in HDL-C levels over time  
19 331 during follow-up. Except for the group of patients who experienced AISC at 12 months after  
20 332 treatment completion, HDL-C levels in all other groups increased from baseline to the 3rd cycle  
21 333 of chemotherapy. This phenomenon may be due to the fact that anti-tumor drugs require  
22 334 cholesterol to cross cell membranes(36). However, HDL-C levels were significantly decreased  
23 335 from the end of the 3rd cycle of chemotherapy to the end of the 6th cycle of chemotherapy in all  
24 336 patients, especially in the AISC group, which is consistent with previous research results(33-35),  
25 337 and further confirmed that anthracycline-contained chemotherapy has adverse effects on HDL-C  
26 338 levels in DLBCL patients. The HDL-C level in patients without AISC was more stable than that  
27 339 in patients with AISC. Therefore, anthracycline-containing chemotherapy may promote the  
28 340 occurrence and development of cardiotoxicity in DLBCL patients by inducing HDL-C turbulence.  
29 341 Besides, the findings of our study indicate a significant decrease in GLS during the chemotherapy  
30 342 period in patients with AISC. This result is consistent with previous research, which has reported  
31 343 that doxorubicin dose at the range of 100-150mg/m<sup>2</sup> can cause cardiotoxicity(37). Notably, we  
32 344 also observed that GLS remained stable after completion of chemotherapy, suggesting that the  
33 345 cardiac effects of anthracycline-based chemotherapy may be dose-related. These findings have  
34 346 important implications for the monitoring and management of cardiotoxicity in patients  
35 347 undergoing anthracycline-based chemotherapy, as early detection of cardiac dysfunction during  
36 348 treatment may improve patient outcomes. We investigated the associations of change in HDL-C  
37 349 with change in GLS, no statistically significant differences were found.

38  
39 350 The analysis of HDL-C levels should not only consider the changes over time, but also the absolute  
40 351 values. In our study, patients without AISC had significantly higher absolute highest HDL-C levels  
41 352 than those with AISC, while the absolute lowest HDL-C levels did not differ significantly between  
42 353 the two groups. The alterations from HDL-C extremes to baseline did not exhibit any variation  
43 354 between the groups either. This suggests that the highest absolute HDL-C value was a preferable  
44 355 indicator of AISC protection than the change in HDL-C from baseline to the extremum value.

356 Maintaining a relatively high level of HDL-C may be more effective in managing the cardio-  
357 protection of anthracycline-treated cancer patients than monitoring changes in HDL-C levels over  
358 time.

359 In our investigation, we observed that among the four patients with pre-existing hypertension, one  
360 patient experienced AISC during the follow-up (Table S3). Multivariable Cox regression analysis  
361 showed that hypertension did not have a significant impact on AISC ( $P>0.05$ ). Hypertension, a  
362 common risk factor for both cancer and cardiovascular diseases, was also recognized as a risk  
363 factor for cardiotoxicity. Studies have reported that pre-existing hypertension was associated with  
364 anthracycline-and trastuzumab induced left ventricular ejection fraction (LVEF) decline in a  
365 retrospective study(38), and early left ventricular systolic dysfunction in patients with lymphoma  
366 receiving (R)-CHOP in a prospective study(39). We noted that all patients with hypertension in  
367 our study were under a single antihypertensive drug regimen (beta-blockers or ACEI/ARB) to  
368 manage their blood pressure. Two meta-analyses have demonstrated that beta-blockers and ACEI  
369 can prevent cardiotoxicity caused by chemotherapy (40, 41). We speculate that the protective  
370 effects of beta-blockers and ACEI/ARB may have contributed to the result observed in our study  
371 regarding the relationship between hypertension and AISC.

372 There are several limitations to our study that must be acknowledged. Firstly, while our study  
373 highlights the potential importance of HDL-C in managing AISC, additional studies are necessary  
374 to fully evaluate the benefits and limitations of HDL-C as a cardio-protective strategy in  
375 anthracycline-treated cancer patients. Secondly, this is a single-center observational prospective  
376 study with a medium sample size. To confirm our findings, a larger sample size study conducted  
377 at multiple centers is needed. Thirdly, previous studies have suggested that there may be a reversed  
378 U-shaped relationship between HDL-C levels and cardiovascular diseases(42). Due to the small  
379 sample size of this study, we didn't further investigate the influence of extremely high levels of  
380 HDL-C on cardiotoxicity, and further clinical studies should be done to verify it. Besides, the  
381 measurement of GLS was only taken at baseline and at several points throughout the chemotherapy  
382 treatment and follow-up period. It is crucial to extend the duration of follow-up in future research  
383 to obtain a more comprehensive understanding of the long-term effects of anthracycline treatment  
384 on cardiovascular health.

385

## 386 CONCLUSIONS

387 In conclusion, our observational prospective study suggests that higher levels of HDL-C may be  
388 associated with a lower risk of AISC in patients with DLBCL treated with R-CHOP chemotherapy.  
389 HDL-C levels remained stable and consistently higher in patients without AISC compared to those  
390 with AISC. Additionally, the highest absolute HDL-C value was found to be a preferable indicator  
391 of AISC protection. These findings suggest that HDL-C may be a potential cardio-protective target  
392 for managing AISC in this patient population. However, further research is needed to confirm and  
393 expand on these findings, including determining the optimal HDL-C level for cardio-protection  
394 and the potential benefits of early serum lipid management.

395

## 396 **ACKNOWLEDGMENTS**

397 The authors would like to thank all the nurses, other medical workers and patients' families who  
398 assisted in this study.

399

## 400 **COMPETING INTERESTS**

401 The authors declare no conflict of interest.

402

## 403 **FUNDING**

404 This research was funded by the Science-Health Joint Medical Scientific Research Project of  
405 Chongqing “Study of antineoplastic drugs induced early cardiotoxicity in patients with Lymphoma  
406 ” (Grant No. 2021MSXM276), the Natural Science Foundation of Chongqing “The mechanism of  
407 doxorubicin promoting atherosclerosis in lymphoma patients through NF- $\kappa$ B/miR-33 signaling  
408 pathway” (Grant No. cstc2019jcyj-msxmX0043), the Science-Health Joint Medical Scientific  
409 Research Project of Chongqing “Evaluation of cardiac function in patients with anthracycline  
410 chemotherapy by a new strain imaging technique” (Gant No. 2019ZDXM033), and the Chongqing  
411 Postgraduate Scientific Research and Innovation Project “Study on the role of high-density  
412 lipoprotein in anthracycline-induced subclinical cardiotoxicity in patients with lymphoma” (Grant  
413 No. CYS22340).

414

## 415 **AUTHOR CONTRIBUTIONS**

416 Conceptualization, Wenxin Ou, Tiantian Jiang, Nan Zhang, Kai Lu, Yue Weng, Xi Zhou, Dong  
417 Wang, Qian Dong and Xiaoqiong Tang; Data curation, Wenxin Ou, Tiantian Jiang, Yue Weng and  
418 Xi Zhou; Formal analysis, Wenxin Ou and Tiantian Jiang; Funding acquisition, Wenxin Ou, Nan  
419 Zhang, Dong Wang and Xiaoqiong Tang; Investigation, Dong Wang, Qian Dong and Xiaoqiong  
420 Tang; Methodology, Wenxin Ou, Tiantian Jiang, Nan Zhang, Kai Lu, Yue Weng, Xi Zhou, Dong  
421 Wang, Qian Dong and Xiaoqiong Tang; Resources, Dong Wang, Qian Dong and Xiaoqiong Tang;  
422 Supervision, Qian Dong and Xiaoqiong Tang; Validation, Nan Zhang and Kai Lu; Visualization,  
423 Wenxin Ou and Tiantian Jiang; Writing – original draft, Wenxin Ou; Writing – review & editing,  
424 Wenxin Ou, Tiantian Jiang, Nan Zhang, Kai Lu, Yue Weng, Xi Zhou, Dong Wang, Qian Dong  
425 and Xiaoqiong Tang. Qian Dong and Xiaoqiong Tang contributed equally to this work and are  
426 considered as co-corresponding authors.

427

## 428 **DATA AVAILABILITY STATEMENT**

429 Data are available upon reasonable request.

430

## 431 **ETHICS APPROVAL**

432 The study was conducted in accordance with the Declaration of Helsinki and approved by the  
433 ethics committee of the First Affiliated Hospital of Chongqing Medical University (Approval NO.  
434 2018-016). And all participating patients provided written informed consent.

435

436 **REFERENCE**

- 437 1. Rosen MR, Myerburg RJ, Francis DP, Cole GD, Marbán E. Translating stem cell  
438 research to cardiac disease therapies: pitfalls and prospects for improvement. *J Am Coll*  
439 *Cardiol.* 2014;64(9):922-37.
- 440 2. Minotti G, Menna P, Salvatorelli E, Cairo G, Gianni L. Anthracyclines: molecular  
441 advances and pharmacologic developments in antitumor activity and cardiotoxicity. *Pharmacol*  
442 *Rev.* 2004;56(2):185-229.
- 443 3. Hasin T, Gerber Y, McNallan SM, Weston SA, Kushwaha SS, Nelson TJ, et al. Patients  
444 with heart failure have an increased risk of incident cancer. *J Am Coll Cardiol.* 2013;62(10):881-  
445 6.
- 446 4. Abdel-Qadir H, Austin PC, Lee DS, Amir E, Tu JV, Thavendiranathan P, et al. A  
447 Population-Based Study of Cardiovascular Mortality Following Early-Stage Breast Cancer.  
448 *JAMA Cardiol.* 2017;2(1):88-93.
- 449 5. Stoltzfus KC, Zhang Y, Sturgeon K, Sinoway LI, Trifiletti DM, Chinchilli VM, et al. Fatal  
450 heart disease among cancer patients. *Nat Commun.* 2020;11(1):2011.
- 451 6. Thandra KC, Barsouk A, Saginala K, Padala SA, Barsouk A, Rawla P. Epidemiology of  
452 Non-Hodgkin's Lymphoma. *Med Sci (Basel).* 2021;9(1).
- 453 7. Teras LR, DeSantis CE, Cerhan JR, Morton LM, Jemal A, Flowers CR. 2016 US  
454 lymphoid malignancy statistics by World Health Organization subtypes. *CA Cancer J Clin.*  
455 2016;66(6):443-59.
- 456 8. Salles G, Barrett M, Foà R, Maurer J, O'Brien S, Valente N, et al. Rituximab in B-Cell  
457 Hematologic Malignancies: A Review of 20 Years of Clinical Experience. *Adv Ther.*  
458 2017;34(10):2232-73.
- 459 9. McGowan JV, Chung R, Maulik A, Piotrowska I, Walker JM, Yellon DM. Anthracycline  
460 Chemotherapy and Cardiotoxicity. *Cardiovasc Drugs Ther.* 2017;31(1):63-75.
- 461 10. Russell RR, Alexander J, Jain D, Poornima IG, Srivastava AV, Storozynsky E, et al. The  
462 role and clinical effectiveness of multimodality imaging in the management of cardiac  
463 complications of cancer and cancer therapy. *J Nucl Cardiol.* 2016;23(4):856-84.
- 464 11. Curigliano G, Lenihan D, Fradley M, Ganatra S, Barac A, Blaes A, et al. Management of  
465 cardiac disease in cancer patients throughout oncological treatment: ESMO consensus  
466 recommendations. *Ann Oncol.* 2020;31(2):171-90.
- 467 12. Herrmann J, Lenihan D, Armenian S, Barac A, Blaes A, Cardinale D, et al. Defining  
468 cardiovascular toxicities of cancer therapies: an International Cardio-Oncology Society (IC-OS)  
469 consensus statement. *Eur Heart J.* 2022;43(4):280-99.
- 470 13. Fallah-Rad N, Walker JR, Wassef A, Lytwyn M, Bohonis S, Fang T, et al. The utility of  
471 cardiac biomarkers, tissue velocity and strain imaging, and cardiac magnetic resonance imaging  
472 in predicting early left ventricular dysfunction in patients with human epidermal growth factor  
473 receptor II-positive breast cancer treated with adjuvant trastuzumab therapy. *J Am Coll Cardiol.*  
474 2011;57(22):2263-70.
- 475 14. Negishi K, Negishi T, Haluska BA, Hare JL, Plana JC, Marwick TH. Use of speckle strain  
476 to assess left ventricular responses to cardiotoxic chemotherapy and cardioprotection. *Eur*  
477 *Heart J Cardiovasc Imaging.* 2014;15(3):324-31.
- 478 15. Kluck GEG, Durham KK, Yoo JA, Trigatti BL. High Density Lipoprotein and Its Precursor  
479 Protein Apolipoprotein A1 as Potential Therapeutics to Prevent Anthracycline Associated  
480 Cardiotoxicity. *Front Cardiovasc Med.* 2020;7:65.
- 481 16. Durham KK, Chathely KM, Mak KC, Momen A, Thomas CT, Zhao YY, et al. HDL  
482 protects against doxorubicin-induced cardiotoxicity in a scavenger receptor class B type 1-,  
483 PI3K-, and Akt-dependent manner. *Am J Physiol Heart Circ Physiol.* 2018;314(1):H31-h44.
- 484 17. Van Linthout S, Frias M, Singh N, De Geest B. Therapeutic potential of HDL in  
485 cardioprotection and tissue repair. *Handb Exp Pharmacol.* 2015;224:527-65.

- 1  
2  
3 486 18. Dong Q, Ou W, Wang M, Jiang T, Weng Y, Zhou X, et al. Study on influencing factors of  
4 487 anthracycline-induced subclinical cardiotoxicity in DLBCL patients administered (R)-CHOP.  
5 488 BMC Cancer. 2022;22(1):988.
- 6 489 19. Executive Summary of The Third Report of The National Cholesterol Education Program  
7 490 (NCEP) Expert Panel on Detection, Evaluation, And Treatment of High Blood Cholesterol In  
8 491 Adults (Adult Treatment Panel III). *Jama*. 2001;285(19):2486-97.
- 9 492 20. MA K, J S. Sample Size Calculators [website]: UCSF CTSI; 20 December 2021  
10 493 [Available from: <https://www.sample-size.net/>].
- 11 494 21. Mahley RW, Innerarity TL, Rall SC, Jr., Weisgraber KH. Plasma lipoproteins:  
12 495 apolipoprotein structure and function. *J Lipid Res*. 1984;25(12):1277-94.
- 13 496 22. Wilson PW, Abbott RD, Castelli WP. High density lipoprotein cholesterol and mortality.  
14 497 The Framingham Heart Study. *Arteriosclerosis*. 1988;8(6):737-41.
- 15 498 23. Schwartz GG, Olsson AG, Abt M, Ballantyne CM, Barter PJ, Brumm J, et al. Effects of  
16 499 dalcetrapib in patients with a recent acute coronary syndrome. *N Engl J Med*.  
17 500 2012;367(22):2089-99.
- 18 501 24. Lincoff AM, Nicholls SJ, Riesmeyer JS, Barter PJ, Brewer HB, Fox KAA, et al.  
19 502 Evacetrapib and Cardiovascular Outcomes in High-Risk Vascular Disease. *N Engl J Med*.  
20 503 2017;376(20):1933-42.
- 21 504 25. Rader DJ. Molecular regulation of HDL metabolism and function: implications for novel  
22 505 therapies. *J Clin Invest*. 2006;116(12):3090-100.
- 23 506 26. Smith JD. Dysfunctional HDL as a diagnostic and therapeutic target. *Arterioscler Thromb*  
24 507 *Vasc Biol*. 2010;30(2):151-5.
- 25 508 27. Brinck JW, Thomas A, Brulhart-Meynet MC, Lauer E, Frej C, Dahlbäck B, et al. High-  
26 509 density lipoprotein from end-stage renal disease patients exhibits superior cardioprotection and  
27 510 increase in sphingosine-1-phosphate. *Eur J Clin Invest*. 2018;48(2).
- 28 511 28. Durham KK, Kluck G, Mak KC, Deng YD, Trigatti BL. Treatment with apolipoprotein A1  
29 512 protects mice against doxorubicin-induced cardiotoxicity in a scavenger receptor class B, type I-  
30 513 dependent manner. *Am J Physiol Heart Circ Physiol*. 2019;316(6):H1447-h57.
- 31 514 29. Bicakli DH, Varol U, Degirmenci M, Tunali D, Cakar B, Durusoy R, et al. Adjuvant  
32 515 chemotherapy may contribute to an increased risk for metabolic syndrome in patients with  
33 516 breast cancer. *J Oncol Pharm Pract*. 2016;22(1):46-53.
- 34 517 30. Rzymowska J. Effect of cytotoxic chemotherapy on serum lipid levels in breast cancer  
35 518 patients. *Pathobiology*. 1999;67(3):129-32.
- 36 519 31. Huxley R, Lewington S, Clarke R. Cholesterol, coronary heart disease and stroke: a  
37 520 review of published evidence from observational studies and randomized controlled trials.  
38 521 *Semin Vasc Med*. 2002;2(3):315-23.
- 39 522 32. Averina M, Nilssen O, Brenn T, Brox J, Arkhipovsky VL, Kalinin AG. Factors behind the  
40 523 increase in cardiovascular mortality in Russia: apolipoprotein AI and B distribution in the  
41 524 Arkhangelsk study 2000. *Clin Chem*. 2004;50(2):346-54.
- 42 525 33. Li X, Liu ZL, Wu YT, Wu H, Dai W, Arshad B, et al. Status of lipid and lipoprotein in  
43 526 female breast cancer patients at initial diagnosis and during chemotherapy. *Lipids Health Dis*.  
44 527 2018;17(1):91.
- 45 528 34. Kalábová H, Melichar B, Ungermann L, Doležal J, Krčmová L, Kašparová M, et al.  
46 529 Intima-media thickness, myocardial perfusion and laboratory risk factors of atherosclerosis in  
47 530 patients with breast cancer treated with anthracycline-based chemotherapy. *Med Oncol*.  
48 531 2011;28(4):1281-7.
- 49 532 35. Lu Q, Wu X, Zhu Y, Yang J, Wang X, Ye C, et al. Effects of Chemotherapy on Serum  
50 533 Lipids in Chinese Postoperative Breast Cancer Patients. *Cancer Manag Res*. 2020;12:8397-  
51 534 408.

- 1  
2  
3 535 36. Zhang L, Bennett WF, Zheng T, Ouyang PK, Ouyang X, Qiu X, et al. Effect of  
4 536 Cholesterol on Cellular Uptake of Cancer Drugs Pirarubicin and Ellipticine. *J Phys Chem B*.  
5 537 2016;120(12):3148-56.  
6 538 37. Blanco JG, Sun CL, Landier W, Chen L, Esparza-Duran D, Leisenring W, et al.  
7 539 Anthracycline-related cardiomyopathy after childhood cancer: role of polymorphisms in carbonyl  
8 540 reductase genes--a report from the Children's Oncology Group. *J Clin Oncol*. 2012;30(13):1415-  
9 541 21.  
10 542 38. Hamirani Y, Fanous I, Kramer CM, Wong A, Salerno M, Dillon P. Anthracycline- and  
11 543 trastuzumab-induced cardiotoxicity: a retrospective study. *Med Oncol*. 2016;33(7):82.  
12 544 39. Szmit S, Jurczak W, Zaucha JM, Drozd-Sokołowska J, Spychałowicz W, Joks M, et al.  
13 545 Pre-existing arterial hypertension as a risk factor for early left ventricular systolic dysfunction  
14 546 following (R)-CHOP chemotherapy in patients with lymphoma. *J Am Soc Hypertens*.  
15 547 2014;8(11):791-9.  
16 548 40. Shah P, Garris R, Abboud R, Vasudev R, Patel H, Doshi R, et al. Meta-Analysis  
17 549 Comparing Usefulness of Beta Blockers to Preserve Left Ventricular Function During  
18 550 Anthracycline Therapy. *Am J Cardiol*. 2019;124(5):789-94.  
19 551 41. Dong H, Yao L, Wang M, Wang M, Li X, Sun X, et al. Can ACEI/ARB prevent the  
20 552 cardiotoxicity caused by chemotherapy in early-stage breast cancer?-a meta-analysis of  
21 553 randomized controlled trials. *Transl Cancer Res*. 2020;9(11):7034-43.  
22 554 42. Feng M, Darabi M, Tubeuf E, Canicio A, Lhomme M, Frisdal E, et al. Free cholesterol  
23 555 transfer to high-density lipoprotein (HDL) upon triglyceride lipolysis underlies the U-shape  
24 556 relationship between HDL-cholesterol and cardiovascular disease. *Eur J Prev Cardiol*.  
25 557 2020;27(15):1606-16.  
26 558  
27 559  
28  
29

## 30 560 **FIGURE LEGENS**

31 561 **Figure 1. (a)** Timeline of high-density lipoprotein cholesterol (HDL-C) levels in patients  
32 562 detected anthracycline-induced subclinical cardiotoxicity (AISC) at four time points. 12 patients  
33 563 were detected AISC at the end of the 3rd cycle of chemotherapy. 7 patients were detected AISC  
34 564 at the end of the 6th cycle of chemotherapy. 3 patients were detected AISC at 6 months after  
35 565 treatment completion. 2 patients were detected AISC at 12 months after treatment completion.  
36 566 **(b)** Timeline of HDL-C levels of patients without AISC.

37 567 **Figure 2.** Timeline of high-density lipoprotein cholesterol (HDL-C) levels **(a)** and global  
38 568 longitudinal strain (GLS) **(b)** in patients with and without anthracycline-induced subclinical  
39 569 cardiotoxicity (AISC) during the whole follow-up period.

40 570 **Figure 3. (a)** Changes of high-density lipoprotein cholesterol (HDL-C) in all patients from  
41 571 baseline to the end of the 6th cycle of chemotherapy. **(b)** Changes of HDL-C in patients with  
42 572 anthracycline-induced subclinical cardiotoxicity (AISC). **(c)** Changes of HDL-C in patients  
43 573 without AISC.

44 574 **Figure 4.** High-density lipoprotein cholesterol (HDL-C) differences between anthracycline-  
45 575 induced subclinical cardiotoxicity (AISC) and No-AISC. **(a)** Highest level of HDL-C during  
46 576 chemotherapy. **(b)**The HDL-C value increment from baseline to the highest value. **(c)** The lowest  
47 577 level of HDL-C during chemotherapy. **(d)** The HDL-C value declined from baseline to the  
48 578 lowest.

1  
2  
3 579 **Figure S1.** Flow diagram of patients enrolled in our observational research and reasons for lost  
4 580 to follow-up.

5  
6 581 **Figure S2.** Kaplan-Meier curves of the percentage of patients without AISC in patients stratified  
7 582 by HDL-C level. High HDL-C: HDL-C  $\geq$  1.16mmol/L. Low HDL-C: HDL-C < 1.16mmol/L.  
8  
9 583 AISC, anthracycline-induced cardiotoxicity; HDL-C, high-density lipoprotein cholesterol; HR,  
10 584 hazard ratio.

11 585  
12  
13 586

14  
15  
16  
17  
18  
19  
20  
21  
22  
23  
24  
25  
26  
27  
28  
29  
30  
31  
32  
33  
34  
35  
36  
37  
38  
39  
40  
41  
42  
43  
44  
45  
46  
47  
48  
49  
50  
51  
52  
53  
54  
55  
56  
57  
58  
59  
60

For peer review only



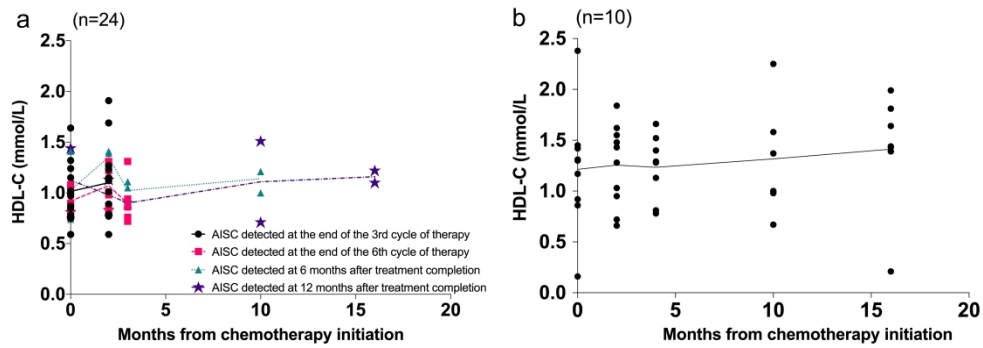

Figure 1. (a) Timeline of high-density lipoprotein cholesterol (HDL-C) levels in patients detected anthracycline-induced subclinical cardiotoxicity (AISC) at four time points. 12 patients were detected AISC at the end of the 3rd cycle of chemotherapy. 7 patients were detected AISC at the end of the 6th cycle of chemotherapy. 3 patients were detected AISC at 6 months after treatment completion. 2 patients were detected AISC at 12 months after treatment completion. (b) Timeline of HDL-C levels of patients without AISC.

420x144mm (300 x 300 DPI)



Figure 2. Timeline of high-density lipoprotein cholesterol (HDL-C) levels (a) and global longitudinal strain (GLS) (b) in patients with and without anthracycline-induced subclinical cardiotoxicity (AISC) during the whole follow-up period.

325x117mm (300 x 300 DPI)



Figure 3. (a) Changes of high-density lipoprotein cholesterol (HDL-C) in all patients from baseline to the end of the 6th cycle of chemotherapy. (b) Changes of HDL-C in patients with anthracycline-induced subclinical cardiotoxicity (AISC). (c) Changes of HDL-C in patients without AISC.

365x166mm (300 x 300 DPI)



Figure 4. High-density lipoprotein cholesterol (HDL-C) differences between anthracycline-induced subclinical cardiotoxicity (AISC) and No-AISC. (a) Highest level of HDL-C during chemotherapy. (b) The HDL-C value increment from baseline to the highest value. (c) The lowest level of HDL-C during chemotherapy. (d) The HDL-C value declined from baseline to the lowest.

206x267mm (300 x 300 DPI)

1  
2  
3  
4  
5  
6  
7  
8  
9  
10  
11  
12  
13  
14  
15  
16  
17  
18  
19  
20  
21  
22  
23  
24  
25  
26  
27  
28  
29  
30  
31  
32  
33  
34  
35  
36  
37  
38  
39  
40  
41  
42  
43  
44  
45  
46  
47  
48  
49  
50  
51  
52  
53  
54  
55  
56  
57  
58  
59  
60

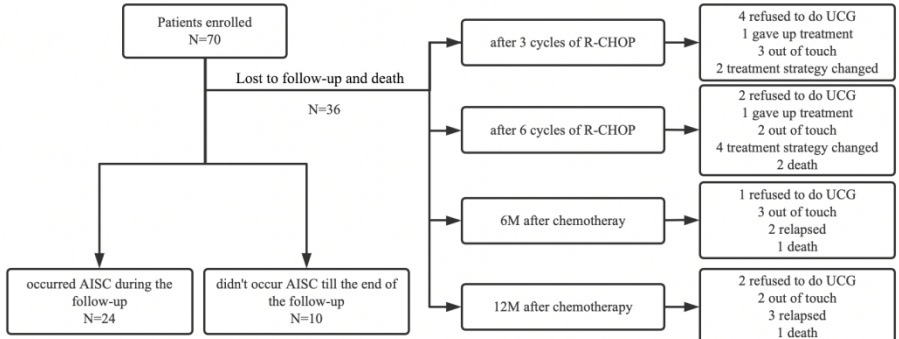

325x126mm (144 x 144 DPI)

1  
2  
3  
4  
5  
6  
7  
8  
9  
10  
11  
12  
13  
14  
15  
16  
17  
18  
19  
20  
21  
22  
23  
24  
25  
26  
27  
28  
29  
30  
31  
32  
33  
34  
35  
36  
37  
38  
39  
40  
41  
42  
43  
44  
45  
46  
47  
48  
49  
50  
51  
52  
53  
54  
55  
56  
57  
58  
59  
60

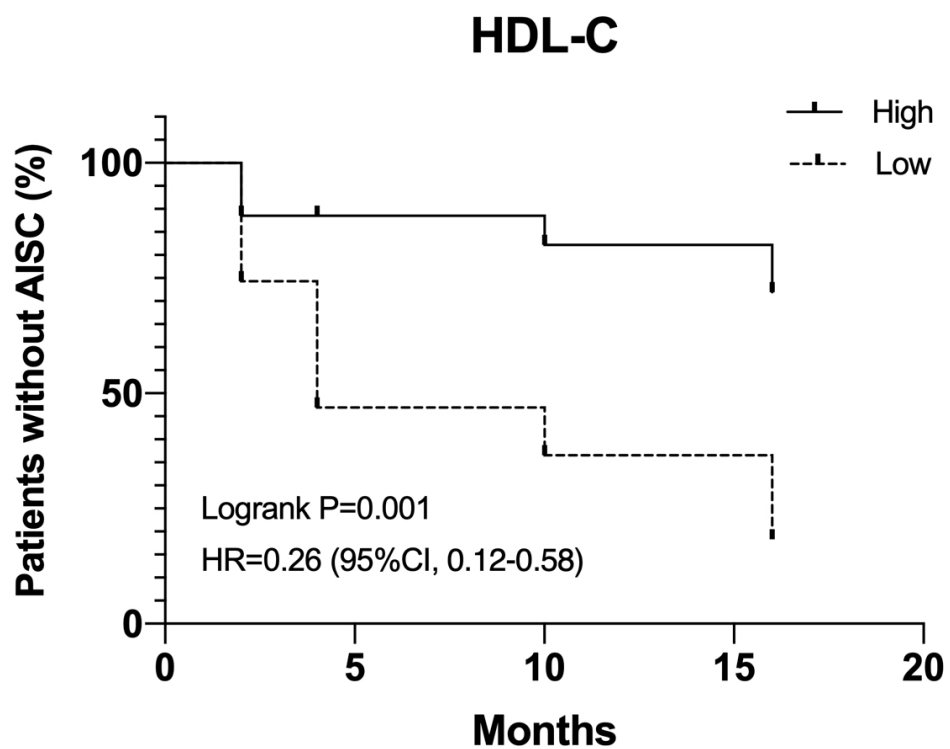

100x78mm (300 x 300 DPI)

Table S1. Baseline clinical characteristics of patients enrolled

|                            | Total cohort<br>n=70  | Low HDL-C*<br>n=42    | High HDL-C*<br>n=28   | P-value          |
|----------------------------|-----------------------|-----------------------|-----------------------|------------------|
| Age (year)                 | 55.03±14.79           | 52.48±16.11           | 58.86±11.83           | 0.077            |
| Male/Female (n)            | 34/36                 | 22/20                 | 12/16                 | 0.435            |
| BMI (kg/m <sup>2</sup> )   | 23.08±3.33            | 23.51±3.29            | 22.43±3.33            | 0.183            |
| ECoG performance status    |                       |                       |                       | 0.465            |
| 0 (%)                      | 37 (52.86)            | 22 (52.38)            | 15 (53.57)            |                  |
| 1 (%)                      | 24 (34.29%)           | 13 (30.95)            | 11 (39.28)            |                  |
| 2 (%)                      | 9 (12.85)             | 7 (16.67)             | 2 (7.14)              |                  |
| Hypertension (%)           | 9 (12.86)             | 5 (11.90)             | 4 (14.28)             | 1.000            |
| Antihypertensive treatment | 9 (12.86)             | 5 (11.90)             | 4 (14.28)             | 1.000            |
| ACEI/ARB                   | 5                     | 2                     | 3                     |                  |
| Beta-blockers              | 4                     | 3                     | 1                     |                  |
| Diabetes mellitus (%)      | 5 (7.14)              | 3 (7.14)              | 2 (7.14)              | 1.000            |
| Smoking (%)                | 21 (30.00)            | 10 (23.81)            | 11 (39.28)            | 0.166            |
| Drinking (%)               | 18 (25.71)            | 7 (16.67)             | 11 (39.28)            | <b>0.034</b>     |
| Heart rate                 | 80.67±10.61           | 81.50±11.04           | 79.43±10.02           | 0.428            |
| LVEF (%)                   | 65.5 (63.0, 67.0)     | 65.0 (63.0, 67.0)     | 66.0 (63.2, 67.8)     | 0.522            |
| FS (%)                     | 35.67±2.10            | 35.60±2.14            | 35.79±2.08            | 0.713            |
| GLS (-%)                   | 20.0 (19.0, 22.0)     | 21.0 (19.0, 22.0)     | 20.0 (18.2, 21.0)     | 0.167            |
| LVDd (mm)                  | 46.30±3.50            | 46.93±3.44            | 45.36±3.43            | 0.065            |
| LVMi (g/m <sup>2</sup> )   | 94.72±17.55           | 96.79±18.54           | 91.62±15.76           | 0.230            |
| E (cm/s)                   | 69.12±13.12           | 69.71±12.79           | 68.23±13.80           | 0.647            |
| e' (cm/s)                  | 7.60±2.15             | 7.60±2.07             | 7.59±2.30             | 0.987            |
| E/e'                       | 9.61±2.41             | 9.66±2.30             | 9.53±2.59             | 0.832            |
| NT-proBNP (ng/L)           | 62.50 (31.25, 132.25) | 51.00 (29.00, 128.75) | 79.00 (41.75, 168.50) | 0.171            |
| cTnT (ng/mL)               | 0.004 (0.000, 0.006)  | 0.004 (0.002, 0.007)  | 0.004 (0.000, 0.005)  | 0.509            |
| HsCRP                      | 2.61 (1.00, 15.64)    | 4.04 (1.17, 20.00)    | 1.95 (0.76, 14.51)    | 0.161            |
| TC (mmol/L)                | 4.09±0.93             | 3.86±0.97             | 4.44±0.76             | <b>0.011</b>     |
| TG (mmol/L)                | 1.40 (0.97, 1.68)     | 1.51 (1.19, 1.93)     | 1.10 (0.82, 1.50)     | <b>0.002</b>     |
| LDL (mmol/L)               | 2.55±0.77             | 2.42±0.80             | 2.75±0.69             | 0.084            |
| HDL-C (mmol/L)             | 1.08±0.38             | 0.84±0.21             | 1.44±0.28             | <b>&lt;0.001</b> |

Values are expressed as mean±standard deviation, n (%), or median (Q1-Q3). Bold values indicate statistical significance.

\* Low HDL-C: HDL-C<1.16mmol/L; High HDL-C: HDL-C≥1.16mmol/L. BMI: body mass index; cTnT: cardiac troponin T; ECoG: Eastern Cooperative Oncology Group; FS: fractional shortening; GLS: global longitudinal peak systolic strain; HDL-C: high-density lipoprotein cholesterol; HsCRP: high sensitivity C-reactive protein; LVEF: left ventricular ejection fraction; LVDd: left ventricular diastolic dimension; LVMi: left ventricular mass index; LDL-C: low-density lipoprotein cholesterol; NT-proBNP: N terminal-pro brain natriuretic peptide; TC: total cholesterol; TG: total triglyceride.

Table S2. Univariable Cox regression analysis of enrolled patients.

| Variables                    | Univariate analysis |             | P values         |
|------------------------------|---------------------|-------------|------------------|
|                              | HR                  | 95%CI       |                  |
| Age, per 1 year              | 0.97                | 0.943-0.998 | <b>0.034</b>     |
| Female vs Male               | 1.41                | 0.63-3.19   | 0.404            |
| BMI, per 1 kg/m <sup>2</sup> | 1.09                | 0.97-1.22   | 0.139            |
| ECoG, 0 or 1 vs status 2     | 0.63                | 0.30-1.32   | 0.220            |
| Hypertension, yes vs no      | 0.22                | 0.03-1.62   | 0.136            |
| Diabetes mellitus, yes vs no | 0.35                | 0.05-2.61   | 0.307            |
| Smoking, yes vs no           | 0.77                | 0.31-1.96   | 0.589            |
| Drinking, yes vs no          | 0.84                | 0.31-2.26   | 0.728            |
| Heart rate, per 1 bp         | 0.99                | 0.96-1.03   | 0.645            |
| LVEF, per 1%                 | 1.09                | 0.94-1.25   | 0.250            |
| FS, per 1%                   | 1.13                | 0.93-1.37   | 0.219            |
| GLS, per -1%                 | 1.46                | 1.20-1.77   | <b>&lt;0.001</b> |
| LVDd, per 1 mm               | 1.05                | 0.93-1.19   | 0.425            |
| LVMi, per 1 g/m <sup>2</sup> | 1.00                | 0.97-1.02   | 0.762            |
| E, per 1 cm/s                | 1.03                | 1.00-1.06   | 0.075            |
| e', per 1 cm/s               | 1.14                | 0.94-1.40   | 0.189            |
| E/e', per 1                  | 0.97                | 0.81-1.16   | 0.752            |
| NT-proBNP, per 1 ng/L        | 1.00                | 0.99-1.00   | 0.153            |
| cTnT, per lg1 ng/mL          | 1.19                | 0.83-1.72   | 0.340            |
| HsCRP, per 1                 | 1.02                | 0.97-1.07   | 0.453            |
| TC, per 1 mmol/L             | 0.78                | 0.51-1.20   | 0.259            |
| TG, per 1 mmol/L             | 0.93                | 0.55-1.58   | 0.796            |
| LDL-C, per 1 mmol/L          | 0.94                | 0.56-1.55   | 0.795            |
| HDL-C group (high vs low)    | 0.24                | 0.09-0.67   | <b>0.006</b>     |

High HDL-C group: HDL-C $\geq$ 1.16mmol/L. Low HDL-C group: HDL-C<1.16mmol/L. BMI: body mass index; cTnT: cardiac troponin T; ECoG: Eastern Cooperative Oncology Group; FS: fractional shortening; GLS: global longitudinal peak systolic strain; HDL-C: high-density lipoprotein cholesterol; HsCRP: high sensitivity C-reactive protein; LVEF: left ventricular ejection fraction; LVDd: left ventricular diastolic dimension; LVMi: left ventricular mass index; LDL-C: low-density lipoprotein cholesterol; NT-proBNP: N terminal-pro brain natriuretic peptide; TC: total cholesterol; TG: total triglyceride.



Table S3. Baseline clinical characteristics of un-censored patients with or without AISC.

|                            | Total cohort          | NO-AISC               | AISC                  | P-value          |
|----------------------------|-----------------------|-----------------------|-----------------------|------------------|
|                            | n=34                  | n=10                  | n=24                  |                  |
| Age (year)                 | 52.85±12.37           | 59.7±9.67             | 50.0±12.45            | <b>0.035</b>     |
| Male/Female (n)            | 19/15                 | 5/5                   | 14/10                 | 0.947            |
| BMI (kg/m <sup>2</sup> )   | 24.01±3.21            | 23.67±3.83            | 24.15±3.00            | 0.698            |
| ECOG performance status    |                       |                       |                       | 1.000            |
| 0 (%)                      | 23 (67.65)            | 7 (70.00)             | 16 (66.67)            |                  |
| 1 (%)                      | 7 (20.59)             | 2 (20.00)             | 5 (20.83)             |                  |
| 2 (%)                      | 4 (11.76)             | 1 (10.00)             | 3 (12.50)             |                  |
| Hypertension (%)           | 4 (11.76)             | 3 (30.00)             | 1 (4.17)              | 0.122            |
| Antihypertensive treatment | 4 (11.76)             | 3 (30.00)             | 1 (4.17)              | 0.122            |
| ACEI/ARB                   | 3                     | 2                     | 1                     |                  |
| Beta-blockers              | 1                     | 1                     | 0                     |                  |
| Diabetes mellitus (%)      | 3 (8.82)              | 2 (20.00)             | 1 (4.17)              | 0.412            |
| Smoking (%)                | 11 (32.35)            | 5 (50.00)             | 6 (25.00)             | 0.309            |
| Drinking (%)               | 7 (20.59)             | 2 (20.00)             | 5 (20.83)             | 1.000            |
| Heart rate                 | 81.03±11.08           | 84.60±13.53           | 79.54±9.83            | 0.231            |
| LVEF (%)                   | 65.0 (63.0, 67.0)     | 64.0 (62.0, 67.3)     | 66.0 (64.0, 67.0)     | 0.270            |
| FS (%)                     | 35.74±2.12            | 35.10±2.28            | 36.0±2.04             | 0.266            |
| GLS (-%)                   | 21.0 (19.0, 22.0)     | 18.0 (17.0, 20.0)     | 22.0 (21.0, 22.8)     | <b>&lt;0.001</b> |
| LVDd (mm)                  | 46.62±3.08            | 45.61±3.41            | 47.04±2.90            | 0.218            |
| LVMi (g/m <sup>2</sup> )   | 94.04±16.26           | 93.27±18.87           | 94.36±15.78           | 0.862            |
| E (cm/s)                   | 70.87±12.84           | 66.43±11.78           | 72.73±13.04           | 0.197            |
| e' (cm/s)                  | 7.59±1.77             | 6.90±1.88             | 7.88±1.68             | 0.144            |
| E/e'                       | 9.66±2.17             | 9.95±1.79             | 9.54±2.34             | 0.626            |
| NT-proBNP (ng/L)           | 46.00 (28.50, 109.00) | 78.50 (31.50, 133.25) | 41.00 (28.00, 122.00) | 0.308            |
| cTnT (ng/mL)               | 0.004 (0.000, 0.007)  | 0.004 (0.000, 0.008)  | 0.004 (0.000, 0.007)  | 0.816            |
| HsCRP                      | 2.28 (0.95, 17.18)    | 1.62 (0.54, 13.79)    | 3.84 (1.21, 20.00)    | 0.216            |
| TC (mmol/L)                | 4.07±0.95             | 4.38±1.31             | 3.95±0.75             | 0.219            |
| TG (mmol/L)                | 1.40 (1.12, 1.63)     | 1.54 (1.67, 1.85)     | 1.38 (1.10, 1.56)     | 0.344            |
| LDL-C (mmol/L)             | 2.59±0.83             | 2.73±1.15             | 2.53±0.68             | 0.530            |
| HDL-C (mmol/L)             | 1.06±0.38             | 1.21±0.56             | 1.00±0.26             | 0.128            |
| HDL-C group*               |                       |                       |                       | <b>0.019</b>     |
| High (%)                   | 12 (35.29)            | 7 (70.00)             | 5 (20.83)             |                  |
| Low (%)                    | 22 (64.71)            | 3 (30.00)             | 19 (79.17)            |                  |

\*High HDL-C: HDL-C $\geq$ 1.16mmol/L. Low HDL-C: HDL-C $<$ 1.16mmol/L.

AISC: anthracycline-induced subclinical cardiotoxicity; AST: aspartate transaminase; ALT: alanine aminotransferase; BMI: body mass index; cTnT: cardiac troponin T; ECOG: Eastern Cooperative Oncology Group; FS: fractional shortening; GLS: global longitudinal peak systolic strain; HDL-C: high-density lipoprotein cholesterol; HsCRP: high sensitivity C-reactive protein; LVEF: left ventricular ejection fraction; LVDd: left ventricular diastolic dimension; LVMi: left ventricular mass index; LDL-C: low-density lipoprotein cholesterol; NT-proBNP: N terminal-pro brain natriuretic peptide; TC: total

1  
2  
3 cholesterol; TG: total triglyceride.  
4  
5  
6  
7  
8  
9  
10  
11  
12  
13  
14  
15  
16  
17  
18  
19  
20  
21  
22  
23  
24  
25  
26  
27  
28  
29  
30  
31  
32  
33  
34  
35  
36  
37  
38  
39  
40  
41  
42  
43  
44  
45  
46  
47  
48  
49  
50  
51  
52  
53  
54  
55  
56  
57  
58  
59  
60

For peer review only

STROBE Statement—Checklist of items that should be included in reports of *cohort studies*

|                              | Item No | Recommendation                                                                                                                                                                                                                                                                                                         | Page No |
|------------------------------|---------|------------------------------------------------------------------------------------------------------------------------------------------------------------------------------------------------------------------------------------------------------------------------------------------------------------------------|---------|
| <b>Title and abstract</b>    | 1       | (a) Indicate the study's design with a commonly used term in the title or the abstract<br>(b) Provide in the abstract an informative and balanced summary of what was done and what was found                                                                                                                          | 1       |
| <b>Introduction</b>          |         |                                                                                                                                                                                                                                                                                                                        |         |
| Background/rationale         | 2       | Explain the scientific background and rationale for the investigation being reported                                                                                                                                                                                                                                   | 2       |
| Objectives                   | 3       | State specific objectives, including any prespecified hypotheses                                                                                                                                                                                                                                                       | 3       |
| <b>Methods</b>               |         |                                                                                                                                                                                                                                                                                                                        |         |
| Study design                 | 4       | Present key elements of study design early in the paper                                                                                                                                                                                                                                                                | 3       |
| Setting                      | 5       | Describe the setting, locations, and relevant dates, including periods of recruitment, exposure, follow-up, and data collection                                                                                                                                                                                        | 4       |
| Participants                 | 6       | (a) Give the eligibility criteria, and the sources and methods of selection of participants. Describe methods of follow-up<br>(b) For matched studies, give matching criteria and number of exposed and unexposed                                                                                                      | 3-4     |
| Variables                    | 7       | Clearly define all outcomes, exposures, predictors, potential confounders, and effect modifiers. Give diagnostic criteria, if applicable                                                                                                                                                                               | 4       |
| Data sources/<br>measurement | 8*      | For each variable of interest, give sources of data and details of methods of assessment (measurement). Describe comparability of assessment methods if there is more than one group                                                                                                                                   | 4       |
| Bias                         | 9       | Describe any efforts to address potential sources of bias                                                                                                                                                                                                                                                              | NA      |
| Study size                   | 10      | Explain how the study size was arrived at                                                                                                                                                                                                                                                                              | 3       |
| Quantitative variables       | 11      | Explain how quantitative variables were handled in the analyses. If applicable, describe which groupings were chosen and why                                                                                                                                                                                           | 3       |
| Statistical methods          | 12      | (a) Describe all statistical methods, including those used to control for confounding<br>(b) Describe any methods used to examine subgroups and interactions<br>(c) Explain how missing data were addressed<br>(d) If applicable, explain how loss to follow-up was addressed<br>(e) Describe any sensitivity analyses | 5       |
| <b>Results</b>               |         |                                                                                                                                                                                                                                                                                                                        |         |
| Participants                 | 13*     | (a) Report numbers of individuals at each stage of study—eg numbers potentially eligible, examined for eligibility, confirmed eligible, included in the study, completing follow-up, and analysed<br>(b) Give reasons for non-participation at each stage<br>(c) Consider use of a flow diagram                        | 6       |
| Descriptive data             | 14*     | (a) Give characteristics of study participants (eg demographic, clinical, social) and information on exposures and potential confounders<br>(b) Indicate number of participants with missing data for each variable of interest<br>(c) Summarise follow-up time (eg, average and total amount)                         | 5-6     |
| Outcome data                 | 15*     | Report numbers of outcome events or summary measures over time                                                                                                                                                                                                                                                         | 5-6     |

|    |                          |    |                                                                                                                                                                                                              |      |
|----|--------------------------|----|--------------------------------------------------------------------------------------------------------------------------------------------------------------------------------------------------------------|------|
| 1  | Main results             | 16 | (a) Give unadjusted estimates and, if applicable, confounder-adjusted estimates and their precision (eg, 95% confidence interval). Make clear which confounders were adjusted for and why they were included | 6-7  |
| 2  |                          |    | (b) Report category boundaries when continuous variables were categorized                                                                                                                                    |      |
| 3  |                          |    | (c) If relevant, consider translating estimates of relative risk into absolute risk for a meaningful time period                                                                                             |      |
| 4  |                          |    |                                                                                                                                                                                                              |      |
| 5  |                          |    |                                                                                                                                                                                                              |      |
| 6  |                          |    |                                                                                                                                                                                                              |      |
| 7  |                          |    |                                                                                                                                                                                                              |      |
| 8  |                          |    |                                                                                                                                                                                                              |      |
| 9  | Other analyses           | 17 | Report other analyses done—eg analyses of subgroups and interactions, and sensitivity analyses                                                                                                               | 6-7  |
| 10 |                          |    |                                                                                                                                                                                                              |      |
| 11 | <b>Discussion</b>        |    |                                                                                                                                                                                                              |      |
| 12 |                          |    |                                                                                                                                                                                                              |      |
| 13 | Key results              | 18 | Summarise key results with reference to study objectives                                                                                                                                                     | 7-8  |
| 14 | Limitations              | 19 | Discuss limitations of the study, taking into account sources of potential bias or imprecision. Discuss both direction and magnitude of any potential bias                                                   | 10   |
| 15 |                          |    |                                                                                                                                                                                                              |      |
| 16 | Interpretation           | 20 | Give a cautious overall interpretation of results considering objectives, limitations, multiplicity of analyses, results from similar studies, and other relevant evidence                                   | 8-10 |
| 17 |                          |    |                                                                                                                                                                                                              |      |
| 18 |                          |    |                                                                                                                                                                                                              |      |
| 19 | Generalisability         | 21 | Discuss the generalisability (external validity) of the study results                                                                                                                                        | 10   |
| 20 |                          |    |                                                                                                                                                                                                              |      |
| 21 | <b>Other information</b> |    |                                                                                                                                                                                                              |      |
| 22 | Funding                  | 22 | Give the source of funding and the role of the funders for the present study and, if applicable, for the original study on which the present article is based                                                | 11   |
| 23 |                          |    |                                                                                                                                                                                                              |      |
| 24 |                          |    |                                                                                                                                                                                                              |      |

\*Give information separately for exposed and unexposed groups.

**Note:** An Explanation and Elaboration article discusses each checklist item and gives methodological background and published examples of transparent reporting. The STROBE checklist is best used in conjunction with this article (freely available on the Web sites of PLoS Medicine at <http://www.plosmedicine.org/>, Annals of Internal Medicine at <http://www.annals.org/>, and Epidemiology at <http://www.epidem.com/>). Information on the STROBE Initiative is available at <http://www.strobe-statement.org>.

# BMJ Open

## Role of HDL cholesterol in anthracycline-induced subclinical cardiotoxicity: a prospective observational study in patients with diffuse large B-cell lymphoma treated with R-CHOP

|                                 |                                                                                                                                                                                                                                                                                                                                                                                                                                                                                                                                                                                                                                                                                                                                                                                                                                                                                                                                                                 |
|---------------------------------|-----------------------------------------------------------------------------------------------------------------------------------------------------------------------------------------------------------------------------------------------------------------------------------------------------------------------------------------------------------------------------------------------------------------------------------------------------------------------------------------------------------------------------------------------------------------------------------------------------------------------------------------------------------------------------------------------------------------------------------------------------------------------------------------------------------------------------------------------------------------------------------------------------------------------------------------------------------------|
| Journal:                        | <i>BMJ Open</i>                                                                                                                                                                                                                                                                                                                                                                                                                                                                                                                                                                                                                                                                                                                                                                                                                                                                                                                                                 |
| Manuscript ID                   | bmjopen-2023-074541.R2                                                                                                                                                                                                                                                                                                                                                                                                                                                                                                                                                                                                                                                                                                                                                                                                                                                                                                                                          |
| Article Type:                   | Original research                                                                                                                                                                                                                                                                                                                                                                                                                                                                                                                                                                                                                                                                                                                                                                                                                                                                                                                                               |
| Date Submitted by the Author:   | 14-Dec-2023                                                                                                                                                                                                                                                                                                                                                                                                                                                                                                                                                                                                                                                                                                                                                                                                                                                                                                                                                     |
| Complete List of Authors:       | Ou, Wenxin; The First Affiliated Hospital of Chongqing Medical University, Department of Hematology<br>Jiang, Tiantian; The First Affiliated Hospital of Chongqing Medical University, Department of Hematology<br>Zhang, Nan; The First Affiliated Hospital of Chongqing Medical University, Department of Cardiology<br>Lu, Kai; The First Affiliated Hospital of Chongqing Medical University, Department of Cardiology<br>Weng, Yue; The First Affiliated Hospital of Chongqing Medical University, Department of Hematology<br>Zhou, Xi; The First Affiliated Hospital of Chongqing Medical University, Department of Hematology<br>Wang, Dong; The First Affiliated Hospital of Chongqing Medical University, Department of Ultrasound<br>Dong, Qian; The First Affiliated Hospital of Chongqing Medical University, Department of Cardiology<br>Tang, Xiaoqiong; The First Affiliated Hospital of Chongqing Medical University, Department of Hematology |
| <b>Primary Subject Heading</b>: | Oncology                                                                                                                                                                                                                                                                                                                                                                                                                                                                                                                                                                                                                                                                                                                                                                                                                                                                                                                                                        |
| Secondary Subject Heading:      | Cardiovascular medicine, Medical management                                                                                                                                                                                                                                                                                                                                                                                                                                                                                                                                                                                                                                                                                                                                                                                                                                                                                                                     |
| Keywords:                       | Lymphoma < HAEMATOLOGY, CHEMOTHERAPY, CARDIOLOGY, Echocardiography < CARDIOLOGY                                                                                                                                                                                                                                                                                                                                                                                                                                                                                                                                                                                                                                                                                                                                                                                                                                                                                 |
|                                 |                                                                                                                                                                                                                                                                                                                                                                                                                                                                                                                                                                                                                                                                                                                                                                                                                                                                                                                                                                 |

SCHOLARONE™  
Manuscripts



I, the Submitting Author has the right to grant and does grant on behalf of all authors of the Work (as defined in the below author licence), an exclusive licence and/or a non-exclusive licence for contributions from authors who are: i) UK Crown employees; ii) where BMJ has agreed a CC-BY licence shall apply, and/or iii) in accordance with the terms applicable for US Federal Government officers or employees acting as part of their official duties; on a worldwide, perpetual, irrevocable, royalty-free basis to BMJ Publishing Group Ltd ("BMJ") its licensees and where the relevant Journal is co-owned by BMJ to the co-owners of the Journal, to publish the Work in this journal and any other BMJ products and to exploit all rights, as set out in our [licence](#).

The Submitting Author accepts and understands that any supply made under these terms is made by BMJ to the Submitting Author unless you are acting as an employee on behalf of your employer or a postgraduate student of an affiliated institution which is paying any applicable article publishing charge ("APC") for Open Access articles. Where the Submitting Author wishes to make the Work available on an Open Access basis (and intends to pay the relevant APC), the terms of reuse of such Open Access shall be governed by a Creative Commons licence – details of these licences and which [Creative Commons](#) licence will apply to this Work are set out in our licence referred to above.

Other than as permitted in any relevant BMJ Author's Self Archiving Policies, I confirm this Work has not been accepted for publication elsewhere, is not being considered for publication elsewhere and does not duplicate material already published. I confirm all authors consent to publication of this Work and authorise the granting of this licence.

# 1 Role of HDL cholesterol in anthracycline-induced subclinical 2 cardiotoxicity: a prospective observational study in patients 3 with diffuse large B-cell lymphoma treated with R-CHOP

4  
5 Wenxin Ou<sup>1</sup>, Tiantian Jiang<sup>1</sup>, Nan Zhang<sup>2</sup>, Kai Lu<sup>2</sup>, Yue Weng<sup>1</sup>, Xi Zhou<sup>1</sup>, Dong Wang<sup>3</sup>, Qian  
6 Dong<sup>2\*</sup>, Xiaoqiong Tang<sup>1\*</sup>

7  
8 <sup>1</sup> Department of Hematology, The First Affiliated Hospital of Chongqing Medical University,  
9 Chongqing, China

10 <sup>2</sup> Department of Cardiology, The First Affiliated Hospital of Chongqing Medical University,  
11 Chongqing, China

12 <sup>3</sup> Department of Ultrasound, The First Affiliated Hospital of Chongqing Medical University,  
13 Chongqing, China

14  
15 \*Corresponding Author: Qian Dong and Xiaoqiong Tang contributed equally to this work and  
16 are considered as co-corresponding authors.

17 Qian Dong<sup>2</sup>

18 1 Youyi Road, Yuzhong District, Chongqing, 400016, People's Republic of China

19 Email address: [203748@hospital.cqmu.edu.cn](mailto:203748@hospital.cqmu.edu.cn)

20 Xiaoqiong Tang<sup>1</sup>

21 1 Youyi Road, Yuzhong District, Chongqing, 400016, People's Republic of China

22 Email address: [tlscqmu@126.com](mailto:tlscqmu@126.com)

23  
24 **Keywords:** cardiotoxicity; DLBCL; anthracycline; HDL-C; GLS

## 26 ABSTRACT

27 **Objectives:** Anthracycline-induced cardiotoxicity is a debilitating cardiac dysfunction for which  
28 there are no effective treatments, making early prevention of anthracycline-induced subclinical  
29 cardiotoxicity (AISC) crucial. High-density lipoprotein cholesterol (HDL-C) plays role in cardio-  
30 protection, but its impact on AISC remains unclear. Our study aims to elucidate the protective  
31 capacity of HDL-C in AISC in patients with diffuse large B-cell lymphoma (DLBCL) treated with  
32 R-CHOP (cyclophosphamide, vincristine, doxorubicin, prednisone, and rituximab).

33 **Design:** Prospective observational study

34 **Setting:** Conducted in China from September 2020 to September 2022.

35 **Participant:** 70 chemotherapy-naïve patients newly diagnosed with DLBCL who were scheduled  
36 to receive the standard dose of R-CHOP; 60 participants included in a case-control study (DOI:  
37 10.1186/s12885-022-10085-6).

38 **Primary outcome measures:** Serum biomarkers, 2D speckle tracking echocardiography, and  
39 conventional echocardiography were measured at baseline, at the end of the 3rd and 6th cycle of  
40 R-CHOP, and 6 and 12 months post-chemotherapy.

41 **Results:** 24 patients experienced AISC, while 10 did not. 36 patients were lost to follow-up and  
42 death. Cox regression analysis showed that higher levels of HDL-C were associated with a  
43 significantly lower risk of AISC (unadjusted, hazard ratio [HR]=0.24, 95%CI: 0.09-0.67, P=0.006;  
44 adjusted, HR=0.27, 95%CI: 0.09-0.79, P=0.017). Patients without AISC had a more stable and  
45 higher HDL-C level during the follow-up period. HDL-C levels were significantly decreased from  
46 the end of the 3rd cycle of chemotherapy to the end of the 6th cycle of chemotherapy in all patients  
47 (P=0.034), and particularly in the AISC group (P=0.003). The highest level of HDL-C was  
48 significantly higher in patients without AISC than in those with AISC (1.52±0.49 vs. 1.22±0.29,  
49 P=0.034).

50 **Conclusions:** Our study suggests that higher HDL-C levels may associate with lower AISC risk  
51 in patients with DLBCL treated with R-CHOP. HDL-C could be a cardio-protective target, but  
52 further research is needed to confirm its benefits and limitations.

53 **Study registration number:** ChiCTR2100054721

#### 54 55 **Strengths and limitations of this study**

- 56 ● This prospective observational study contributes to our understanding of the association  
57 between HDL-C and AISC, offering a foundation for the development of early intervention  
58 and prevention strategies.
- 59 ● The study used advanced imaging techniques (2D-STE) to assess the subclinical cardiac  
60 dysfunction in the patients, which can provide more sensitive and accurate results compared  
61 to traditional echocardiography.
- 62 ● The study only included patients with DLBCL who received R-CHOP, which may limit the  
63 generalizability of the findings to patients with other types of cancer or chemotherapy  
64 regimens.
- 65 ● The relatively small sample size in this study may potentially impact the robustness and  
66 generalizability of our findings. Additional comprehensive studies, including both clinical  
67 and basic research, are necessary to fully evaluate the benefits and limitations of HDL-C as a  
68 cardio-protective strategy in anthracycline-treated cancer patients.

#### 69 70 **INTRODUCTION**

71 The improved management of cancer has led to a significant increase in the survival rate of cancer  
72 survivors(1). However, anthracycline, one of the most effective chemotherapeutic agents used to  
73 treat various cancers, is associated with potentially life-threatening and severe cardiovascular  
74 diseases(2). Studies have shown a significant increase in mortality in cancer patients with  
75 cardiovascular disease(3, 4). As advances in cancer treatment and an aging population continue,  
76 the number of patients with both conditions is rising(5). As a result, the field of cardio-oncology  
77 has become increasingly important in recent years.



1  
2  
3 78 Non-Hodgkin's lymphoma (NHL) is the 7th most common cancer in the United States and the  
4 79 most frequent hematologic malignancy globally, accounting for about 3% of cancer cases and  
5 80 deaths(6). Among NHL, DLBCL is the most prevalent type, representing approximately one-third  
6 81 of all cases(7). The combination of cyclophosphamide, vincristine, doxorubicin, and prednisone  
7 82 with rituximab (R-CHOP) is a standard first-line therapy that has substantially improved survival  
8 83 outcomes in patients with DLBCL(8). Nonetheless, anthracycline-containing chemotherapy agents  
9 84 are associated with cardiotoxicity, a major long-term adverse effect that significantly affects the  
10 85 quality of life and survival of cancer survivors.

11 86 Anthracycline-induced cardiotoxicity (AIC) is a devastating consequence of successful cancer  
12 87 treatment, often leading to hypokinetic cardiomyopathy and ultimately heart failure. AIC is an  
13 88 irreversible form of cardiac dysfunction for which no guidelines or accepted therapies for  
14 89 cardioprotection currently exist(9, 10). Therefore, early prevention and detection of AIC are  
15 90 crucial for providing opportunities for early intervention. Anthracycline-induced subclinical  
16 91 cardiotoxicity (AISC) is an early stage of AIC, characterized by abnormal echocardiography index  
17 92 without clinical symptoms(11). Early intervention is recommended by the 2022 International  
18 93 Cardio-Oncology Society (IC-OS) consensus statement once AISC is detected(12). Global  
19 94 longitudinal peak systolic strain (GLS) measured by 2D speckle tracking echocardiography can  
20 95 reliably identify most early myocardial deformation variations. In our study, we used early  
21 96 measurement of GLS to identify AISC(13, 14).

22 97 High-density lipoprotein (HDL) is the sole lipoprotein with protective attributes among the five  
23 98 types of lipoproteins. Its salutary effects include antioxidant, anti-inflammatory, and anti-apoptotic  
24 99 properties. Numerous preclinical investigations have suggested that HDL may have direct and  
25 100 indirect protective effects against AIC(15-17). The roles of HDL-cholesterol (HDL-C) and  
26 101 apolipoprotein A1 (ApoA1) in providing cardiovascular protection of HDL have been the subject  
27 102 of recent debate. Therefore, further investigation is warranted to explore the clinical data pertaining  
28 103 to the association between HDL and anthracycline-related cardiotoxicity.

29 104 We undertook an prospective observational study to investigate the potential impact of HDL-C on  
30 105 AISC. Using 2D speckle tracking echocardiography, we identified AISC and sought to establish  
31 106 any correlation between HDL-C and AISC. Additionally, we assessed the fluctuations in HDL-C  
32 107 levels during R-CHOP chemotherapy in chemotherapy-naïve patients recently diagnosed with  
33 108 DLBCL. Subsequently, our team conducted a case-control study, revealing that HDL-C serves as  
34 109 a predictive factor for AISC in patients with DLBCL treated with 3 cycles of (R)-CHOP(18). Both  
35 110 the case-control study and present study are from the same database of the registered study 'Study  
36 111 of Antineoplastic Drugs Induced Early Cardiotoxicity in Patients with  
37 112 Lymphoma'(ChiCTR2100054721). Even though this case-control study was analyzed with data  
38 113 from different parts of the same database for different objectives, the result underscores the  
39 114 significance of further investigating the relationship between HDL-C and AISC.

40 115

## 41 116 **METHODS**

### 42 117 **Study population**

1  
2  
3 118 We recruited chemotherapy-naïve patients newly diagnosed with DLBCL who were scheduled to  
4 119 receive the standard dose of R-CHOP chemotherapy regimen at our institution from September  
5 120 1<sup>st</sup>, 2020, to September 1<sup>st</sup>, 2022. Our inclusion criteria were as follows: newly diagnosed DLBCL,  
6 121 age between 18 and 80 years, Eastern Cooperative Oncology Group (ECOG) performance status  
7 122  $\leq 2$ , left ventricular ejection fraction (LVEF)  $\geq 50\%$ , and acceptable bone marrow, renal, and  
8 123 hepatic functions for chemotherapy. Conversely, our exclusion criteria were symptomatic heart  
9 124 failure, a history of myocardial ischemia, myocarditis, myocardial infarction, clinical or subclinical  
10 125 pericardial effusion, arrhythmia requiring medical intervention, a history of other cancers, under  
11 126 lipid-lowering treatment, and severe active infections such as syphilis, hepatitis, or human  
12 127 immunodeficiency virus (HIV) infection. This study shares its database with a case-control study  
13 128 previously conducted by our group, as referenced earlier(18). The patients enrolled in the two  
14 129 study were not identical because of a few differences in specific objectives, inclusion criteria, and  
15 130 exclusion criteria. In brief, the case-control study specifically included patients with DLBCL who  
16 131 received the standard dose of (R)-CHOP chemotherapy regimen (CHOP with or without rituximab  
17 132 combination), and patients undergoing lipid-lowering therapy were not excluded. In the current  
18 133 study, 10 of the 70 enrolled participants were not enrolled in the case-control study. More details  
19 134 can be seen in this case-control study(18).

### 135 **Treatment**

20 136 Patients received a total of 6 cycles of standard R-CHOP (cyclophosphamide at 750 mg/m<sup>2</sup> on D1,  
21 137 doxorubicin at 50 mg/m<sup>2</sup> on D1, vincristine at 1.4 [maximum 2] mg/m<sup>2</sup> on D1, and 100 mg  
22 138 prednisone on D1-5, with rituximab at 375 mg/m<sup>2</sup> on D1 in each cycle), with or without 2 cycles  
23 139 of rituximab maintenance (rituximab at 375 mg/m<sup>2</sup> on D1 in each cycle).

### 24 140 **Definition of subclinical cardiotoxicity**

25 141 According to the IC-OS consensus statement, the definition of subclinical cardiotoxicity was a  
26 142 relative GLS decrease from baseline [(baseline – current GLS)/baseline GLS] of  $>12\%$ , but with  
27 143 a normal left ventricular ejection fraction (LVEF)(12).

### 28 144 **Study protocol**

29 145 We defined 'baseline' as the initial assessment conducted before the initiation of the first cycle of  
30 146 chemotherapy. At baseline, the end of the 3rd cycle of R-CHOP, the end of the 6th cycle of R-  
31 147 CHOP, and 6 and 12 months after chemotherapy completion, all enrolled patients underwent  
32 148 conventional echocardiography, 2D speckle tracking echocardiography, and blood sampling.  
33 149 Every patient received electrocardiography (ECG) examination before every cycle of  
34 150 chemotherapy to ensure the safety of the treatment. Demographic data and clinical variables,  
35 151 including age, gender, body mass index (BMI), ECOG performance status, diabetes mellitus,  
36 152 hypertension, drinking history (an adult who has consumed more than 20 drinks in lifetime, with  
37 153 each drink is considered to have an average alcohol content of 12 g), and smoking history (an adult  
38 154 who has smoked at least 100 cigarettes in their lifetime) were collected at the time of enrollment.  
39 155 Left ventricular systolic dysfunction was measured by LVEF, fractional shortening (FS), left  
40 156 ventricular mass index (LVMI), left ventricular diastolic dimension (LVDd), E, e', E/e', and GLS.  
41 157 HDL-C, low-density lipoprotein cholesterol (LDL-C), cardiac troponin T (cTnT), high sensitivity

1  
2  
3 158 C-reactive protein (hsCRP), N-terminal prohormone of brain natriuretic peptide (NT-proBNP),  
4 159 total cholesterol (TC) and total triglyceride (TG) were measured. We used the baseline HDL-C  
5 160 level as a surrogate marker for HDL quantity. The patients were categorized into two groups based  
6 161 on the average HDL-C value for males and females in the modified criteria of the National  
7 162 Cholesterol Educated Program Adult Treatment Panel (NCEP ATP III)(19). High HDL-C was  
8 163 defined as a serum HDL-C $\geq$ 1.16mmol/L, while low HDL-C was defined as a serum HDL-  
9 164 C $<$ 1.16mmol/L. We determined the sample size using an online sample size calculator, which  
10 165 indicated a total requirement of 23 events(20).

### 14 166 **Statistical analysis**

15 167 The study was conducted with two aims: firstly, to evaluate the relationship between HDL-C and  
16 168 AISC; and secondly, to conduct a preliminary exploration of the differences in HDL-C and the  
17 169 variability of HDL-C changes between patients with and without AISC during the follow-up  
18 170 period. Continuous variables were expressed as mean $\pm$  standard deviation (SD) and compared  
19 171 using the t-test. Non-normally distributed variables were presented as median (Q1- Q3) and  
20 172 compared with the Wilcoxon Mann-Whitney test. Categorical variables were expressed as n (%)  
21 173 and compared using the Chi-square or Fisher's exact test, as appropriate. Correlation analysis was  
22 174 conducted to investigate the associations of change in HDL-C with change in GLS. The  
23 175 probabilities of survival were calculated using Kaplan-Meier methods and compared using Log-  
24 176 rank tests. Cox proportional-hazards regression models were conducted to assess the association  
25 177 between variables and AISC. Covariates for multivariable Cox regression models included age,  
26 178 sex, and variables that had a P-value of less than 0.15 in the univariable Cox regression analysis  
27 179 (GLS was excluded as it is the factor that defines AISC). Two multivariable Cox regression models  
28 180 were constructed: the first model included age and sex; and the second model included age, sex,  
29 181 hypertension, BMI, and E. Statistical analysis and visualization were performed using IBM SPSS  
30 182 V.22.0 and GraphPad Prism 8. Statistical tests were two-sided, with a P-value less than 0.05 being  
31 183 considered statically significant.

### 34 184 **Patient and public involvement**

35 185 None.

## 40 186

## 41 187 **RESULTS**

### 42 188 **Assessment of the association between HDL-C and AISC**

#### 43 189 *Study population and baseline characteristics*

44 190 This investigation enrolled a total of 70 patients with chemotherapy-naïve DLBCL and were  
45 191 planned to be treated with the standard R-CHOP regimen. Based on the baseline HDL-C level, we  
46 192 segregated the patients into two groups: the high-level group (HDL-C $\geq$  1.16mmol/L, n=28) and  
47 193 the low-level group (HDL-C $<$ 1.16mmol/L, n=42). Patients with drinking history had a greater  
48 194 chance of having a high HDL-C level (P=0.034). The patients with high HDL-C showed  
49 195 substantially higher total cholesterol (P=0.011), and lower total triglyceride (P=0.002). The  
50 196 baseline characteristics of the patients in both groups were well balanced (Table S1).

51 197

198 *High HDL-C was an independent protective target of anthracycline-induced subclinical*  
 199 *cardiotoxicity*

200 The clinical endpoint was defined as the first detection of AISC, and the median survival time of  
 201 the whole cohort was 16 months. The median survival time of patients with low HDL-C was 4  
 202 months, while that of patients with high HDL-C was not reached. The median follow-up time of  
 203 the cohort was 10 months. During the follow-up period, 24 patients experienced AISC, while 10  
 204 did not. Approximately half of the patients (n=36) were lost to follow-up and death. A flowchart  
 205 detailing the patients enrolled in the study can be found in Figure S1.

206 The log-rank test revealed that patients with higher HDL-C were less likely to experience AISC  
 207 (P=0.001, HR=0.26, 95%CI: 0.12-0.58) (Figure S2).

208 According to the results of the univariable Cox regression analysis, variables that had a P-value of  
 209 less than 0.15 including age, BMI, hypertension, GLS, E, and HDL-C group. Increasing age was  
 210 significantly associated with a decreased HR of 0.97 (95%CI 0.943-0.998, P=0.034) per 1-year  
 211 increase. BMI showed a HR of 1.09 (95% CI 0.97-1.22, P=0.139) per 1 kg/m<sup>2</sup> increase. Similarly,  
 212 hypertension had a HR of 0.22 (95% CI 0.03-1.62, P=0.136) for yes versus no. A lower GLS was  
 213 significantly associated with an increased HR of 1.46 (95% CI 1.20-1.77, P<0.001) per -1%  
 214 decrease. E velocity showed a HR of 1.03 (95% CI 1.00-1.06, P=0.075) per 1 cm/s increase. The  
 215 HDL-C group (high versus low) had a significantly lower HR of 0.24 (95% CI 0.09-0.67,  
 216 P=0.006). Further details about other variables can be found in Table S2.

217 The results of the multivariable Cox regression analysis showed that high HDL-C was significantly  
 218 associated with a lower risk of AISC after adjusting for age and sex (model 1) (HR=0.28,  
 219 95%CI:0.10=0.84, P=0.018). Similarly, after adjusting for age, sex, and variables that P<0.15 in  
 220 the univariable Cox regression analysis (excluding GLS as it defines AISC) (model 2), the same  
 221 association was observed (HR=0.27, 95%CI: 0.09-0.79, P=0.017). (Table 1)

222 Table 1. Outcomes of study participants.

|            | HR (95%CI)<br>(unadjusted) | P values     | HR (95%CI)<br>(adjusted*) | P values     | HR (95%CI)<br>(adjusted#) | P values     |
|------------|----------------------------|--------------|---------------------------|--------------|---------------------------|--------------|
| Low HDL-C  | Ref                        |              | Ref                       |              | Ref                       |              |
| High HDL-C | 0.24 (0.09-0.67)           | <b>0.006</b> | 0.28 (0.10-0.80)          | <b>0.018</b> | 0.27 (0.09- 0.79)         | <b>0.017</b> |

223 The endpoint was defined as the first detection of anthracycline-induced subclinical  
 224 cardiotoxicity.

225 Low HDL-C: HDL-C<1.16mmol/L; High HDL-C: HDL-C≥1.16mmol/L. \* Adjusted for age and  
 226 sex. #Adjusted for age, sex, hypertension, body mass index, E. HR, hazard ratio; HDL-C, high-  
 227 density lipoprotein-cholesterol.

228  
 229 **Preliminary exploration of the difference of HDL-C between patients with AISC and**  
 230 **without AISC**

231 *Study population and baseline characteristics*

232 In this analysis, we selectively included 34 of the enrolled patients who were not lost to follow-up  
 233 and death. The patients who exhibited AISC at any time during the follow-up period were  
 234 segregated into the AISC group (n=24), while those who did not demonstrate AISC were classified  
 235 into the NO-AISC group (n=10). Patients within the AISC group were comparatively younger

236 (50±12.45 vs. 59.7±9.67, P=0.035) and exhibited a higher baseline GLS [22.0 (21.0, 22.8) vs. 18.0  
237 (17.0, 20.0), P<0.001]. More baseline information can be seen in Table S3.

#### 238 *Timeline of HDL-C level in patients with and without AISC*

239 Figure 1 displays the timeline of HDL-C levels in patients with and without AISC. In Figure 1a,  
240 the patient population was categorized into four groups based on the time of AISC detection.  
241 Among the groups, 12 patients were identified with AISC at the end of the 3rd cycle of  
242 chemotherapy, 7 patients at the end of the 6th cycle, 3 patients at 6 months after treatment  
243 completion, and 2 patients at 12 months after treatment completion. With the exception of the  
244 group in which patients detected AISC at the end of the 3rd cycle of chemotherapy, all other groups  
245 exhibited a reduction in HDL-C values from the end of the 3rd cycle of chemotherapy to the end  
246 of the 6th cycle of chemotherapy. Figure 1b portrays the HDL-C level in patients without AISC,  
247 indicating that the HDL-C level was more stable than in patients with AISC. Moreover, the overall  
248 HDL-C level was higher in patients without AISC than in patients with AISC throughout the  
249 follow-up period (Figure 2a). In Figure 2b, there was a significant decrease in GLS during the  
250 chemotherapy period (from 0-4 months), which remained stable after completion of chemotherapy  
251 (after 4 months) in patients with AISC.

252 Based on Figure 2, we observed that the fluctuations in HDL-C and GLS were most pronounced  
253 during the chemotherapy period. The fluctuations in HDL-C levels of patients with DLBCL during  
254 R-CHOP chemotherapy were presented in Figure 3. The levels of HDL-C significantly increased  
255 for all patients from baseline to the end of the 3rd cycle of chemotherapy (P=0.012) and  
256 significantly decreased from the end of the 3rd cycle to the end of the 6th cycle of chemotherapy  
257 (P=0.034) (Figure 3a). Patients with AISC showed a significant decrease in HDL-C levels during  
258 R-CHOP chemotherapy from the end of the 3rd cycle to the end of the 6th cycle (P=0.003) (Figure  
259 3b). However, no significant difference was observed in HDL-C levels for patients without AISC  
260 during R-CHOP chemotherapy (Figure 3c). We conducted correlation analysis separately for the  
261 change in HDL-C and GLS from baseline to after 3 cycles of chemotherapy, from baseline to after  
262 6 cycles of chemotherapy, and from after 3 cycles to after 6 cycles of chemotherapy. However, we  
263 found no statistically significant differences in the associations between changes in HDL-C and  
264 GLS (P=0.965, 0.087, 0.449).

#### 265 *Contrasting values of HDL-C parameters between patients with and without AISC*

266 Figure 4 presents the contrasting values between patients with AISC and those without in terms of  
267 four parameters, namely the highest and lowest levels of HDL-C during chemotherapy, the  
268 increment and decline in HDL-C values from baseline. Patients without AISC showed significantly  
269 higher values in the highest level of HDL-C (1.52±0.49 vs. 1.22±0.29, P=0.034, Figure 4a).  
270 However, no significant differences were observed between the two groups in terms of HDL-C  
271 increment from baseline to the highest value (0.31±0.31 vs. 0.22±0.23, P=0.386, Figure 4b). While  
272 the lowest level of HDL-C was lower in patients with AISC, the difference was not statistically  
273 significant (0.84±0.16 vs. 1.03±0.41, P=0.182, Figure 4c). Furthermore, there were no significant  
274 differences in HDL-C decline between patients with AISC and those without (0.16±0.20 vs.  
275 0.18±0.26, P=0.777, Figure 4d).

1  
2  
3 2764 277 **DISCUSSION**

6 278 This prospective observational study investigated the relationship between HDL-C and incidence  
7 279 of AISC in 70 patients with DLBCL who were receiving anthracycline-containing chemotherapy.  
8 280 The study found that higher levels of HDL-C were associated with a lower incidence of AISC.  
9 281 Moreover, patients without AISC had more stable and higher levels of HDL-C than those with  
10 282 AISC during the follow-up period. The results also showed that HDL-C levels were significantly  
11 283 decreased from the end of the 3rd cycle of chemotherapy to the end of the 6th cycle of  
12 284 chemotherapy in all patients, especially in the AISC group, indicating that anthracycline-  
13 285 containing chemotherapy has adverse effects on HDL-C levels. Notably, the highest level of HDL-  
14 286 C was significantly higher in patients without AISC compared to those with AISC. These findings  
15 287 suggest that HDL-C may have a protective role against AISC in patients with DLBCL undergoing  
16 288 anthracycline-containing chemotherapy and maintaining a relatively high level of HDL-C may be  
17 289 more effective in managing cardio-protection than monitoring changes in HDL-C levels over time.  
18 290 The results of this study highlight the importance of early serum lipid management in these  
19 291 patients.

20 292 Lipoproteins are classified into five categories, namely chylomicron, very-low-density lipoprotein  
21 293 (VLDL), intermediate-density lipoprotein (IDL), low-density lipoprotein (LDL), and high-density  
22 294 lipoprotein (HDL), based on their size, density, and lipid composition (cholesterol and  
23 295 triglycerides)(21). Among these, HDL exhibits distinctive cytoprotective actions and triggers anti-  
24 296 oxidative, anti-inflammatory, and anti-apoptotic effects. The protective roles of HDL in  
25 297 cardiovascular disease have been controversial in recent years, and that the quality of HDL  
26 298 (cholesterol efflux capacity, antioxidant activity, anti-inflammatory activity, endothelial function,  
27 299 etc.) rather than the quantity of HDL has been proposed as the true cardioprotective effect. The  
28 300 Framingham Heart Study, as early as 1988, reported a correlation between HDL-C and  
29 301 cardiovascular mortality(22). Recent studies have challenged the HDL-C hypothesis by revealing  
30 302 that HDL-C level is not inversely correlated with cardiovascular diseases(23, 24). In our study, we  
31 303 used the baseline HDL-C level as a surrogate marker for HDL quantity, but we did not directly  
32 304 measure the quality of HDL. Measuring the level of HDL-C in serum is a commonly used method  
33 305 to assess the effect of HDL on cardiovascular health. HDL facilitates the transportation of  
34 306 cholesterol from the body's tissues back to the liver, and higher levels of HDL-C are generally  
35 307 associated with a lower risk of heart disease. Nevertheless, it's crucial to note that HDL-C levels  
36 308 may not accurately reflect the functional properties of HDL. ApoA1, the most abundant protein in  
37 309 HDL, is associated with several beneficial effects of HDL(15, 25). The function and abundance of  
38 310 ApoA1 are reported to play a dominant role in HDL quality(26). In the context of AIC, several  
39 311 studies have indicated that HDL can protect against anthracycline-induced cardiomyocyte  
40 312 apoptosis and atrophy in isolated cardiomyocytes(27, 28) and animal models(16, 28). Based on  
41 313 these earlier trials, HDL-C and ApoA1 could serve as protective factors against anthracycline-  
42 314 related cardiovascular disease. The case-control study conducted by our team, utilizing the same  
43 315 database, demonstrated that both HDL-C and ApoA1 act as predictive factors in patients

1  
2  
3 316 undergoing three cycles of anthracycline-containing chemotherapy(18). Both the present study and  
4 317 the case-control study are derived from a registered research (ChiCTR2100054721) as mentioned  
5 318 before. The objective of this registered study was to explore the correlation between cardiotoxicity  
6 319 occurrence and lymphoma, antitumor drugs, and cardiovascular risk factors. This registered study  
7 320 included patients with clinically diagnosed lymphoma who were evaluated by a hematologist as  
8 321 requiring chemotherapy. The study collected the demographic data and clinical variables of  
9 322 enrolled patients. Enrolled patients underwent conventional echocardiography, 2D speckle  
10 323 tracking echocardiography, and blood sampling at baseline, the end of the 3rd cycle of  
11 324 chemotherapy, the end of the 6th cycle of chemotherapy, and 6 and 12 months after completing  
12 325 chemotherapy. In our case-control study, according to the changes of GLS at baseline and after the  
13 326 3rd cycle of chemotherapy, patients were divided into the AISC and No-AISC groups. Then  
14 327 demographic data, clinical variables, and biochemical variables were compared between the two  
15 328 groups. In contrast to the current study, this case-control study specifically included patients with  
16 329 DLBCL who received the standard dose of (R)-CHOP chemotherapy regimen (CHOP with or  
17 330 without rituximab combination), and patients undergoing lipid-lowering therapy were not  
18 331 excluded. The aim of this case-control study was to analyze the influencing factors of AISC in  
19 332 patients with DLBCL treated with 3 cycles of (R)-CHOP chemotherapy regimen, and results  
20 333 indicated that both HDL-C and ApoA1 act as predictive factors against AISC. However, our  
21 334 present study didn't focus on the investigation of the impact of ApoA1 on AISC. Even when  
22 335 ApoA1 was included in the Cox regression model, no significant association with AISC in patients  
23 336 with DLBCL treated with R-CHOP was observed ( $P>0.05$ , data not shown), probably due to the  
24 337 number of events in our study was insufficient to support a robust ApoA1 analysis. Therefore, the  
25 338 role of ApoA1, the most abundant protein in HDL, in the context of AISC, warrants further  
26 339 investigation in future research.

27 340 As far as we know, few clinical studies have investigated the association between HDL-C and  
28 341 AISC. This study is the first clinical research that utilizes the IC-OS consensus statement(12) to  
29 342 define subclinical cardiotoxicity, with univariate and multivariable analyses being used to identify  
30 343 the influential factors of AISC in patients with DLBCL in this cohort. Kaplan-Meier methods and  
31 344 Log-rank tests reveal that patients with high HDL-C levels were less likely to develop AISC. After  
32 345 subjecting it to univariate and multivariable Cox regression methods, high HDL-C levels still  
33 346 showed statistically significant differences. These results suggest that high HDL-C could be a  
34 347 potentially independent protective factor for AISC in patients with DLBCL and provide an  
35 348 opportunity for investigators to develop a tool for early intervention and prevention of AISC.  
36 349 Further research is necessary to confirm our findings.

37 350 Several studies have demonstrated that serum lipid levels are altered during anthracycline-  
38 351 containing chemotherapy in cancer patients(29, 30). Huxley et al and Averina et al have shown  
39 352 that imbalanced serum lipid distribution is a risk factor for cardiovascular disease(31, 32). As a  
40 353 result, anthracycline-containing treatment can induce dyslipidemia and facilitate the occurrence  
41 354 and development of cardiovascular diseases in cancer patients. In a study of 394 breast cancer  
42 355 patients, Xin et al found that HDL-C levels after chemotherapy were significantly lower than those

1  
2  
3 356 before chemotherapy(33). Similarly, Lu et al and Hana et al found that HDL-C levels were  
4 357 significantly decreased during anthracycline-containing chemotherapy in patients with breast  
5 358 cancer(34, 35). In our study, we specifically assessed the changes in HDL-C levels over time  
6 359 during follow-up. Except for the group of patients who experienced AISC at 12 months after  
7 360 treatment completion, HDL-C levels in all other groups increased from baseline to the 3rd cycle  
8 361 of chemotherapy. This phenomenon may be due to the fact that anti-tumor drugs require  
9 362 cholesterol to cross cell membranes(36). However, HDL-C levels were significantly decreased  
10 363 from the end of the 3rd cycle of chemotherapy to the end of the 6th cycle of chemotherapy in all  
11 364 patients, especially in the AISC group, which is consistent with previous research results(33-35),  
12 365 and further confirmed that anthracycline-contained chemotherapy has adverse effects on HDL-C  
13 366 levels in patients with DLBCL. The HDL-C level in patients without AISC was more stable than  
14 367 that in patients with AISC. Therefore, anthracycline-containing chemotherapy may promote the  
15 368 occurrence and development of cardiotoxicity in patients with DLBCL by inducing HDL-C  
16 369 turbulence.

17  
18  
19  
20  
21  
22 370 Besides, the findings of our study indicate a significant decrease in GLS during the chemotherapy  
23 371 period in patients with AISC. This result is consistent with previous research, which has reported  
24 372 that doxorubicin dose at the range of 100-150mg/m<sup>2</sup> can cause cardiotoxicity(37). Notably, we  
25 373 also observed that GLS remained stable after completion of chemotherapy, suggesting that the  
26 374 cardiac effects of anthracycline-based chemotherapy may be dose-related. These findings have  
27 375 important implications for the monitoring and management of cardiotoxicity in patients  
28 376 undergoing anthracycline-based chemotherapy, as early detection of cardiac dysfunction during  
29 377 treatment may improve patient outcomes. We investigated the associations of change in HDL-C  
30 378 with change in GLS, no statistically significant differences were found.

31  
32  
33  
34 379 The analysis of HDL-C levels should not only consider the changes over time, but also the absolute  
35 380 values. In our study, patients without AISC had significantly higher absolute highest HDL-C levels  
36 381 than those with AISC, while the absolute lowest HDL-C levels did not differ significantly between  
37 382 the two groups. The alterations from HDL-C extremes to baseline did not exhibit any variation  
38 383 between the groups either. This suggests that the highest absolute HDL-C value was a preferable  
39 384 indicator of AISC protection than the change in HDL-C from baseline to the extremum value.  
40 385 Maintaining a relatively high level of HDL-C may be more effective in managing the cardio-  
41 386 protection of anthracycline-treated cancer patients than monitoring changes in HDL-C levels over  
42 387 time.

43  
44  
45 388 In our investigation, we observed that among the four patients with pre-existing hypertension, one  
46 389 patient experienced AISC during the follow-up (Table S3). Multivariable Cox regression analysis  
47 390 showed that hypertension did not have a significant impact on AISC (P>0.05). Hypertension, a  
48 391 common risk factor for both cancer and cardiovascular diseases, was also recognized as a risk  
49 392 factor for cardiotoxicity. Studies have reported that pre-existing hypertension was associated with  
50 393 anthracycline-and trastuzumab induced left ventricular ejection fraction (LVEF) decline in a  
51 394 retrospective study(38), and early left ventricular systolic dysfunction in patients with lymphoma  
52 395 receiving (R)-CHOP in a prospective study(39). We noted that all patients with hypertension in  
53  
54  
55  
56  
57  
58  
59  
60



our study were under a single antihypertensive drug regimen (beta-blockers or ACEI/ARB) to manage their blood pressure. Two meta-analyses have demonstrated that beta-blockers and ACEI can prevent cardiotoxicity caused by chemotherapy (40, 41). We speculate that the protective effects of beta-blockers and ACEI/ARB may have contributed to the result observed in our study regarding the relationship between hypertension and AISC.

There are several limitations to our study that must be acknowledged. Firstly, while our study highlights the potential importance of HDL-C in managing AISC, additional studies are necessary to fully evaluate the benefits and limitations of HDL-C as a cardio-protective strategy in anthracycline-treated cancer patients. Secondly, this is a single-center prospective observational study with a medium sample size. To confirm our findings, a larger sample size study conducted at multiple centers is needed. Thirdly, previous studies have suggested that there may be a reversed U-shaped relationship between HDL-C levels and cardiovascular diseases(42). Due to the small sample size of this study, we didn't further investigate the influence of extremely high levels of HDL-C on cardiotoxicity, and further clinical studies should be done to verify it. Besides, the measurement of GLS was only taken at baseline and at several points throughout the chemotherapy treatment and follow-up period. It is crucial to extend the duration of follow-up in future research to obtain a more comprehensive understanding of the long-term effects of anthracycline treatment on cardiovascular health.

414

## 415 **CONCLUSIONS**

In conclusion, our prospective observational study suggests that higher levels of HDL-C may be associated with a lower risk of AISC in patients with DLBCL treated with R-CHOP chemotherapy. HDL-C levels remained stable and consistently higher in patients without AISC compared to those with AISC. Additionally, the highest absolute HDL-C value was found to be a preferable indicator of AISC protection. These findings suggest that HDL-C may be a potential cardio-protective target for managing AISC in this patient population. However, further research is needed to confirm and expand on these findings, including determining the optimal HDL-C level for cardio-protection and the potential benefits of early serum lipid management.

424

## 425 **ACKNOWLEDGMENTS**

The authors would like to thank all the nurses, other medical workers and patients' families who assisted in this study.

428

## 429 **COMPETING INTERESTS**

The authors declare no conflict of interest.

431

## 432 **FUNDING**

This research was funded by the Science-Health Joint Medical Scientific Research Project of Chongqing "Study of antineoplastic drugs induced early cardiotoxicity in patients with Lymphoma" (Grant No. 2021MSXM276), the Natural Science Foundation of Chongqing "The mechanism of

1  
2  
3 436 doxorubicin promoting atherosclerosis in lymphoma patients through NF- $\kappa$ B/miR-33 signaling  
4 437 pathway” (Grant No. cstc2019jcyj-msxmX0043), the Science-Health Joint Medical Scientific  
5 438 Research Project of Chongqing “Evaluation of cardiac function in patients with anthracycline  
6 439 chemotherapy by a new strain imaging technique” (Gant No. 2019ZDXM033), and the Chongqing  
7 440 Postgraduate Scientific Research and Innovation Project “Study on the role of high-density  
8 441 lipoprotein in anthracycline-induced subclinical cardiotoxicity in patients with lymphoma” (Grant  
9 442 No. CYS22340).

12 443

## 13 444 **CONTRIBUTORS**

14 445 Conceptualization, Wenxin Ou, Tiantian Jiang, Nan Zhang, Kai Lu, Yue Weng, Xi Zhou, Dong  
15 446 Wang, Qian Dong and Xiaoqiong Tang; Data curation, Wenxin Ou, Tiantian Jiang, Yue Weng and  
16 447 Xi Zhou; Formal analysis, Wenxin Ou and Tiantian Jiang; Funding acquisition, Wenxin Ou, Nan  
17 448 Zhang, Dong Wang and Xiaoqiong Tang; Investigation, Dong Wang, Qian Dong and Xiaoqiong  
18 449 Tang; Methodology, Wenxin Ou, Tiantian Jiang, Nan Zhang, Kai Lu, Yue Weng, Xi Zhou, Dong  
19 450 Wang, Qian Dong and Xiaoqiong Tang; Resources, Dong Wang, Qian Dong and Xiaoqiong Tang;  
20 451 Supervision, Qian Dong and Xiaoqiong Tang; Validation, Nan Zhang and Kai Lu; Visualization,  
21 452 Wenxin Ou and Tiantian Jiang; Writing – original draft, Wenxin Ou; Writing – review & editing,  
22 453 Wenxin Ou, Tiantian Jiang, Nan Zhang, Kai Lu, Yue Weng, Xi Zhou, Dong Wang, Qian Dong  
23 454 and Xiaoqiong Tang. Qian Dong and Xiaoqiong Tang contributed equally to this work and are  
24 455 considered as co-corresponding authors.

29 456

## 30 457 **DATA AVAILABILITY STATEMENT**

31 458 Data are available upon reasonable request.

33 459

## 34 460 **ETHICS APPROVAL**

35 461 The study was conducted in accordance with the Declaration of Helsinki and approved by the  
36 462 ethics committee of the First Affiliated Hospital of Chongqing Medical University (Approval NO.  
37 463 2018-016). And all participating patients provided written informed consent.

40 464

## 41 465 **REFERENCES**

- 42 466 1. Rosen MR, Myerburg RJ, Francis DP, Cole GD, Marbán E. Translating stem cell  
43 467 research to cardiac disease therapies: pitfalls and prospects for improvement. *J Am Coll*  
44 468 *Cardiol.* 2014;64(9):922-37.
- 45 469 2. Minotti G, Menna P, Salvatorelli E, Cairo G, Gianni L. Anthracyclines: molecular  
46 470 advances and pharmacologic developments in antitumor activity and cardiotoxicity. *Pharmacol*  
47 471 *Rev.* 2004;56(2):185-229.
- 48 472 3. Hasin T, Gerber Y, McNallan SM, Weston SA, Kushwaha SS, Nelson TJ, et al. Patients  
49 473 with heart failure have an increased risk of incident cancer. *J Am Coll Cardiol.* 2013;62(10):881-  
50 474 6.
- 51 475 4. Abdel-Qadir H, Austin PC, Lee DS, Amir E, Tu JV, Thavendiranathan P, et al. A  
52 476 Population-Based Study of Cardiovascular Mortality Following Early-Stage Breast Cancer.  
53 477 *JAMA Cardiol.* 2017;2(1):88-93.

- 1  
2  
3 478 5. Stoltzfus KC, Zhang Y, Sturgeon K, Sinoway LI, Trifiletti DM, Chinchilli VM, et al. Fatal  
4 479 heart disease among cancer patients. *Nat Commun.* 2020;11(1):2011.
- 5 480 6. Thandra KC, Barsouk A, Saginala K, Padala SA, Barsouk A, Rawla P. Epidemiology of  
6 481 Non-Hodgkin's Lymphoma. *Med Sci (Basel).* 2021;9(1).
- 7 482 7. Teras LR, DeSantis CE, Cerhan JR, Morton LM, Jemal A, Flowers CR. 2016 US  
8 483 lymphoid malignancy statistics by World Health Organization subtypes. *CA Cancer J Clin.*  
9 484 2016;66(6):443-59.
- 10 485 8. Salles G, Barrett M, Foà R, Maurer J, O'Brien S, Valente N, et al. Rituximab in B-Cell  
11 486 Hematologic Malignancies: A Review of 20 Years of Clinical Experience. *Adv Ther.*  
12 487 2017;34(10):2232-73.
- 13 488 9. McGowan JV, Chung R, Maulik A, Piotrowska I, Walker JM, Yellon DM. Anthracycline  
14 489 Chemotherapy and Cardiotoxicity. *Cardiovasc Drugs Ther.* 2017;31(1):63-75.
- 15 490 10. Russell RR, Alexander J, Jain D, Poornima IG, Srivastava AV, Storozynsky E, et al. The  
16 491 role and clinical effectiveness of multimodality imaging in the management of cardiac  
17 492 complications of cancer and cancer therapy. *J Nucl Cardiol.* 2016;23(4):856-84.
- 18 493 11. Curigliano G, Lenihan D, Fradley M, Ganatra S, Barac A, Blaes A, et al. Management of  
19 494 cardiac disease in cancer patients throughout oncological treatment: ESMO consensus  
20 495 recommendations. *Ann Oncol.* 2020;31(2):171-90.
- 21 496 12. Herrmann J, Lenihan D, Armenian S, Barac A, Blaes A, Cardinale D, et al. Defining  
22 497 cardiovascular toxicities of cancer therapies: an International Cardio-Oncology Society (IC-OS)  
23 498 consensus statement. *Eur Heart J.* 2022;43(4):280-99.
- 24 499 13. Fallah-Rad N, Walker JR, Wassef A, Lytwyn M, Bohonis S, Fang T, et al. The utility of  
25 500 cardiac biomarkers, tissue velocity and strain imaging, and cardiac magnetic resonance imaging  
26 501 in predicting early left ventricular dysfunction in patients with human epidermal growth factor  
27 502 receptor II-positive breast cancer treated with adjuvant trastuzumab therapy. *J Am Coll Cardiol.*  
28 503 2011;57(22):2263-70.
- 29 504 14. Negishi K, Negishi T, Haluska BA, Hare JL, Plana JC, Marwick TH. Use of speckle strain  
30 505 to assess left ventricular responses to cardiotoxic chemotherapy and cardioprotection. *Eur*  
31 506 *Heart J Cardiovasc Imaging.* 2014;15(3):324-31.
- 32 507 15. Kluck GEG, Durham KK, Yoo JA, Trigatti BL. High Density Lipoprotein and Its Precursor  
33 508 Protein Apolipoprotein A1 as Potential Therapeutics to Prevent Anthracycline Associated  
34 509 Cardiotoxicity. *Front Cardiovasc Med.* 2020;7:65.
- 35 510 16. Durham KK, Chathely KM, Mak KC, Momen A, Thomas CT, Zhao YY, et al. HDL  
36 511 protects against doxorubicin-induced cardiotoxicity in a scavenger receptor class B type 1-,  
37 512 PI3K-, and Akt-dependent manner. *Am J Physiol Heart Circ Physiol.* 2018;314(1):H31-h44.
- 38 513 17. Van Linthout S, Frias M, Singh N, De Geest B. Therapeutic potential of HDL in  
39 514 cardioprotection and tissue repair. *Handb Exp Pharmacol.* 2015;224:527-65.
- 40 515 18. Dong Q, Ou W, Wang M, Jiang T, Weng Y, Zhou X, et al. Study on influencing factors of  
41 516 anthracycline-induced subclinical cardiotoxicity in DLBCL patients administered (R)-CHOP.  
42 517 *BMC Cancer.* 2022;22(1):988.
- 43 518 19. Executive Summary of The Third Report of The National Cholesterol Education Program  
44 519 (NCEP) Expert Panel on Detection, Evaluation, And Treatment of High Blood Cholesterol In  
45 520 Adults (Adult Treatment Panel III). *Jama.* 2001;285(19):2486-97.
- 46 521 20. MA K, J S. Sample Size Calculators [website]: UCSF CTSI; 20 December 2021  
47 522 [Available from: <https://www.sample-size.net/>].
- 48 523 21. Mahley RW, Innerarity TL, Rall SC, Jr., Weisgraber KH. Plasma lipoproteins:  
49 524 apolipoprotein structure and function. *J Lipid Res.* 1984;25(12):1277-94.
- 50 525 22. Wilson PW, Abbott RD, Castelli WP. High density lipoprotein cholesterol and mortality.  
51 526 The Framingham Heart Study. *Arteriosclerosis.* 1988;8(6):737-41.

- 1  
2  
3 527 23. Schwartz GG, Olsson AG, Abt M, Ballantyne CM, Barter PJ, Brumm J, et al. Effects of  
4 528 dalcetrapib in patients with a recent acute coronary syndrome. *N Engl J Med*.  
5 529 2012;367(22):2089-99.
- 6 530 24. Lincoff AM, Nicholls SJ, Riesmeyer JS, Barter PJ, Brewer HB, Fox KAA, et al.  
7 531 Evacetrapib and Cardiovascular Outcomes in High-Risk Vascular Disease. *N Engl J Med*.  
8 532 2017;376(20):1933-42.
- 9 533 25. Rader DJ. Molecular regulation of HDL metabolism and function: implications for novel  
10 534 therapies. *J Clin Invest*. 2006;116(12):3090-100.
- 11 535 26. Smith JD. Dysfunctional HDL as a diagnostic and therapeutic target. *Arterioscler Thromb*  
12 536 *Vasc Biol*. 2010;30(2):151-5.
- 13 537 27. Brinck JW, Thomas A, Brulhart-Meynet MC, Lauer E, Frej C, Dahlbäck B, et al. High-  
14 538 density lipoprotein from end-stage renal disease patients exhibits superior cardioprotection and  
15 539 increase in sphingosine-1-phosphate. *Eur J Clin Invest*. 2018;48(2).
- 16 540 28. Durham KK, Kluck G, Mak KC, Deng YD, Trigatti BL. Treatment with apolipoprotein A1  
17 541 protects mice against doxorubicin-induced cardiotoxicity in a scavenger receptor class B, type I-  
18 542 dependent manner. *Am J Physiol Heart Circ Physiol*. 2019;316(6):H1447-h57.
- 19 543 29. Bicakli DH, Varol U, Degirmenci M, Tunali D, Cakar B, Durusoy R, et al. Adjuvant  
20 544 chemotherapy may contribute to an increased risk for metabolic syndrome in patients with  
21 545 breast cancer. *J Oncol Pharm Pract*. 2016;22(1):46-53.
- 22 546 30. Rzymowska J. Effect of cytotoxic chemotherapy on serum lipid levels in breast cancer  
23 547 patients. *Pathobiology*. 1999;67(3):129-32.
- 24 548 31. Huxley R, Lewington S, Clarke R. Cholesterol, coronary heart disease and stroke: a  
25 549 review of published evidence from observational studies and randomized controlled trials.  
26 550 *Semin Vasc Med*. 2002;2(3):315-23.
- 27 551 32. Averina M, Nilssen O, Brenn T, Brox J, Arkhipovsky VL, Kalinin AG. Factors behind the  
28 552 increase in cardiovascular mortality in Russia: apolipoprotein AI and B distribution in the  
29 553 Arkhangelsk study 2000. *Clin Chem*. 2004;50(2):346-54.
- 30 554 33. Li X, Liu ZL, Wu YT, Wu H, Dai W, Arshad B, et al. Status of lipid and lipoprotein in  
31 555 female breast cancer patients at initial diagnosis and during chemotherapy. *Lipids Health Dis*.  
32 556 2018;17(1):91.
- 33 557 34. Kalábová H, Melichar B, Ungermann L, Doležal J, Krčmová L, Kašparová M, et al.  
34 558 Intima-media thickness, myocardial perfusion and laboratory risk factors of atherosclerosis in  
35 559 patients with breast cancer treated with anthracycline-based chemotherapy. *Med Oncol*.  
36 560 2011;28(4):1281-7.
- 37 561 35. Lu Q, Wu X, Zhu Y, Yang J, Wang X, Ye C, et al. Effects of Chemotherapy on Serum  
38 562 Lipids in Chinese Postoperative Breast Cancer Patients. *Cancer Manag Res*. 2020;12:8397-  
39 563 408.
- 40 564 36. Zhang L, Bennett WF, Zheng T, Ouyang PK, Ouyang X, Qiu X, et al. Effect of  
41 565 Cholesterol on Cellular Uptake of Cancer Drugs Pirarubicin and Ellipticine. *J Phys Chem B*.  
42 566 2016;120(12):3148-56.
- 43 567 37. Blanco JG, Sun CL, Landier W, Chen L, Esparza-Duran D, Leisenring W, et al.  
44 568 Anthracycline-related cardiomyopathy after childhood cancer: role of polymorphisms in carbonyl  
45 569 reductase genes--a report from the Children's Oncology Group. *J Clin Oncol*. 2012;30(13):1415-  
46 570 21.
- 47 571 38. Hamirani Y, Fanous I, Kramer CM, Wong A, Salerno M, Dillon P. Anthracycline- and  
48 572 trastuzumab-induced cardiotoxicity: a retrospective study. *Med Oncol*. 2016;33(7):82.
- 49 573 39. Szmit S, Jurczak W, Zaucha JM, Drozd-Sokołowska J, Spychałowicz W, Joks M, et al.  
50 574 Pre-existing arterial hypertension as a risk factor for early left ventricular systolic dysfunction  
51 575 following (R)-CHOP chemotherapy in patients with lymphoma. *J Am Soc Hypertens*.  
52 576 2014;8(11):791-9.

- 1  
2  
3 577 40. Shah P, Garris R, Abboud R, Vasudev R, Patel H, Doshi R, et al. Meta-Analysis  
4 578 Comparing Usefulness of Beta Blockers to Preserve Left Ventricular Function During  
5 579 Anthracycline Therapy. *Am J Cardiol.* 2019;124(5):789-94.  
6 580 41. Dong H, Yao L, Wang M, Wang M, Li X, Sun X, et al. Can ACEI/ARB prevent the  
7 581 cardiotoxicity caused by chemotherapy in early-stage breast cancer?-a meta-analysis of  
8 582 randomized controlled trials. *Transl Cancer Res.* 2020;9(11):7034-43.  
9 583 42. Feng M, Darabi M, Tubeuf E, Canicio A, Lhomme M, Frisdal E, et al. Free cholesterol  
10 584 transfer to high-density lipoprotein (HDL) upon triglyceride lipolysis underlies the U-shape  
11 585 relationship between HDL-cholesterol and cardiovascular disease. *Eur J Prev Cardiol.*  
12 586 2020;27(15):1606-16.  
13 587  
14 588

## 589 FIGURE LEGENDS

15 588  
16 589  
17  
18 590 **Figure 1.** (a) Timeline of high-density lipoprotein cholesterol (HDL-C) levels in patients  
19 591 detected anthracycline-induced subclinical cardiotoxicity (AISC) at four time points. 12 patients  
20 592 were detected AISC at the end of the 3rd cycle of chemotherapy. 7 patients were detected AISC  
21 593 at the end of the 6th cycle of chemotherapy. 3 patients were detected AISC at 6 months after  
22 594 treatment completion. 2 patients were detected AISC at 12 months after treatment completion.

23 595 (b) Timeline of HDL-C levels of patients without AISC.

24 596 **Figure 2.** Timeline of high-density lipoprotein cholesterol (HDL-C) levels (a) and global  
25 597 longitudinal strain (GLS) (b) in patients with and without anthracycline-induced subclinical  
26 598 cardiotoxicity (AISC) during the whole follow-up period.

27 599 **Figure 3.** (a) Changes of high-density lipoprotein cholesterol (HDL-C) in all patients from  
28 600 baseline to the end of the 6th cycle of chemotherapy. (b) Changes of HDL-C in patients with  
29 601 anthracycline-induced subclinical cardiotoxicity (AISC). (c) Changes of HDL-C in patients  
30 602 without AISC.

31 603 **Figure 4.** High-density lipoprotein cholesterol (HDL-C) differences between anthracycline-  
32 604 induced subclinical cardiotoxicity (AISC) and No-AISC. (a) Highest level of HDL-C during  
33 605 chemotherapy. (b) The HDL-C value increment from baseline to the highest value. (c) The lowest  
34 606 level of HDL-C during chemotherapy. (d) The HDL-C value declined from baseline to the  
35 607 lowest.  
36 608  
37 609

1  
2  
3  
4  
5  
6  
7  
8  
9  
10  
11  
12  
13  
14  
15  
16  
17  
18  
19  
20  
21  
22  
23  
24  
25  
26  
27  
28  
29  
30  
31  
32  
33  
34  
35  
36  
37  
38  
39  
40  
41  
42  
43  
44  
45  
46  
47  
48  
49  
50  
51  
52  
53  
54  
55  
56  
57  
58  
59  
60

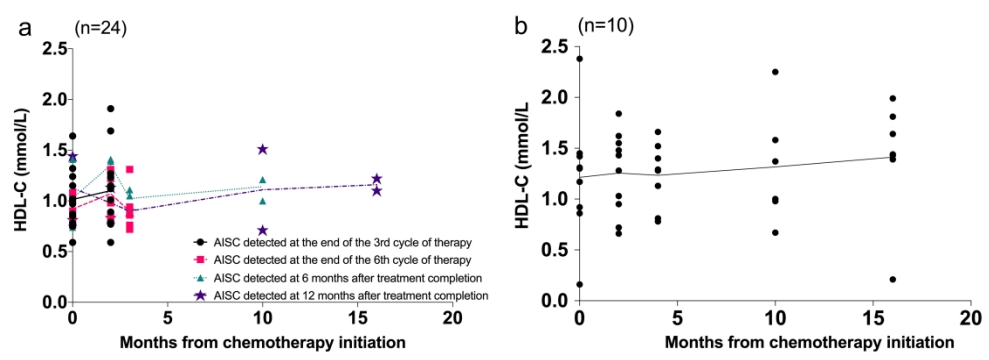

420x144mm (300 x 300 DPI)

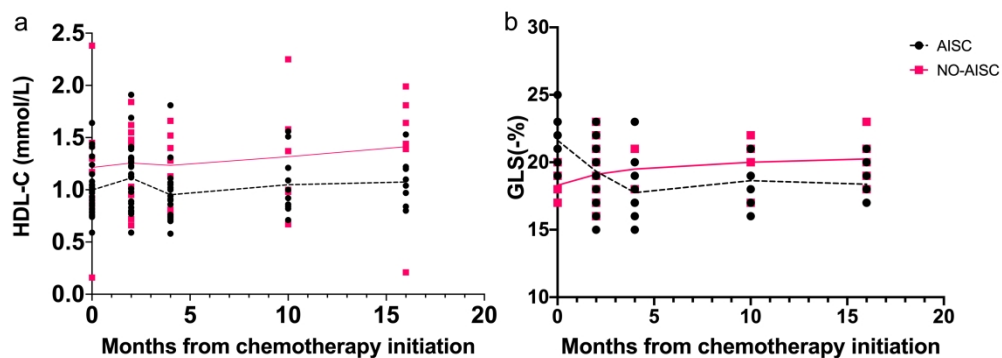

325x117mm (300 x 300 DPI)

1  
2  
3  
4  
5  
6  
7  
8  
9  
10  
11  
12  
13  
14  
15  
16  
17  
18  
19  
20  
21  
22  
23  
24  
25  
26  
27  
28  
29  
30  
31  
32  
33  
34  
35  
36  
37  
38  
39  
40  
41  
42  
43  
44  
45  
46  
47  
48  
49  
50  
51  
52  
53  
54  
55  
56  
57  
58  
59  
60

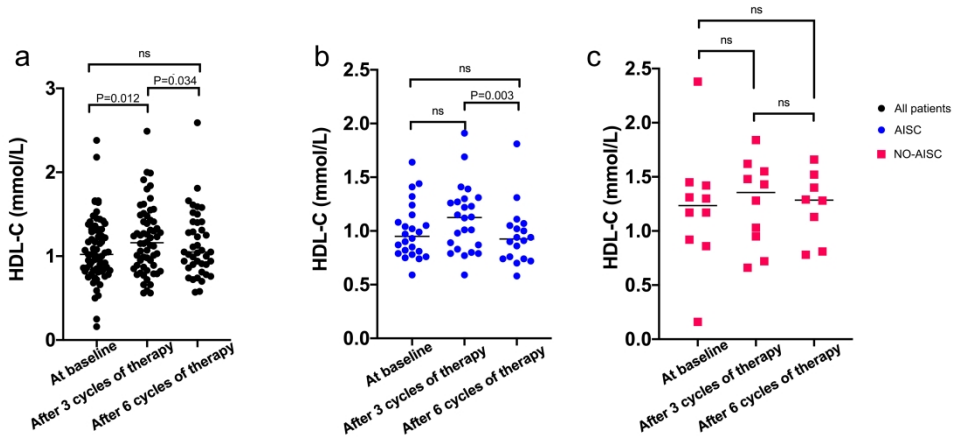

365x166mm (300 x 300 DPI)



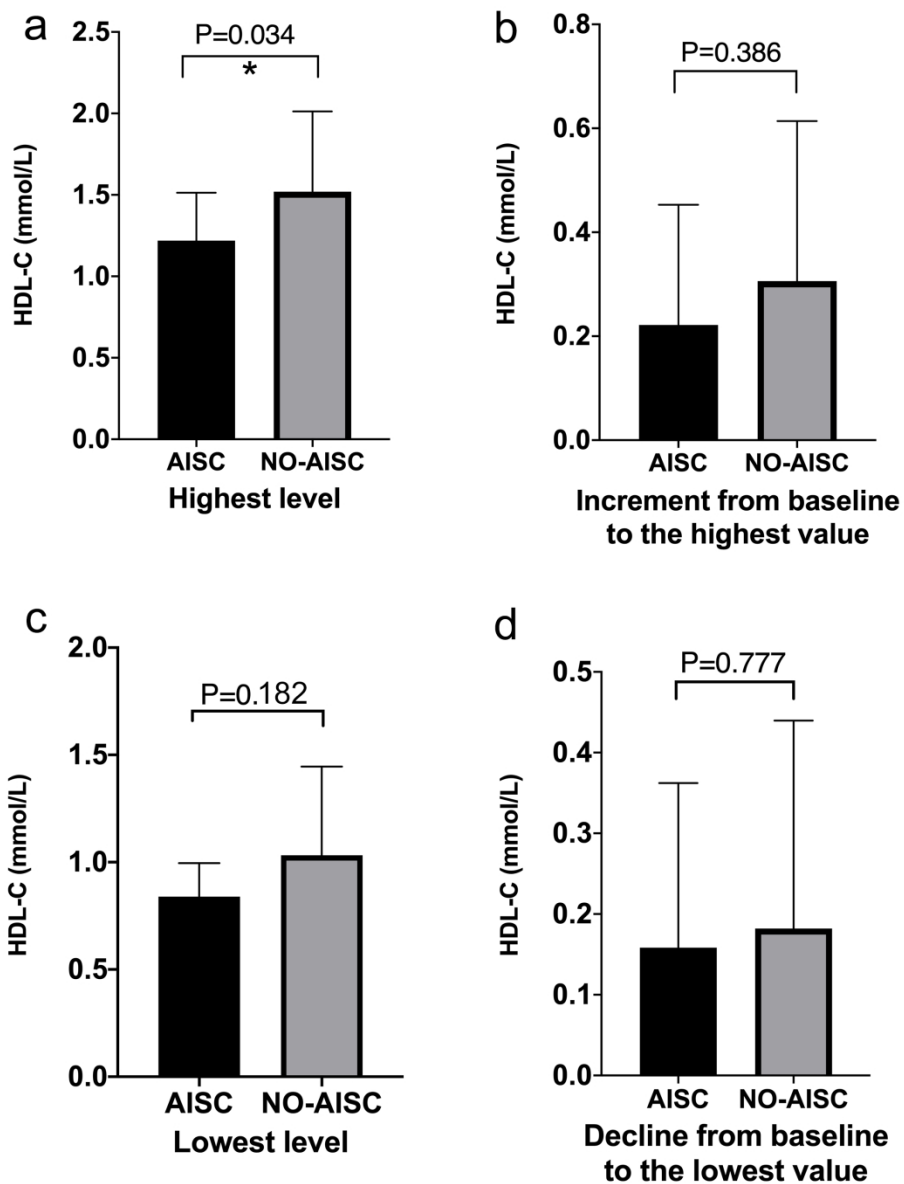

206x267mm (300 x 300 DPI)

1  
2  
3  
4  
5  
6  
7  
8  
9  
10  
11  
12  
13  
14  
15  
16  
17  
18  
19  
20  
21  
22  
23  
24  
25  
26  
27  
28  
29  
30  
31  
32  
33  
34  
35  
36  
37  
38  
39  
40  
41  
42  
43  
44  
45  
46  
47  
48  
49  
50  
51  
52  
53  
54  
55  
56  
57  
58  
59  
60

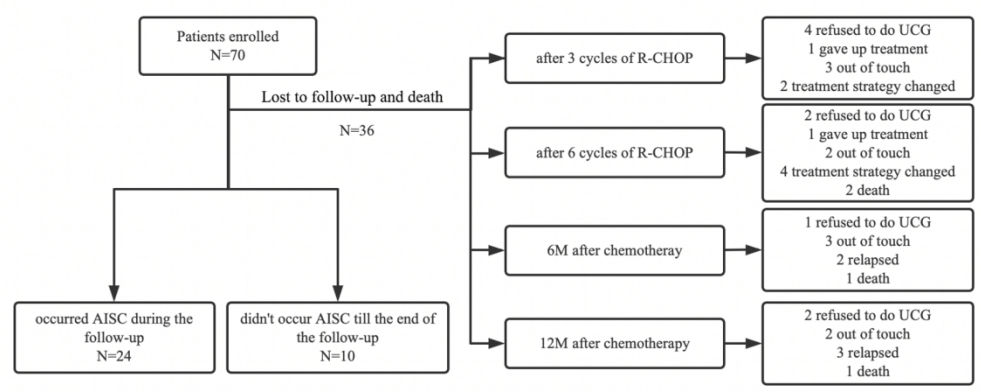

Figure S1. Flow diagram of patients enrolled in the prospective observational study.

148x68mm (300 x 300 DPI)

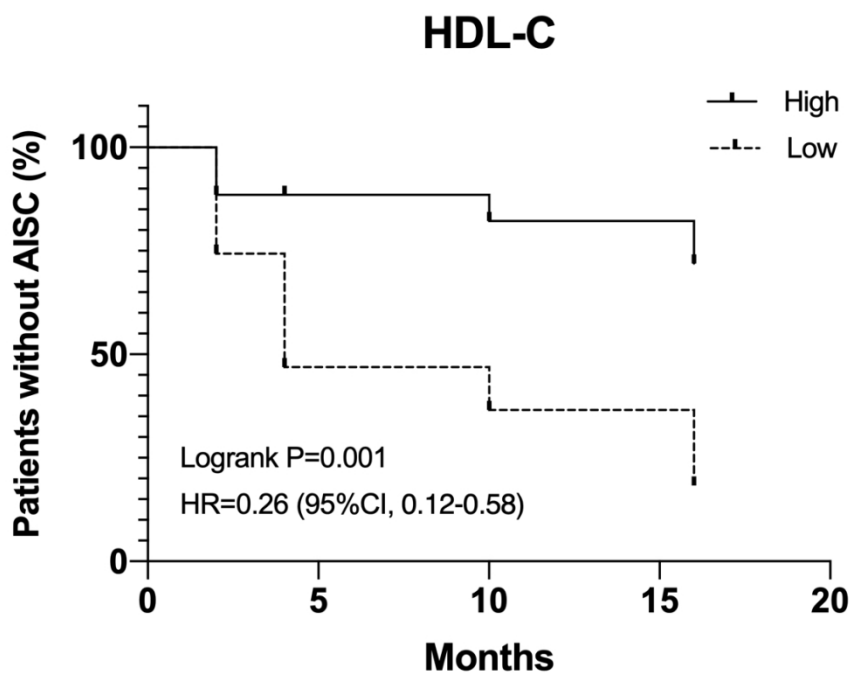

Figure S2. Kaplan-Meier curves of the percentage of patients without AISC in patients stratified by HDL-C level. High HDL-C: HDL-C $\geq$ 1.16mmol/L. Low HDL-C: HDL-C<1.16mmol/L. AISC, anthracycline-induced cardiotoxicity; HDL-C, high-density lipoprotein cholesterol; HR, hazard ratio.

112x92mm (300 x 300 DPI)

Table S1. Baseline clinical characteristics of patients enrolled

|                            | Total cohort<br>n=70  | Low HDL-C*<br>n=42    | High HDL-C*<br>n=28   | P-value          |
|----------------------------|-----------------------|-----------------------|-----------------------|------------------|
| Age (year)                 | 55.03±14.79           | 52.48±16.11           | 58.86±11.83           | 0.077            |
| Male/Female (n)            | 34/36                 | 22/20                 | 12/16                 | 0.435            |
| BMI (kg/m <sup>2</sup> )   | 23.08±3.33            | 23.51±3.29            | 22.43±3.33            | 0.183            |
| ECoG performance status    |                       |                       |                       | 0.465            |
| 0 (%)                      | 37 (52.86)            | 22 (52.38)            | 15 (53.57)            |                  |
| 1 (%)                      | 24 (34.29%)           | 13 (30.95)            | 11 (39.28)            |                  |
| 2 (%)                      | 9 (12.85)             | 7 (16.67)             | 2 (7.14)              |                  |
| Hypertension (%)           | 9 (12.86)             | 5 (11.90)             | 4 (14.28)             | 1.000            |
| Antihypertensive treatment | 9 (12.86)             | 5 (11.90)             | 4 (14.28)             | 1.000            |
| ACEI/ARB                   | 5                     | 2                     | 3                     |                  |
| Beta-blockers              | 4                     | 3                     | 1                     |                  |
| Diabetes mellitus (%)      | 5 (7.14)              | 3 (7.14)              | 2 (7.14)              | 1.000            |
| Smoking (%)                | 21 (30.00)            | 10 (23.81)            | 11 (39.28)            | 0.166            |
| Drinking (%)               | 18 (25.71)            | 7 (16.67)             | 11 (39.28)            | <b>0.034</b>     |
| Heart rate                 | 80.67±10.61           | 81.50±11.04           | 79.43±10.02           | 0.428            |
| LVEF (%)                   | 65.5 (63.0, 67.0)     | 65.0 (63.0, 67.0)     | 66.0 (63.2, 67.8)     | 0.522            |
| FS (%)                     | 35.67±2.10            | 35.60±2.14            | 35.79±2.08            | 0.713            |
| GLS (-%)                   | 20.0 (19.0, 22.0)     | 21.0 (19.0, 22.0)     | 20.0 (18.2, 21.0)     | 0.167            |
| LVDd (mm)                  | 46.30±3.50            | 46.93±3.44            | 45.36±3.43            | 0.065            |
| LVMi (g/m <sup>2</sup> )   | 94.72±17.55           | 96.79±18.54           | 91.62±15.76           | 0.230            |
| E (cm/s)                   | 69.12±13.12           | 69.71±12.79           | 68.23±13.80           | 0.647            |
| e' (cm/s)                  | 7.60±2.15             | 7.60±2.07             | 7.59±2.30             | 0.987            |
| E/e'                       | 9.61±2.41             | 9.66±2.30             | 9.53±2.59             | 0.832            |
| NT-proBNP (ng/L)           | 62.50 (31.25, 132.25) | 51.00 (29.00, 128.75) | 79.00 (41.75, 168.50) | 0.171            |
| cTnT (ng/mL)               | 0.004 (0.000, 0.006)  | 0.004 (0.002, 0.007)  | 0.004 (0.000, 0.005)  | 0.509            |
| HsCRP                      | 2.61 (1.00, 15.64)    | 4.04 (1.17, 20.00)    | 1.95 (0.76, 14.51)    | 0.161            |
| TC (mmol/L)                | 4.09±0.93             | 3.86±0.97             | 4.44±0.76             | <b>0.011</b>     |
| TG (mmol/L)                | 1.40 (0.97, 1.68)     | 1.51 (1.19, 1.93)     | 1.10 (0.82, 1.50)     | <b>0.002</b>     |
| LDL (mmol/L)               | 2.55±0.77             | 2.42±0.80             | 2.75±0.69             | 0.084            |
| HDL-C (mmol/L)             | 1.08±0.38             | 0.84±0.21             | 1.44±0.28             | <b>&lt;0.001</b> |

Values are expressed as mean±standard deviation, n (%), or median (Q1-Q3). Bold values indicate statistical significance.

\* Low HDL-C: HDL-C<1.16mmol/L; High HDL-C: HDL-C≥1.16mmol/L. BMI: body mass index; cTnT: cardiac troponin T; ECoG: Eastern Cooperative Oncology Group; FS: fractional shortening; GLS: global longitudinal peak systolic strain; HDL-C: high-density lipoprotein cholesterol; HsCRP: high sensitivity C-reactive protein; LVEF: left ventricular ejection fraction; LVDd: left ventricular diastolic dimension; LVMi: left ventricular mass index; LDL-C: low-density lipoprotein cholesterol; NT-proBNP: N terminal-pro brain natriuretic peptide; TC: total cholesterol; TG: total triglyceride.

Table S2. Univariable Cox regression analysis of enrolled patients.

| Variables                    | Univariate analysis |             | P values         |
|------------------------------|---------------------|-------------|------------------|
|                              | HR                  | 95%CI       |                  |
| Age, per 1 year              | 0.97                | 0.943-0.998 | <b>0.034</b>     |
| Female vs Male               | 1.41                | 0.63-3.19   | 0.404            |
| BMI, per 1 kg/m <sup>2</sup> | 1.09                | 0.97-1.22   | 0.139            |
| ECoG, 0 or 1 vs status 2     | 0.63                | 0.30-1.32   | 0.220            |
| Hypertension, yes vs no      | 0.22                | 0.03-1.62   | 0.136            |
| Diabetes mellitus, yes vs no | 0.35                | 0.05-2.61   | 0.307            |
| Smoking, yes vs no           | 0.77                | 0.31-1.96   | 0.589            |
| Drinking, yes vs no          | 0.84                | 0.31-2.26   | 0.728            |
| Heart rate, per 1 bp         | 0.99                | 0.96-1.03   | 0.645            |
| LVEF, per 1%                 | 1.09                | 0.94-1.25   | 0.250            |
| FS, per 1%                   | 1.13                | 0.93-1.37   | 0.219            |
| GLS, per -1%                 | 1.46                | 1.20-1.77   | <b>&lt;0.001</b> |
| LVDd, per 1 mm               | 1.05                | 0.93-1.19   | 0.425            |
| LVMi, per 1 g/m <sup>2</sup> | 1.00                | 0.97-1.02   | 0.762            |
| E, per 1 cm/s                | 1.03                | 1.00-1.06   | 0.075            |
| e', per 1 cm/s               | 1.14                | 0.94-1.40   | 0.189            |
| E/e', per 1                  | 0.97                | 0.81-1.16   | 0.752            |
| NT-proBNP, per 1 ng/L        | 1.00                | 0.99-1.00   | 0.153            |
| cTnT, per lg1 ng/mL          | 1.19                | 0.83-1.72   | 0.340            |
| HsCRP, per 1                 | 1.02                | 0.97-1.07   | 0.453            |
| TC, per 1 mmol/L             | 0.78                | 0.51-1.20   | 0.259            |
| TG, per 1 mmol/L             | 0.93                | 0.55-1.58   | 0.796            |
| LDL-C, per 1 mmol/L          | 0.94                | 0.56-1.55   | 0.795            |
| HDL-C group (high vs low)    | 0.24                | 0.09-0.67   | <b>0.006</b>     |

High HDL-C group: HDL-C $\geq$ 1.16mmol/L. Low HDL-C group: HDL-C<1.16mmol/L. BMI: body mass index; cTnT: cardiac troponin T; ECoG: Eastern Cooperative Oncology Group; FS: fractional shortening; GLS: global longitudinal peak systolic strain; HDL-C: high-density lipoprotein cholesterol; HsCRP: high sensitivity C-reactive protein; LVEF: left ventricular ejection fraction; LVDd: left ventricular diastolic dimension; LVMi: left ventricular mass index; LDL-C: low-density lipoprotein cholesterol; NT-proBNP: N terminal-pro brain natriuretic peptide; TC: total cholesterol; TG: total triglyceride.

Table S3. Baseline clinical characteristics of un-censored patients with or without AISC.

|                            | Total cohort          | NO-AISC               | AISC                  | P-value          |
|----------------------------|-----------------------|-----------------------|-----------------------|------------------|
|                            | n=34                  | n=10                  | n=24                  |                  |
| Age (year)                 | 52.85±12.37           | 59.7±9.67             | 50.0±12.45            | <b>0.035</b>     |
| Male/Female (n)            | 19/15                 | 5/5                   | 14/10                 | 0.947            |
| BMI (kg/m <sup>2</sup> )   | 24.01±3.21            | 23.67±3.83            | 24.15±3.00            | 0.698            |
| ECoG performance status    |                       |                       |                       | 1.000            |
| 0 (%)                      | 23 (67.65)            | 7 (70.00)             | 16 (66.67)            |                  |
| 1 (%)                      | 7 (20.59)             | 2 (20.00)             | 5 (20.83)             |                  |
| 2 (%)                      | 4 (11.76)             | 1 (10.00)             | 3 (12.50)             |                  |
| Hypertension (%)           | 4 (11.76)             | 3 (30.00)             | 1 (4.17)              | 0.122            |
| Antihypertensive treatment | 4 (11.76)             | 3 (30.00)             | 1 (4.17)              | 0.122            |
| ACEI/ARB                   | 3                     | 2                     | 1                     |                  |
| Beta-blockers              | 1                     | 1                     | 0                     |                  |
| Diabetes mellitus (%)      | 3 (8.82)              | 2 (20.00)             | 1 (4.17)              | 0.412            |
| Smoking (%)                | 11 (32.35)            | 5 (50.00)             | 6 (25.00)             | 0.309            |
| Drinking (%)               | 7 (20.59)             | 2 (20.00)             | 5 (20.83)             | 1.000            |
| Heart rate                 | 81.03±11.08           | 84.60±13.53           | 79.54±9.83            | 0.231            |
| LVEF (%)                   | 65.0 (63.0, 67.0)     | 64.0 (62.0, 67.3)     | 66.0 (64.0, 67.0)     | 0.270            |
| FS (%)                     | 35.74±2.12            | 35.10±2.28            | 36.0±2.04             | 0.266            |
| GLS (-%)                   | 21.0 (19.0, 22.0)     | 18.0 (17.0, 20.0)     | 22.0 (21.0, 22.8)     | <b>&lt;0.001</b> |
| LVDd (mm)                  | 46.62±3.08            | 45.61±3.41            | 47.04±2.90            | 0.218            |
| LVMi (g/m <sup>2</sup> )   | 94.04±16.26           | 93.27±18.87           | 94.36±15.78           | 0.862            |
| E (cm/s)                   | 70.87±12.84           | 66.43±11.78           | 72.73±13.04           | 0.197            |
| e' (cm/s)                  | 7.59±1.77             | 6.90±1.88             | 7.88±1.68             | 0.144            |
| E/e'                       | 9.66±2.17             | 9.95±1.79             | 9.54±2.34             | 0.626            |
| NT-proBNP (ng/L)           | 46.00 (28.50, 109.00) | 78.50 (31.50, 133.25) | 41.00 (28.00, 122.00) | 0.308            |
| cTnT (ng/mL)               | 0.004 (0.000, 0.007)  | 0.004 (0.000, 0.008)  | 0.004 (0.000, 0.007)  | 0.816            |
| HsCRP                      | 2.28 (0.95, 17.18)    | 1.62 (0.54, 13.79)    | 3.84 (1.21, 20.00)    | 0.216            |
| TC (mmol/L)                | 4.07±0.95             | 4.38±1.31             | 3.95±0.75             | 0.219            |
| TG (mmol/L)                | 1.40 (1.12, 1.63)     | 1.54 (1.67, 1.85)     | 1.38 (1.10, 1.56)     | 0.344            |
| LDL-C (mmol/L)             | 2.59±0.83             | 2.73±1.15             | 2.53±0.68             | 0.530            |
| HDL-C (mmol/L)             | 1.06±0.38             | 1.21±0.56             | 1.00±0.26             | 0.128            |
| HDL-C group*               |                       |                       |                       | <b>0.019</b>     |
| High (%)                   | 12 (35.29)            | 7 (70.00)             | 5 (20.83)             |                  |
| Low (%)                    | 22 (64.71)            | 3 (30.00)             | 19 (79.17)            |                  |

\*High HDL-C: HDL-C $\geq$ 1.16mmol/L. Low HDL-C: HDL-C $<$ 1.16mmol/L.

AISC: anthracycline-induced subclinical cardiotoxicity; AST: aspartate transaminase; ALT: alanine aminotransferase; BMI: body mass index; cTnT: cardiac troponin T; ECoG: Eastern Cooperative Oncology Group; FS: fractional shortening; GLS: global longitudinal peak systolic strain; HDL-C: high-density lipoprotein cholesterol; HsCRP: high sensitivity C-reactive protein; LVEF: left ventricular ejection fraction; LVDd: left ventricular diastolic dimension; LVMi: left ventricular mass index; LDL-C: low-density lipoprotein cholesterol; NT-proBNP: N terminal-pro brain natriuretic peptide; TC: total

1  
2  
3 cholesterol; TG: total triglyceride.  
4  
5  
6  
7  
8  
9  
10  
11  
12  
13  
14  
15  
16  
17  
18  
19  
20  
21  
22  
23  
24  
25  
26  
27  
28  
29  
30  
31  
32  
33  
34  
35  
36  
37  
38  
39  
40  
41  
42  
43  
44  
45  
46  
47  
48  
49  
50  
51  
52  
53  
54  
55  
56  
57  
58  
59  
60

For peer review only

STROBE Statement—Checklist of items that should be included in reports of *cohort studies*

|                              | Item No | Recommendation                                                                                                                                                                                                                                                                                                         | Page No |
|------------------------------|---------|------------------------------------------------------------------------------------------------------------------------------------------------------------------------------------------------------------------------------------------------------------------------------------------------------------------------|---------|
| <b>Title and abstract</b>    | 1       | (a) Indicate the study's design with a commonly used term in the title or the abstract<br>(b) Provide in the abstract an informative and balanced summary of what was done and what was found                                                                                                                          | 1       |
| <b>Introduction</b>          |         |                                                                                                                                                                                                                                                                                                                        |         |
| Background/rationale         | 2       | Explain the scientific background and rationale for the investigation being reported                                                                                                                                                                                                                                   | 2       |
| Objectives                   | 3       | State specific objectives, including any prespecified hypotheses                                                                                                                                                                                                                                                       | 3       |
| <b>Methods</b>               |         |                                                                                                                                                                                                                                                                                                                        |         |
| Study design                 | 4       | Present key elements of study design early in the paper                                                                                                                                                                                                                                                                | 3       |
| Setting                      | 5       | Describe the setting, locations, and relevant dates, including periods of recruitment, exposure, follow-up, and data collection                                                                                                                                                                                        | 4       |
| Participants                 | 6       | (a) Give the eligibility criteria, and the sources and methods of selection of participants. Describe methods of follow-up<br>(b) For matched studies, give matching criteria and number of exposed and unexposed                                                                                                      | 3-4     |
| Variables                    | 7       | Clearly define all outcomes, exposures, predictors, potential confounders, and effect modifiers. Give diagnostic criteria, if applicable                                                                                                                                                                               | 4       |
| Data sources/<br>measurement | 8*      | For each variable of interest, give sources of data and details of methods of assessment (measurement). Describe comparability of assessment methods if there is more than one group                                                                                                                                   | 4       |
| Bias                         | 9       | Describe any efforts to address potential sources of bias                                                                                                                                                                                                                                                              | NA      |
| Study size                   | 10      | Explain how the study size was arrived at                                                                                                                                                                                                                                                                              | 3       |
| Quantitative variables       | 11      | Explain how quantitative variables were handled in the analyses. If applicable, describe which groupings were chosen and why                                                                                                                                                                                           | 5       |
| Statistical methods          | 12      | (a) Describe all statistical methods, including those used to control for confounding<br>(b) Describe any methods used to examine subgroups and interactions<br>(c) Explain how missing data were addressed<br>(d) If applicable, explain how loss to follow-up was addressed<br>(e) Describe any sensitivity analyses | 5       |
| <b>Results</b>               |         |                                                                                                                                                                                                                                                                                                                        |         |
| Participants                 | 13*     | (a) Report numbers of individuals at each stage of study—eg numbers potentially eligible, examined for eligibility, confirmed eligible, included in the study, completing follow-up, and analysed<br>(b) Give reasons for non-participation at each stage<br>(c) Consider use of a flow diagram                        | 6       |
| Descriptive data             | 14*     | (a) Give characteristics of study participants (eg demographic, clinical, social) and information on exposures and potential confounders<br>(b) Indicate number of participants with missing data for each variable of interest<br>(c) Summarise follow-up time (eg, average and total amount)                         | 5-6     |
| Outcome data                 | 15*     | Report numbers of outcome events or summary measures over time                                                                                                                                                                                                                                                         | 5-6     |



|    |                          |    |                                                                                                                                                                                                              |       |
|----|--------------------------|----|--------------------------------------------------------------------------------------------------------------------------------------------------------------------------------------------------------------|-------|
| 1  | Main results             | 16 | (a) Give unadjusted estimates and, if applicable, confounder-adjusted estimates and their precision (eg, 95% confidence interval). Make clear which confounders were adjusted for and why they were included | 6-7   |
| 2  |                          |    | (b) Report category boundaries when continuous variables were categorized                                                                                                                                    |       |
| 3  |                          |    | (c) If relevant, consider translating estimates of relative risk into absolute risk for a meaningful time period                                                                                             |       |
| 4  |                          |    |                                                                                                                                                                                                              |       |
| 5  |                          |    |                                                                                                                                                                                                              |       |
| 6  |                          |    |                                                                                                                                                                                                              |       |
| 7  |                          |    |                                                                                                                                                                                                              |       |
| 8  |                          |    |                                                                                                                                                                                                              |       |
| 9  | Other analyses           | 17 | Report other analyses done—eg analyses of subgroups and interactions, and sensitivity analyses                                                                                                               | 6-7   |
| 10 |                          |    |                                                                                                                                                                                                              |       |
| 11 | <b>Discussion</b>        |    |                                                                                                                                                                                                              |       |
| 12 |                          |    |                                                                                                                                                                                                              |       |
| 13 | Key results              | 18 | Summarise key results with reference to study objectives                                                                                                                                                     | 7-8   |
| 14 | Limitations              | 19 | Discuss limitations of the study, taking into account sources of potential bias or imprecision. Discuss both direction and magnitude of any potential bias                                                   | 11    |
| 15 |                          |    |                                                                                                                                                                                                              |       |
| 16 | Interpretation           | 20 | Give a cautious overall interpretation of results considering objectives, limitations, multiplicity of analyses, results from similar studies, and other relevant evidence                                   | 8-11  |
| 17 |                          |    |                                                                                                                                                                                                              |       |
| 18 |                          |    |                                                                                                                                                                                                              |       |
| 19 | Generalisability         | 21 | Discuss the generalisability (external validity) of the study results                                                                                                                                        | 10    |
| 20 |                          |    |                                                                                                                                                                                                              |       |
| 21 | <b>Other information</b> |    |                                                                                                                                                                                                              |       |
| 22 | Funding                  | 22 | Give the source of funding and the role of the funders for the present study and, if applicable, for the original study on which the present article is based                                                | 11-12 |
| 23 |                          |    |                                                                                                                                                                                                              |       |
| 24 |                          |    |                                                                                                                                                                                                              |       |

\*Give information separately for exposed and unexposed groups.

**Note:** An Explanation and Elaboration article discusses each checklist item and gives methodological background and published examples of transparent reporting. The STROBE checklist is best used in conjunction with this article (freely available on the Web sites of PLoS Medicine at <http://www.plosmedicine.org/>, Annals of Internal Medicine at <http://www.annals.org/>, and Epidemiology at <http://www.epidem.com/>). Information on the STROBE Initiative is available at <http://www.strobe-statement.org>.
