# Supplementary material for: Role of HDL cholesterol in anthracycline-induced subclinical cardiotoxicity: a prospective observational study in patients with diffuse large B-cell lymphoma treated with R-CHOP
Source: PubMed Central journal article supplement — BMJ Open. 2024 Feb 10;14(2):e074541. doi: 10.1136/bmjopen-2023-074541 (PMC10862278; doi:10.1136/bmjopen-2023-074541), 2024-02-10
Supplement: bmjopen-2023-074541supp002.pdf [file bmjopen-2023-074541supp002.pdf]

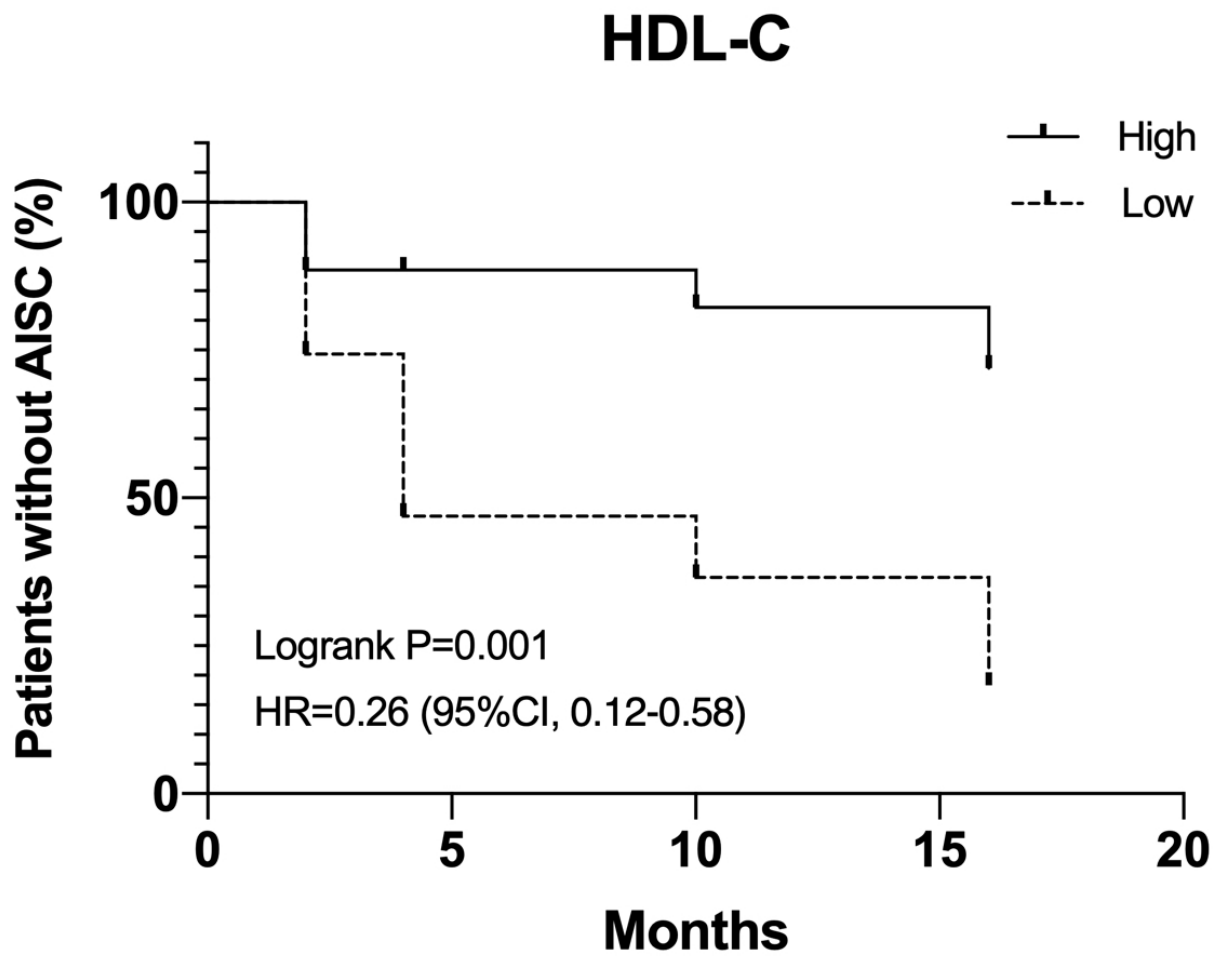

Figure S2. Kaplan-Meier curves of the percentage of patients without AISC in patients stratified by HDL-C level. High HDL-C: HDL-C $\geq$ 1.16mmol/L. Low HDL-C: HDL-C $<$ 1.16mmol/L. AISC, anthracycline-induced cardiotoxicity; HDL-C, high-density lipoprotein cholesterol; HR, hazard ratio.
