# Supplementary material for: Role of HDL cholesterol in anthracycline-induced subclinical cardiotoxicity: a prospective observational study in patients with diffuse large B-cell lymphoma treated with R-CHOP
Source: PubMed Central journal article supplement — BMJ Open. 2024 Feb 10;14(2):e074541. doi: 10.1136/bmjopen-2023-074541 (PMC10862278; doi:10.1136/bmjopen-2023-074541), 2024-02-10
Supplement: bmjopen-2023-074541supp003.pdf [file bmjopen-2023-074541supp003.pdf]

Table S1. Baseline clinical characteristics of patients enrolled

|                            | Total cohort<br>n=70  | Low HDL-C*<br>n=42    | High HDL-C*<br>n=28   | P-value          |
|----------------------------|-----------------------|-----------------------|-----------------------|------------------|
| Age (year)                 | 55.03±14.79           | 52.48±16.11           | 58.86±11.83           | 0.077            |
| Male/Female (n)            | 34/36                 | 22/20                 | 12/16                 | 0.435            |
| BMI (kg/m <sup>2</sup> )   | 23.08±3.33            | 23.51±3.29            | 22.43±3.33            | 0.183            |
| ECoG performance status    |                       |                       |                       | 0.465            |
| 0 (%)                      | 37 (52.86)            | 22 (52.38)            | 15 (53.57)            |                  |
| 1 (%)                      | 24 (34.29%)           | 13 (30.95)            | 11 (39.28)            |                  |
| 2 (%)                      | 9 (12.85)             | 7 (16.67)             | 2 (7.14)              |                  |
| Hypertension (%)           | 9 (12.86)             | 5 (11.90)             | 4 (14.28)             | 1.000            |
| Antihypertensive treatment | 9 (12.86)             | 5 (11.90)             | 4 (14.28)             | 1.000            |
| ACEI/ARB                   | 5                     | 2                     | 3                     |                  |
| Beta-blockers              | 4                     | 3                     | 1                     |                  |
| Diabetes mellitus (%)      | 5 (7.14)              | 3 (7.14)              | 2 (7.14)              | 1.000            |
| Smoking (%)                | 21 (30.00)            | 10 (23.81)            | 11 (39.28)            | 0.166            |
| Drinking (%)               | 18 (25.71)            | 7 (16.67)             | 11 (39.28)            | <b>0.034</b>     |
| Heart rate                 | 80.67±10.61           | 81.50±11.04           | 79.43±10.02           | 0.428            |
| LVEF (%)                   | 65.5 (63.0, 67.0)     | 65.0 (63.0, 67.0)     | 66.0 (63.2, 67.8)     | 0.522            |
| FS (%)                     | 35.67±2.10            | 35.60±2.14            | 35.79±2.08            | 0.713            |
| GLS (-%)                   | 20.0 (19.0, 22.0)     | 21.0 (19.0, 22.0)     | 20.0 (18.2, 21.0)     | 0.167            |
| LVDd (mm)                  | 46.30±3.50            | 46.93±3.44            | 45.36±3.43            | 0.065            |
| LVMi (g/m <sup>2</sup> )   | 94.72±17.55           | 96.79±18.54           | 91.62±15.76           | 0.230            |
| E (cm/s)                   | 69.12±13.12           | 69.71±12.79           | 68.23±13.80           | 0.647            |
| e' (cm/s)                  | 7.60±2.15             | 7.60±2.07             | 7.59±2.30             | 0.987            |
| E/e'                       | 9.61±2.41             | 9.66±2.30             | 9.53±2.59             | 0.832            |
| NT-proBNP (ng/L)           | 62.50 (31.25, 132.25) | 51.00 (29.00, 128.75) | 79.00 (41.75, 168.50) | 0.171            |
| cTnT (ng/mL)               | 0.004 (0.000, 0.006)  | 0.004 (0.002, 0.007)  | 0.004 (0.000, 0.005)  | 0.509            |
| HsCRP                      | 2.61 (1.00, 15.64)    | 4.04 (1.17, 20.00)    | 1.95 (0.76, 14.51)    | 0.161            |
| TC (mmol/L)                | 4.09±0.93             | 3.86±0.97             | 4.44±0.76             | <b>0.011</b>     |
| TG (mmol/L)                | 1.40 (0.97, 1.68)     | 1.51 (1.19, 1.93)     | 1.10 (0.82, 1.50)     | <b>0.002</b>     |
| LDL (mmol/L)               | 2.55±0.77             | 2.42±0.80             | 2.75±0.69             | 0.084            |
| HDL-C (mmol/L)             | 1.08±0.38             | 0.84±0.21             | 1.44±0.28             | <b>&lt;0.001</b> |

Values are expressed as mean±standard deviation, n (%), or median (Q1-Q3). Bold values indicate statistical significance.

\* Low HDL-C: HDL-C<1.16mmol/L; High HDL-C: HDL-C≥1.16mmol/L. BMI: body mass index; cTnT: cardiac troponin T; ECoG: Eastern Cooperative Oncology Group; FS: fractional shortening; GLS: global longitudinal peak systolic strain; HDL-C: high-density lipoprotein cholesterol; HsCRP: high sensitivity C-reactive protein; LVEF: left ventricular ejection fraction; LVDd: left ventricular diastolic dimension; LVMi: left ventricular mass index; LDL-C: low-density lipoprotein cholesterol; NT-proBNP: N terminal-pro brain natriuretic peptide; TC: total cholesterol; TG: total triglyceride.
