# Supplementary material for: Role of HDL cholesterol in anthracycline-induced subclinical cardiotoxicity: a prospective observational study in patients with diffuse large B-cell lymphoma treated with R-CHOP
Source: PubMed Central journal article supplement — BMJ Open. 2024 Feb 10;14(2):e074541. doi: 10.1136/bmjopen-2023-074541 (PMC10862278; doi:10.1136/bmjopen-2023-074541), 2024-02-10
Supplement: bmjopen-2023-074541supp004.pdf [file bmjopen-2023-074541supp004.pdf]

Table S2. Univariable Cox regression analysis of enrolled patients.

| Variables                    | Univariate analysis |             | P values         |
|------------------------------|---------------------|-------------|------------------|
|                              | HR                  | 95%CI       |                  |
| Age, per 1 year              | 0.97                | 0.943-0.998 | <b>0.034</b>     |
| Female vs Male               | 1.41                | 0.63-3.19   | 0.404            |
| BMI, per 1 kg/m <sup>2</sup> | 1.09                | 0.97-1.22   | 0.139            |
| ECoG, 0 or 1 vs status 2     | 0.63                | 0.30-1.32   | 0.220            |
| Hypertension, yes vs no      | 0.22                | 0.03-1.62   | 0.136            |
| Diabetes mellitus, yes vs no | 0.35                | 0.05-2.61   | 0.307            |
| Smoking, yes vs no           | 0.77                | 0.31-1.96   | 0.589            |
| Drinking, yes vs no          | 0.84                | 0.31-2.26   | 0.728            |
| Heart rate, per 1 bp         | 0.99                | 0.96-1.03   | 0.645            |
| LVEF, per 1%                 | 1.09                | 0.94-1.25   | 0.250            |
| FS, per 1%                   | 1.13                | 0.93-1.37   | 0.219            |
| GLS, per -1%                 | 1.46                | 1.20-1.77   | <b>&lt;0.001</b> |
| LVDd, per 1 mm               | 1.05                | 0.93-1.19   | 0.425            |
| LVMi, per 1 g/m <sup>2</sup> | 1.00                | 0.97-1.02   | 0.762            |
| E, per 1 cm/s                | 1.03                | 1.00-1.06   | 0.075            |
| e', per 1 cm/s               | 1.14                | 0.94-1.40   | 0.189            |
| E/e', per 1                  | 0.97                | 0.81-1.16   | 0.752            |
| NT-proBNP, per 1 ng/L        | 1.00                | 0.99-1.00   | 0.153            |
| cTnT, per lg1 ng/mL          | 1.19                | 0.83-1.72   | 0.340            |
| HsCRP, per 1                 | 1.02                | 0.97-1.07   | 0.453            |
| TC, per 1 mmol/L             | 0.78                | 0.51-1.20   | 0.259            |
| TG, per 1 mmol/L             | 0.93                | 0.55-1.58   | 0.796            |
| LDL-C, per 1 mmol/L          | 0.94                | 0.56-1.55   | 0.795            |
| HDL-C group (high vs low)    | 0.24                | 0.09-0.67   | <b>0.006</b>     |

High HDL-C group: HDL-C $\geq$ 1.16mmol/L. Low HDL-C group: HDL-C<1.16mmol/L. BMI: body mass index; cTnT: cardiac troponin T; ECoG: Eastern Cooperative Oncology Group; FS: fractional shortening; GLS: global longitudinal peak systolic strain; HDL-C: high-density lipoprotein cholesterol; HsCRP: high sensitivity C-reactive protein; LVEF: left ventricular ejection fraction; LVDd: left ventricular diastolic dimension; LVMi: left ventricular mass index; LDL-C: low-density lipoprotein cholesterol; NT-proBNP: N terminal-pro brain natriuretic peptide; TC: total cholesterol; TG: total triglyceride.
