# Supplementary material for: Role of HDL cholesterol in anthracycline-induced subclinical cardiotoxicity: a prospective observational study in patients with diffuse large B-cell lymphoma treated with R-CHOP
Source: PubMed Central journal article supplement — BMJ Open. 2024 Feb 10;14(2):e074541. doi: 10.1136/bmjopen-2023-074541 (PMC10862278; doi:10.1136/bmjopen-2023-074541), 2024-02-10
Supplement: bmjopen-2023-074541supp005.pdf [file bmjopen-2023-074541supp005.pdf]

Table S3. Baseline clinical characteristics of un-censored patients with or without AISC.

|                            | Total cohort          | NO-AISC               | AISC                  | P-value          |
|----------------------------|-----------------------|-----------------------|-----------------------|------------------|
|                            | n=34                  | n=10                  | n=24                  |                  |
| Age (year)                 | 52.85±12.37           | 59.7±9.67             | 50.0±12.45            | <b>0.035</b>     |
| Male/Female (n)            | 19/15                 | 5/5                   | 14/10                 | 0.947            |
| BMI (kg/m <sup>2</sup> )   | 24.01±3.21            | 23.67±3.83            | 24.15±3.00            | 0.698            |
| ECoG performance status    |                       |                       |                       | 1.000            |
| 0 (%)                      | 23 (67.65)            | 7 (70.00)             | 16 (66.67)            |                  |
| 1 (%)                      | 7 (20.59)             | 2 (20.00)             | 5 (20.83)             |                  |
| 2 (%)                      | 4 (11.76)             | 1 (10.00)             | 3 (12.50)             |                  |
| Hypertension (%)           | 4 (11.76)             | 3 (30.00)             | 1 (4.17)              | 0.122            |
| Antihypertensive treatment | 4 (11.76)             | 3 (30.00)             | 1 (4.17)              | 0.122            |
| ACEI/ARB                   | 3                     | 2                     | 1                     |                  |
| Beta-blockers              | 1                     | 1                     | 0                     |                  |
| Diabetes mellitus (%)      | 3 (8.82)              | 2 (20.00)             | 1 (4.17)              | 0.412            |
| Smoking (%)                | 11 (32.35)            | 5 (50.00)             | 6 (25.00)             | 0.309            |
| Drinking (%)               | 7 (20.59)             | 2 (20.00)             | 5 (20.83)             | 1.000            |
| Heart rate                 | 81.03±11.08           | 84.60±13.53           | 79.54±9.83            | 0.231            |
| LVEF (%)                   | 65.0 (63.0, 67.0)     | 64.0 (62.0, 67.3)     | 66.0 (64.0, 67.0)     | 0.270            |
| FS (%)                     | 35.74±2.12            | 35.10±2.28            | 36.0±2.04             | 0.266            |
| GLS (-%)                   | 21.0 (19.0, 22.0)     | 18.0 (17.0, 20.0)     | 22.0 (21.0, 22.8)     | <b>&lt;0.001</b> |
| LVDd (mm)                  | 46.62±3.08            | 45.61±3.41            | 47.04±2.90            | 0.218            |
| LVMi (g/m <sup>2</sup> )   | 94.04±16.26           | 93.27±18.87           | 94.36±15.78           | 0.862            |
| E (cm/s)                   | 70.87±12.84           | 66.43±11.78           | 72.73±13.04           | 0.197            |
| e'(cm/s)                   | 7.59±1.77             | 6.90±1.88             | 7.88±1.68             | 0.144            |
| E/e'                       | 9.66±2.17             | 9.95±1.79             | 9.54±2.34             | 0.626            |
| NT-proBNP (ng/L)           | 46.00 (28.50, 109.00) | 78.50 (31.50, 133.25) | 41.00 (28.00, 122.00) | 0.308            |
| cTnT (ng/mL)               | 0.004 (0.000, 0.007)  | 0.004 (0.000, 0.008)  | 0.004 (0.000, 0.007)  | 0.816            |
| HsCRP                      | 2.28 (0.95, 17.18)    | 1.62 (0.54, 13.79)    | 3.84 (1.21, 20.00)    | 0.216            |
| TC (mmol/L)                | 4.07±0.95             | 4.38±1.31             | 3.95±0.75             | 0.219            |
| TG (mmol/L)                | 1.40 (1.12, 1.63)     | 1.54 (1.67, 1.85)     | 1.38 (1.10, 1.56)     | 0.344            |
| LDL-C (mmol/L)             | 2.59±0.83             | 2.73±1.15             | 2.53±0.68             | 0.530            |
| HDL-C (mmol/L)             | 1.06±0.38             | 1.21±0.56             | 1.00±0.26             | 0.128            |
| HDL-C group*               |                       |                       |                       | <b>0.019</b>     |
| High (%)                   | 12 (35.29)            | 7 (70.00)             | 5 (20.83)             |                  |
| Low (%)                    | 22 (64.71)            | 3 (30.00)             | 19 (79.17)            |                  |

\*High HDL-C: HDL-C $\geq$ 1.16mmol/L. Low HDL-C: HDL-C $<$ 1.16mmol/L.

AISC: anthracycline-induced subclinical cardiotoxicity; AST: aspartate transaminase; ALT: alanine aminotransferase; BMI: body mass index; cTnT: cardiac troponin T; ECoG: Eastern Cooperative Oncology Group; FS: fractional shortening; GLS: global longitudinal peak systolic strain; HDL-C: high-density lipoprotein cholesterol; HsCRP: high sensitivity C-reactive protein; LVEF: left ventricular ejection fraction; LVDd: left ventricular diastolic dimension; LVMi: left ventricular mass index; LDL-C: low-density lipoprotein cholesterol; NT-proBNP: N terminal-pro brain natriuretic peptide; TC: total

cholesterol; TG: total triglyceride.
