# Supplementary figures and images for: Role of HDL cholesterol in anthracycline-induced subclinical cardiotoxicity: a prospective observational study in patients with diffuse large B-cell lymphoma treated with R-CHOP
Source: PubMed Central journal article supplement — BMJ Open. 2024 Feb 10;14(2):e074541. doi: 10.1136/bmjopen-2023-074541 (PMC10862278; doi:10.1136/bmjopen-2023-074541), 2024-02-10

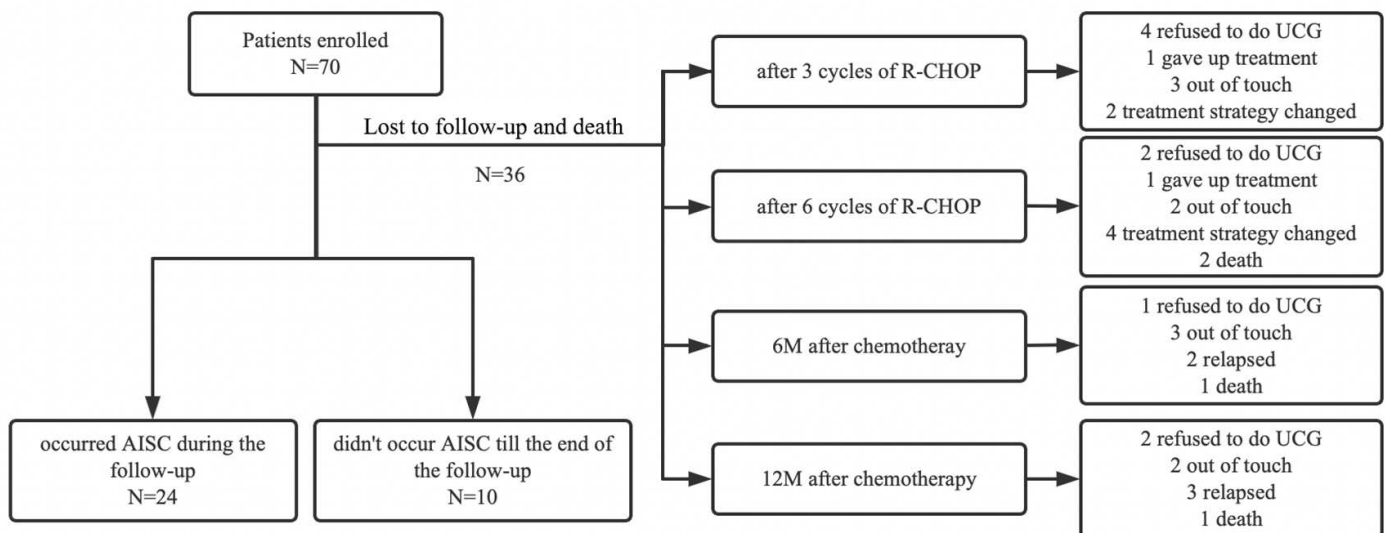

Figure S1. Flow diagram of patients enrolled in the prospective observational study.

Supplement: bmjopen-2023-074541supp001.pdf [file bmjopen-2023-074541supp001.pdf]
